# Supplementary material for: Proteomic and Phosphoproteomic Profiling Reveals the Oncogenic Role of Protein Kinase D Family Kinases in Cholangiocarcinoma
Source: MDPI journal article supplement (doi:10.3390/cells11193088), 2022-09-30
Supplement: s1 [file s1]

The labeling efficiency test in this study showed that the total number of peptides detected in the single shot was 5282 and the number of N-terminal labeled peptides was 5221, with a labeling efficiency text of 98.85%.

Marking efficiency refers to the results of the whole group of samples, each sample is mixed in equal amounts for marking efficiency testing, so there is no marking efficiency data for a single sample; however, the intensity values of the samples can be used to reflect the marking efficiency of individual samples, the intensity values of individual samples for this project all fluctuate within  $\pm 5\%$ , indicating that the marking efficiency of individual samples is basically the same, the specific intensity data are as follows.

| Sample                      | a137Ca  | a138P   | a145Ca  | a146P   | a421Ca  | a422P   | a443Ca  | a444P   |
|-----------------------------|---------|---------|---------|---------|---------|---------|---------|---------|
| Label                       | 127N    | 127C    | 128N    | 128C    | 129N    | 129C    | 130N    | 130C    |
| Raw signal strength         | 1112282 | 1092575 | 1156127 | 1092115 | 1155070 | 1183981 | 1132193 | 1111954 |
| Normalised intensity values | 0.98    | 0.97    | 1.02    | 0.97    | 1.02    | 1.05    | 1.00    | 0.98    |
