# Supplementary material for: Proteomic and Phosphoproteomic Profiling Reveals the Oncogenic Role of Protein Kinase D Family Kinases in Cholangiocarcinoma
Source: Cells. 2022 Sep 30;11(19):3088. doi: 10.3390/cells11193088 (PMC9562908; doi:10.3390/cells11193088)
Supplement: Supplementary file 1 [file cells-11-03088-s001.zip]

Archive with 6 entries (6 files):
- cells-1871545-supplementary/Cells-1871545-supplementary-proofreading.pdf
- cells-1871545-supplementary/Table S1 Characteristics for patients.xlsx
- cells-1871545-supplementary/Table S2 TMT labeling data.pdf
- cells-1871545-supplementary/Table S3 The proteomic and phosphoproteomic profiling of CCAs..xlsx
- cells-1871545-supplementary/Table S4 List of siRNA.xlsx
- cells-1871545-supplementary/Table S5 List of predicted kinase from different methods.xlsx
