# Supplementary material for: Proteomic and Phosphoproteomic Profiling Reveals the Oncogenic Role of Protein Kinase D Family Kinases in Cholangiocarcinoma
Source: Cells. 2022 Sep 30;11(19):3088. doi: 10.3390/cells11193088 (PMC9562908; doi:10.3390/cells11193088)
Supplement: Supplementary file 1 [file cells-11-03088-s001.zip › cells-1871545-supplementary/Table S1 Characteristics for patients.xlsx]

## Sheet: Sheet1
Supplementary Table 1. The detailed clinical features of four CCA patients.
Patient	Gender	Age	Differentiation	T	N	M	TNM Stage	Diagnosis
P1	F	64	Poor	2a	1	0	III	Hilarcholangiocarcinoma
P2	F	61	Poor	2a	0	0	II	Hilarcholangiocarcinoma
P3	F	61	Poor	2a	1	0	III	Hilarcholangiocarcinoma
P4	M	49	Poor	3	0	0	III	Hilarcholangiocarcinoma
