# Supplementary material for: Proteomic and Phosphoproteomic Profiling Reveals the Oncogenic Role of Protein Kinase D Family Kinases in Cholangiocarcinoma
Source: Cells. 2022 Sep 30;11(19):3088. doi: 10.3390/cells11193088 (PMC9562908; doi:10.3390/cells11193088)
Supplement: Supplementary file 1 [file cells-11-03088-s001.zip › cells-1871545-supplementary/Table S3 The proteomic and phosphoproteomic profiling of CCAs..xlsx]

## Sheet: Summary
Supplementary Table 3. The proteomic and phosphoproteomic profiling of CCAs.

## Sheet: Proteome
Protein IDs	P1		P2		P3		P4
	CCA1	NAT1	CCA2	NAT2	CCA3	NAT3	CCA4	NAT4
A0A075B6I9	39101	36174	53876	59147	50573	40672	44653	47331
P04211	39101	36174	53876	59147	50573	40672	44653	47331
A0A075B6J9	7549	7814.6	6034.6	11175	4821	8433.9	8907.9	8977.6
A0A075B6K4	28262	27587	68288	49916	26039	33574	30066	28642
A0A0G2JS06	5286.3	4827.1	2532.9	4980.6	2003.9	3876.2	3434.7	4475.1
A0A087WSX0	5286.3	4827.1	2532.9	4980.6	2003.9	3876.2	3434.7	4475.1
A0A087WSY6	14039	14591	23263	31139	9150	10864	15188	15101
P01624	14039	14591	23263	31139	9150	10864	15188	15101
A0A0C4DH55	14039	14591	23263	31139	9150	10864	15188	15101
A0A0A0MRZ8	4197.8	3660.4	7137.2	6634.8	2303.1	2530.4	2539.9	3429.1
P04433	4197.8	3660.4	7137.2	6634.8	2303.1	2530.4	2539.9	3429.1
A0A0A0MS14	25231	24755	30570	71206	18915	27751	27167	31663
A0A0A0MS15	46277	48564	54994	80238	26987	41833	31741	34721
A0A0A0MT36	24796	21994	22778	29478	17547	22028	37796	44786
A0A0C4DH26	24796	21994	22778	29478	17547	22028	37796	44786
A0A0B4J1U3	6879.8	6276.1	3568.4	4923.1	1840.6	2446	5019.2	5216
A0A0B4J1U7	31102	28579	28134	26541	25804	21501	27495	27460
A0A0B4J1V0	14174	12218	28109	32281	20149	18174	12854	14570
A0A0B4J1X5	1035	972.92	2765.1	3632.5	970.42	1601.8	1173.6	1495.5
A0A0C4DH42	1035	972.92	2765.1	3632.5	970.42	1601.8	1173.6	1495.5
P01767	1035	972.92	2765.1	3632.5	970.42	1601.8	1173.6	1495.5
A0A0B4J1Y8	17864	12913	19591	21108	9259.2	16714	13725	11074
A0A0B4J1Y9	81555	82889	91335	144780	51562	75611	86734	97707
P0DPI2	84465	87892	98731	94996	124940	114480	80013	87873
A0A0B4J2D5	84465	87892	98731	94996	124940	114480	80013	87873
A0A0C4DH24	9593.5	9840.3	11751	18955	8806	13518	8338.2	8010.8
A0A0C4DH25	3603.3	3483.2	3080.5	4996.4	1866.3	2789.4	3241.2	3790.4
A0A0C4DH29	17636	16937	27276	21286	24198	18397	16108	16808
A0A0B4J2H0	17636	16937	27276	21286	24198	18397	16108	16808
A0A0C4DH31	7111	7092.2	9325.9	7188	8449.2	7634.2	7168.1	7271.8
A0A0C4DH32	4318.1	3876.1	3875.4	4259.3	3602.8	3835.9	3783.5	4492.9
A0A0C4DH33	4068.5	4270.4	4190.1	5056.1	3490.5	3774.9	3087.1	4621.6
A0A0C4DH34	64501	54536	80217	79900	44880	44227	42122	44735
A0A0C4DH35	36120	32346	124210	60164	38036	36752	34854	38530
A0A0C4DH36	10938	11241	13940	18765	7894.7	11149	20017	19795
A0A0C4DH38	56087	49462	55505	81940	37625	35876	49546	51585
A0A0C4DH72	23165	20357	16915	21729	12061	13872	6604.5	6285.4
P01599	23165	20357	16915	21729	12061	13872	6604.5	6285.4
A0A0J9YX35	32545	30205	36912	46954	19498	24702	26678	30486
A0A075B6Q5	32545	30205	36912	46954	19498	24702	26678	30486
A0A0J9YXX1	7799.7	7513.8	9218.7	18196	1818.8	2287.8	6684.6	8472.4
A0A0U1RRL7	6845.6	4556.1	7418.9	5102.7	11150	7087	6137.2	6263.9
P0DSE2	2923	2436.4	3159.5	3221.8	4171.8	4124.5	2658.3	2418.2
P0DTU4	2923	2436.4	3159.5	3221.8	4171.8	4124.5	2658.3	2418.2
P01850	2923	2436.4	3159.5	3221.8	4171.8	4124.5	2658.3	2418.2
A0A5B9	2923	2436.4	3159.5	3221.8	4171.8	4124.5	2658.3	2418.2
A0AV96	68537	43222	63395	46022	131190	64069	56030	45185
Q8TBY0	68537	43222	63395	46022	131190	64069	56030	45185
Q9NQ94	68537	43222	63395	46022	131190	64069	56030	45185
A0AVT1	368790	209130	301100	199530	289310	226110	442010	196160
A0FGR8	92238	104740	99669	95522	86556	84831	90947	96710
A0JNW5	2574.9	1720.7	1542.6	1359.3	2002.6	1567	1680.5	1427.8
A0M8Q6	13182	9724.9	9569.8	14095	6710.8	9657.1	9165.8	9762
A0MZ66	176890	132590	144700	127970	133690	116280	123510	128800
A0PJW6	8517.3	5980.9	8316.4	6208.3	13636	6532.8	6802.1	6078
A1A4S6	5110.1	4736.5	5174.4	6035	4153.5	5008.5	5980.4	6052.8
A1IGU5	4488.4	5532.4	5578.8	5647.3	5871.7	5619.3	5593.6	6817
A1L0T0	35157	29744	33048	31629	39005	33643	24505	30734
A1L157	14954	15590	12984	13507	10601	15614	14755	15030
A1L390	5777.8	5589.9	10696	4469.1	12167	4969.3	14074	5103.4
A1L4H1	19924	26772	25521	29933	23507	29450	23341	24537
A1X283	128520	111580	103790	100810	83526	99291	104810	89208
A2A3N6	5436.7	4084.2	3770.6	4408.9	4840.6	3738.3	4374.6	3761.5
A2NJV5	87630	88670	109930	149410	104870	90562	109290	125250
A0A075B6S2	87630	88670	109930	149410	104870	90562	109290	125250
A0A0A0MRZ7	87630	88670	109930	149410	104870	90562	109290	125250
A0A075B6S6	87630	88670	109930	149410	104870	90562	109290	125250
A0A075B6P5	87630	88670	109930	149410	104870	90562	109290	125250
A0A087WW87	87630	88670	109930	149410	104870	90562	109290	125250
P01615	87630	88670	109930	149410	104870	90562	109290	125250
P01614	87630	88670	109930	149410	104870	90562	109290	125250
A2RRP1	133770	128800	148660	120150	154430	129470	145110	112200
A2RTX5	20815	11021	17770	10199	16111	12110	13111	9826.5
A2RU49	534.48	571.85	565.92	355.9	634.99	366.79	493.14	533.8
A2RUS2	31217	22872	28533	25622	33733	24037	24552	21627
A3KMH1	71431	64665	86235	70635	127610	86301	72799	71293
A3QJZ7	6555.9	8448.4	6101.4	6470.1	7328.8	6980.6	7125.1	5402.5
H0Y7S4	6555.9	8448.4	6101.4	6470.1	7328.8	6980.6	7125.1	5402.5
Q5VXH4	6555.9	8448.4	6101.4	6470.1	7328.8	6980.6	7125.1	5402.5
Q5TYX0	6555.9	8448.4	6101.4	6470.1	7328.8	6980.6	7125.1	5402.5
Q5VWM5	6555.9	8448.4	6101.4	6470.1	7328.8	6980.6	7125.1	5402.5
O60813	6555.9	8448.4	6101.4	6470.1	7328.8	6980.6	7125.1	5402.5
O60810	6555.9	8448.4	6101.4	6470.1	7328.8	6980.6	7125.1	5402.5
A6NGN4	6555.9	8448.4	6101.4	6470.1	7328.8	6980.6	7125.1	5402.5
A4D126	10346	13155	11393	10896	10617	12315	10317	14520
A4D1E9	10430	4934.5	11980	4522.3	11529	6759.8	7517.4	4059.6
A4D1P6	53382	53072	56479	50862	63528	56237	43922	49560
A4D1S5	10118	8368.7	9144.3	9015.9	11082	9452.2	9013.4	7728.9
A5PLL7	5015.9	3427	5903.1	4180.4	5059.8	3517	4021.6	3172
A5PLN9	15241	10440	14228	14304	13106	11873	13101	11997
A5YKK6	219660	165840	229410	162230	236060	182780	188230	158140
A6NC98	10794	8207.6	9448.5	8471.2	10574	13666	9366.2	10342
A6NCE7	18226	24971	17035	15675	22199	18751	17312	14444
Q9GZQ8	18226	24971	17035	15675	22199	18751	17312	14444
Q9H492	18226	24971	17035	15675	22199	18751	17312	14444
A6NDG6	73178	48603	51611	43402	56816	46529	53581	44520
A6NDR6	2488.7	3706.3	2817.2	2906.7	3696.3	3702.2	2356.4	4669.3
A8K0S8	2488.7	3706.3	2817.2	2906.7	3696.3	3702.2	2356.4	4669.3
Q99687	2488.7	3706.3	2817.2	2906.7	3696.3	3702.2	2356.4	4669.3
O00470	2488.7	3706.3	2817.2	2906.7	3696.3	3702.2	2356.4	4669.3
O14770	2488.7	3706.3	2817.2	2906.7	3696.3	3702.2	2356.4	4669.3
A6NDU8	13927	14217	16255	13830	12907	13207	14439	14021
A6NEE1	9338.3	8402.5	8620.2	7322.1	12217	10108	21993	11770
A6NFQ2	7071.2	6447.8	9321.6	6124.2	13383	8291.7	8300.7	6269.3
A6NHL2	61915	56688	55921	49106	48554	46066	60214	51686
A6NHQ2	1845.5	735.32	1442.6	592.01	1028.6	830.02	630.02	405.95
A6NHR9	187090	123320	208150	135780	183440	158510	177010	129260
A6NHX0	2472.8	2345	2290.9	2559.7	2213.7	2139.3	2463	2210.5
Q8WTX7	2472.8	2345	2290.9	2559.7	2213.7	2139.3	2463	2210.5
A6NI72	277990	96191	178770	109740	137230	155070	139330	115700
P14598	277990	96191	178770	109740	137230	155070	139330	115700
A8MVU1	277990	96191	178770	109740	137230	155070	139330	115700
A6NJG2	3435.4	2906.6	3242.4	2923.2	3498.5	2727.9	2733.5	2584.6
A6NKG5	45485	18643	21757	18504	82861	20683	31411	20319
A6NKN8	2665.4	2285.6	2815.5	2756.6	2209.9	4285.4	1776.8	5498.3
A6NKT7	33930	19276	32193	16159	25257	18993	20608	16122
Q7Z3J3	33930	19276	32193	16159	25257	18993	20608	16122
A6NNY8	6791.6	5165.4	7920.8	5755.8	5950.1	4621.1	7236	5579.3
Q9UPT9	6791.6	5165.4	7920.8	5755.8	5950.1	4621.1	7236	5579.3
Q96HA1	7032.6	7086.2	7897.9	6503.3	7679.9	7036.7	7203.5	7345.1
A8CG34	7032.6	7086.2	7897.9	6503.3	7679.9	7036.7	7203.5	7345.1
A6NF01	7032.6	7086.2	7897.9	6503.3	7679.9	7036.7	7203.5	7345.1
A8K2U0	54719	36358	271080	42992	52357	44637	56084	35846
A8MTZ0	1319.5	1201.9	791.7	1401.8	1365.6	1200.7	886.41	1128.9
Q9NWY4	36291	21245	32035	24253	24336	22098	27609	23918
A8MVJ9	36291	21245	32035	24253	24336	22098	27609	23918
P62308	10527	6028.1	11580	6237.1	9325.4	7088.2	7979.1	5067.3
A8MWD9	10527	6028.1	11580	6237.1	9325.4	7088.2	7979.1	5067.3
A8MXV4	22208	17787	27142	17077	26570	20713	20137	16574
A9UHW6	17466	18739	17191	19395	18542	23625	22702	19659
B0I1T2	142560	116440	132070	134030	147270	163480	137520	137200
Q99613	256450	172600	252030	154240	227240	179740	208620	152430
B5ME19	256450	172600	252030	154240	227240	179740	208620	152430
B7ZAP0	10294	12680	15102	19993	22069	33582	25983	54040
P0CG08	12152	12315	12311	10857	17665	14358	12092	12854
B7ZAQ6	12152	12315	12311	10857	17665	14358	12092	12854
B7ZBB8	1884.3	1864	2034.7	1919.3	3374.6	1869	1594.7	1264.7
C4AMC7	51526	51635	51916	52202	43380	43444	54986	46244
Q6VEQ5	51526	51635	51916	52202	43380	43444	54986	46244
A8K0Z3	51526	51635	51916	52202	43380	43444	54986	46244
A8MWX3	51526	51635	51916	52202	43380	43444	54986	46244
C9J7I0	2048.6	2534	1757.1	2268.7	2118.5	2402.9	2532.3	2829.2
C9JLW8	21722	20827	19285	17866	19662	23026	17840	20243
Q9H4B7	2103.2	1213.6	1650.1	1295.8	2046.8	1451.6	1628.9	1333.6
O43790	20361	26547	22382	28367	33405	26570	35474	33661
P78385	20361	26547	22382	28367	33405	26570	35474	33661
Q14533	20361	26547	22382	28367	33405	26570	35474	33661
P78386	20361	26547	22382	28367	33405	26570	35474	33661
A6NCN2	20361	26547	22382	28367	33405	26570	35474	33661
O95678	2664.8	3076.8	3564.9	3713.1	8510.4	4000.1	7088.9	3192.8
Q86Y46	2664.8	3076.8	3564.9	3713.1	8510.4	4000.1	7088.9	3192.8
P07477	52990	54590	54450	53252	48203	62746	55363	68593
Q9BYE2	52990	54590	54450	53252	48203	62746	55363	68593
P02533	113980	115010	472810	107220	165440	163040	207750	165430
P02538	153740	131390	671550	124540	282180	183290	234140	143830
P48668	153740	131390	671550	124540	282180	183290	234140	143830
P02768	3606400	4199000	3166600	6132100	1913300	3845900	4947900	6104300
P05787	212740	482960	543180	446520	1274200	655340	757370	448950
P08727	386870	498800	577920	527310	1217400	730160	1092200	547260
Q8N1A0	386870	498800	577920	527310	1217400	730160	1092200	547260
P08779	61883	59221	179520	57707	72222	69431	99096	67569
P13645	208460	198550	338900	168180	234590	234230	265450	266440
Q7Z3Y7	208460	198550	338900	168180	234590	234230	265450	266440
Q7Z3Y8	208460	198550	338900	168180	234590	234230	265450	266440
Q2M2I5	208460	198550	338900	168180	234590	234230	265450	266440
Q7Z3Z0	208460	198550	338900	168180	234590	234230	265450	266440
P13646	20354	16500	75770	20253	24558	92919	20414	19038
P13647	127410	112380	277160	108330	144040	133350	386770	137650
P20930	9359.8	8830.4	13228	8308.6	10398	10657	10107	10642
P35900	94041	295280	116480	533300	120290	134600	132470	113480
Q14525	94041	295280	116480	533300	120290	134600	132470	113480
O76009	94041	295280	116480	533300	120290	134600	132470	113480
Q15323	94041	295280	116480	533300	120290	134600	132470	113480
Q6A162	94041	295280	116480	533300	120290	134600	132470	113480
O76011	94041	295280	116480	533300	120290	134600	132470	113480
P35908	231920	210930	357810	184880	241910	257670	285100	281520
Q04695	128540	118450	759940	116320	291210	193440	570980	116430
O43929	2360.3	1835.1	1988.4	1725.1	2128.5	1708.3	1548.7	1637.8
P08729	24888	33353	50352	59415	96032	45819	96317	32845
Q14CN4	9595.8	7161	15711	25986	7358.1	10527	6452.9	8459.2
Q6KB66	39799	37956	52586	38839	75954	39620	48038	36112
Q8N1N4	4631.2	3818.4	5667.2	4108.2	4889.8	3796.9	4332.7	4598.2
Q86YZ3	40843	28472	33329	20582	26190	31467	30337	31964
Q9C075	28458	25816	26159	27035	55122	28190	24095	26163
Q13765	130180	73481	125680	72121	112410	72562	97259	65891
E9PAV3	130180	73481	125680	72121	112410	72562	97259	65891
L0R6Q1	13643	10927	12598	10440	13625	11907	10709	11010
L0R819	17757	14773	19822	15206	17977	16147	21216	15888
O00115	26303	25182	29511	25401	32384	24306	26427	22854
O00116	176370	114180	168350	106710	144280	118140	145950	97976
O00139	146330	85143	137650	89233	113170	102500	100350	90022
O00142	14063	14566	13882	14954	29936	15829	14512	13407
O00148	23788	14649	18888	14464	23716	18795	18830	13841
O00151	117410	207800	160880	198930	136740	173020	158910	176220
O00154	101180	44760	101290	38683	46430	37056	61012	42765
Q6ZUV0	101180	44760	101290	38683	46430	37056	61012	42765
O00159	254790	457380	277250	341040	294960	455090	247650	430000
O00160	105350	49182	67727	52643	63403	73016	57638	61566
O00161	103780	67970	86303	74223	86717	74476	71828	66737
O00165	9021.2	6840	8968.1	6619.3	13523	8026.1	8324	6630
O00170	141110	85801	129230	87417	131720	111420	96058	89184
O00178	39759	32135	40988	32797	50111	33589	44008	31528
O00182	38803	30755	35135	29388	50088	28616	46031	27667
Q6DKI2	38803	30755	35135	29388	50088	28616	46031	27667
Q3B8N2	38803	30755	35135	29388	50088	28616	46031	27667
O00186	100800	86691	93587	90036	100520	98881	89302	86568
O00187	6182.9	5936.7	4038.7	7198.9	3052.6	5749.7	5124.4	7251
O00193	20902	15672	23342	17542	25299	18148	20140	19338
O00194	8834.1	11761	10015	12736	15908	11990	17927	12700
O00203	179890	161630	175150	136870	173230	134850	155020	119510
Q13367	179890	161630	175150	136870	173230	134850	155020	119510
O00214	8319.1	6623.1	5368.5	5489.4	5518.9	5866.8	5856.8	5132.5
O00217	77996	65152	81056	72193	100620	88038	67341	70101
O00221	7463	4015.7	7467.4	4042	7762.1	5715.2	5849.7	4695.3
O00231	315370	215590	289820	199060	289000	201520	292270	179670
O00232	287790	201920	257910	180550	271580	195770	262610	169840
O00233	63298	56492	56828	49885	64678	53345	51258	51663
O00241	6344.7	3072.6	4838.7	3515.4	3775.9	4281.7	3389.1	3432.6
O00244	47999	48193	43095	42562	48531	43563	54258	42215
O00264	42242	25020	27948	22539	33567	29017	30228	26386
O00267	128420	95312	156950	97972	143170	111880	123410	103740
O00268	13107	13998	15552	14493	17006	14082	14205	14519
O00273	97519	77808	99223	72869	92799	75895	81391	71508
O00291	146920	186460	152750	165220	143230	153070	135060	129370
O00299	139470	100920	145300	93486	162420	114070	121930	83634
O00303	67562	43177	65016	39720	64165	45643	58254	39248
O00327	4067.5	3017.2	4222.6	3602.5	3070.7	3426.6	3843.9	3883.1
O00329	63307	42457	49897	46213	54294	47944	46727	41926
O00330	51206	43873	52255	45216	66177	52653	43370	49290
O00339	13264	15732	13534	15876	12797	22391	10270	21771
O00391	182940	118730	100550	105230	89699	90862	105730	98806
O00399	9440.8	8118.8	8106.6	7452.6	8390	7461.9	7765.5	7710.2
O00400	94399	75449	115270	73181	148610	86075	80182	69264
O00401	53950	58107	57067	50354	65138	51329	63721	48081
O00408	10070	10218	7892.3	8823.6	7952.2	12398	7244.1	12678
O00410	315990	242610	300340	215840	301140	250990	285640	205910
O00411	2328.1	1271	1891.7	1616.5	1806.2	1701.4	1555.6	1485.9
O00418	15525	13412	17281	16605	13385	15203	16814	16307
O00422	68445	53261	74546	55515	74553	60187	71495	52501
O00423	64076	88280	53637	66820	54995	88236	44599	98248
O00425	79777	31333	91472	31044	100290	36318	68634	33497
O00429	179910	156920	225880	138850	199980	174380	232470	147070
O00442	27348	23476	35056	22793	37038	26591	28998	20275
O00443	40315	37423	36548	35319	42378	35881	41657	39106
O00461	53314	46440	63100	38814	50394	43530	52162	32700
O00468	202440	237580	318170	204610	220360	217450	404440	206650
O00469	335120	121290	186610	94489	100420	75229	213380	77583
O00471	143060	143490	133610	127750	157310	136580	141870	119420
O00478	64582	67572	67749	68710	86404	70063	75752	64929
P78410	64582	67572	67749	68710	86404	70063	75752	64929
O00483	67248	67331	72618	60689	69630	74260	53116	65471
O00487	113080	79493	108280	76175	106650	82565	103820	76722
O00488	3159.2	2538.7	3455.6	2281.1	2514	2136.3	2509.2	1655.6
O00499	132790	132240	112120	129020	147120	146330	120390	129060
O00505	43528	39073	43759	34840	40282	34816	55671	33695
O00506	13780	16649	14807	13575	16235	12959	15269	12435
O00515	55381	66291	191980	72631	198350	86378	117380	77743
O00519	2268.7	2507.2	3280.6	2171.4	1904.7	2161.5	4020.2	2372.5
O00533	4517.2	5117.2	5378.8	7168.9	4579.2	10389	5991.1	10979
O00534	74763	93573	84529	99464	107890	112970	88428	105160
O00541	84655	41927	76528	42323	63286	39456	56058	35480
O00560	29538	16741	16379	17019	17310	14749	15980	16461
O00562	25559	23243	24250	20616	35205	25498	27624	22288
O00567	162070	140760	198100	147790	186720	147610	166250	138010
O00571	287900	175620	271020	177740	253330	186680	197250	167180
O15523	287900	175620	271020	177740	253330	186680	197250	167180
Q9NQI0	287900	175620	271020	177740	253330	186680	197250	167180
O00584	82379	93442	132230	82569	82060	67515	60930	64384
O00585	1618.5	2276.9	2052	2772.5	2132.5	3701.6	1737.8	2355.7
O00592	20408	17778	16821	15452	15021	17288	46627	16042
O00602	17033	9040.6	11323	7772.1	10505	15055	8408	11648
O00622	66635	33707	38158	31624	26736	34775	36590	22537
O00625	80687	39554	53597	40460	90663	47344	39538	37590
O00629	74894	59020	81220	55232	70531	64968	65638	56487
O00635	44568	47435	44210	45475	40269	38629	45778	41759
O00712	15249	17561	17211	19479	19658	21901	14142	21682
O00743	20985	16529	21992	15123	21488	18350	19282	15986
O00754	29485	22474	25093	21372	26793	23888	22549	22946
O00762	11322	4504.9	15685	4202.2	7679	3721.5	9255.3	4492.8
O00764	87812	78006	100170	80994	96817	88917	97516	75519
O00767	12079	9942.5	17847	9712	18093	17139	9239.5	18215
O14493	3156.3	8726.2	10997	7817.5	14951	12628	9593.1	7641
O95484	3156.3	8726.2	10997	7817.5	14951	12628	9593.1	7641
P56747	3156.3	8726.2	10997	7817.5	14951	12628	9593.1	7641
O14494	24767	41689	26293	37922	24535	51396	20531	46964
O14495	21994	30571	24577	30465	25780	39127	34178	39250
O14497	27617	19032	24837	22064	28480	24670	23326	28067
O14498	53074	124570	58846	77373	62947	56078	77084	61082
O14503	8829.7	6446.9	6718.7	4918.8	6644.8	5660.5	6187.1	4114.7
Q9C0J9	8829.7	6446.9	6718.7	4918.8	6644.8	5660.5	6187.1	4114.7
O14524	23113	13979	16922	14033	14335	19294	14932	16729
O14530	30454	14588	28782	14791	19694	13229	22721	13002
O14545	17046	13830	17126	14102	21517	15470	17377	14210
O14548	45884	36940	55688	40991	60717	59404	38532	40856
O14556	3388	2330.7	3350.1	1543.3	3269.2	2566.6	4312.4	1612.1
O14558	38421	83066	52465	74218	52012	97956	41369	135530
O14561	111980	70712	102380	66339	179840	102240	86679	83321
O14562	58824	51233	57704	53605	48330	43862	50501	42943
O14569	12351	10834	11842	11275	11331	11023	11185	11185
O14579	65901	61472	69607	53211	80704	59585	64384	47449
O14613	2847.7	3630.4	2426.8	2947.1	2523.3	2988.6	2645.3	3119.9
O14617	177210	162950	194140	154230	193520	155040	176130	139440
O14618	33728	35062	31453	29922	40155	36200	30344	32656
O14639	17490	14215	12737	16781	14998	14385	11800	14933
O14646	4877.7	6866.6	8349.8	6179	17863	8922.3	9668.6	6110.4
O14647	57510	34996	58938	41665	58452	46956	45951	41732
O14653	35497	28593	32551	28661	40178	30709	30641	29777
O14656	22615	19432	20194	21650	17004	20757	21991	22015
O14657	19126	14718	18675	12831	18168	14984	15873	11783
O14662	15967	21238	17268	15992	21637	18434	19215	16990
O14672	68923	60154	67642	57462	63165	55759	48534	52387
O14681	3892	5253.3	5624.7	3499.8	6514.7	4511.6	5454.6	3235.3
O14683	10375	9837.8	10385	7832.2	10866	10395	9327.8	8287
O14684	30363	21524	55096	23728	26540	36230	39774	32632
O14686	3404.5	2517.4	4097	3314.2	3553.9	2851.4	3333.2	2758.7
Q99666	9963.4	7453.6	10964	8198.5	8161.1	7839.4	9249.1	7565.6
O14715	9963.4	7453.6	10964	8198.5	8161.1	7839.4	9249.1	7565.6
O14727	55681	43425	54593	42664	54285	46416	44100	41697
O14732	3355.5	2497.2	3614.7	2700	2922.6	2909.6	2129.3	2022.4
O14733	25136	15395	23984	15467	24241	19728	19726	19745
O14734	6321.7	4946.6	9271.1	4769.8	9370.9	4588.3	8362.9	4477.8
O14735	19235	20437	18217	18724	20283	22379	21029	23371
O14737	43687	39642	45905	44036	33929	35212	49061	41856
O14744	157980	106430	136620	96653	174240	105360	133680	87580
O14745	117740	109470	113800	118740	209980	143800	118480	112240
O14773	85778	68413	76353	62349	63017	56142	60148	52164
O14776	156910	94346	155690	85422	138380	102580	109010	86053
O14786	123720	91524	71515	78301	69955	66126	72960	68876
O14787	13936	16672	18492	13475	18029	15461	16191	12463
O14791	65784	60592	74881	95655	81209	84337	102770	95265
O14802	10060	5986.9	10474	6098.7	9437.1	6470.2	7201.2	5766.9
O14807	9759.9	11225	9851.3	10623	11488	11825	9130.4	11864
O14817	27378	29214	23702	28815	23112	33354	19039	26417
O14818	189270	116580	150420	107380	174100	117730	153660	107980
Q8TAA3	189270	116580	150420	107380	174100	117730	153660	107980
O14827	1391.7	4241	2273.6	2610.5	1860.6	1867.8	3360.6	1884.5
O14828	50239	31052	41921	29831	44383	36654	34432	29824
O14841	63251	51264	71037	52958	87121	61952	43358	52126
O14867	4743.6	4264.5	4777.2	4300.4	3538.3	3885	4857.2	4654.2
O14874	38611	27064	30966	24779	46333	33577	27745	26062
O14879	89871	60486	77194	58712	91103	56631	182030	55427
O14880	23772	24981	23392	24553	44845	36298	22295	28149
O14896	18559	16360	124400	17448	31746	18556	23315	17414
O14907	17311	18255	22390	17829	16314	14619	18960	12955
O14908	33313	23913	32724	24691	33244	25094	29243	23142
Q8TF64	33313	23913	32724	24691	33244	25094	29243	23142
O14920	35716	27907	27536	23904	33103	27194	28934	24138
Q5SRD1	6610.8	3659.8	5696.6	4107.2	9329.5	5090.1	5866.1	3309.3
O14925	6610.8	3659.8	5696.6	4107.2	9329.5	5090.1	5866.1	3309.3
O14929	35416	14481	30225	12840	23251	17647	27422	13902
O14933	36301	25038	38145	27340	44305	25954	46288	24295
O14936	127160	153160	171270	135130	167570	135950	162670	109660
O14939	1073.7	1261.9	988.09	1256.1	1111.3	1081.8	999.65	1108.6
O14949	8340	6500.2	8059.9	6009.3	12429	8914.9	7474.5	7360.3
P19105	141890	105550	112290	98091	126700	132600	95088	208760
O14950	141890	105550	112290	98091	126700	132600	95088	208760
O14964	199250	127740	154670	110750	139510	112420	137610	99460
O14966	4364.4	4835.1	4766	4704.4	7028	5615.1	4354	5362.1
O14967	103850	13054	20520	11979	34933	13163	12835	14119
O14972	29209	24446	26010	22552	28853	23817	23496	21760
O14974	252590	261110	231000	245330	233480	306110	224050	333210
O14975	19916	14142	19764	12855	34651	20930	13604	15929
O14976	144870	104240	114150	106440	169540	109980	129010	103940
O14979	118770	85044	131760	94240	124540	96882	134950	89380
O14980	232720	189970	234870	158650	230580	179260	232900	156610
O14981	3998.7	2334.7	3442.3	2398.4	3514	2806.6	2790.7	2027.5
O15013	71414	58137	53193	46422	82330	60849	53035	41107
O15020	27676	26935	46040	29075	35432	30683	44496	29950
Q9Y2H9	2974	3450.2	2792.8	3062.5	2609.4	3141.6	2404.7	3533.3
Q6P0Q8	2974	3450.2	2792.8	3062.5	2609.4	3141.6	2404.7	3533.3
O15021	2974	3450.2	2792.8	3062.5	2609.4	3141.6	2404.7	3533.3
O15027	122350	96345	120830	88146	125760	96597	100190	85029
O15031	167880	207790	193110	187910	213360	194050	173910	165170
O15040	20918	20681	20263	24251	20010	23487	23128	25494
O15042	119530	78865	127270	75873	109580	87428	96843	74714
O15047	840.8	655.33	903.55	822.31	1200.7	836	913.52	380.32
O15054	21049	11536	17071	11140	19173	14545	12051	12059
O15056	16341	13554	12271	12244	12094	10515	17759	10973
O15061	228490	308830	224750	303170	216450	423000	199990	996730
O15066	30224	27613	34153	26279	35058	26741	32807	24786
O14782	30224	27613	34153	26279	35058	26741	32807	24786
O15067	92733	67806	67493	58369	64593	64264	59855	55831
O15075	20653	28286	22683	27686	20883	33011	27929	34438
O15084	9577.8	7460.4	8160.8	7014.6	9111.3	7815.8	7616.5	8577.9
O15085	40243	37409	42246	33318	43044	39201	39351	33031
O15091	17019	13656	19957	12831	26951	15773	15988	11038
O15111	32735	21074	27621	19114	24611	19663	21127	18765
O15116	15837	14984	20067	16227	22031	17440	16311	15070
O15117	38461	29853	34161	35076	45352	38848	33461	31939
O15118	162750	38650	60632	39059	33437	32866	37115	33755
O15121	6431.6	4947.3	4643.4	5152	4835.3	5063.3	5258.1	4785.6
O15123	4747.4	3323.7	3693.7	2804.4	2549.2	2368	3196.3	2370.9
O15126	82850	68555	69192	63793	59965	57382	67959	58473
O15127	7558.4	8474.9	10159	10570	6082	10906	6572.3	10928
O15143	172580	115270	134870	108200	129850	96117	123050	78944
O15144	245330	181500	208980	176780	179060	181530	190790	157000
O15145	82584	59449	65854	51138	65784	55489	60774	44760
O15155	3007.2	2289.1	3366.2	2127.5	3624.8	1982.4	3370.7	1679.5
O15160	21517	10313	21841	11397	17618	11496	14882	10716
O15162	69918	40349	65032	41355	76842	52261	69667	35361
O15173	150500	130650	113510	116400	162030	130410	107010	111240
O15182	15662	9428.4	11606	10067	9870.4	10893	11017	10528
O15195	73762	95077	75927	89623	232090	129830	72349	85593
O15211	22266	20207	23489	24684	22833	24508	20738	21204
Q12967	22266	20207	23489	24684	22833	24508	20738	21204
O15212	109770	67177	96869	61842	92270	69485	91158	62788
O15213	3838.3	2027.3	4355.8	2065.8	4008.7	2344.3	3794.3	2271.4
O15226	49053	25214	45889	25825	44075	28006	38336	25792
O15228	55503	41715	49746	38588	58265	40837	47336	39445
O15229	2047.3	1037.2	1614	1998.6	4144.8	2764.4	1854	2538.2
O15230	174900	301730	282040	244010	245950	321200	250090	337030
O15231	120370	78055	151650	100170	131980	81378	234020	94993
O15234	6904.8	4531.9	6248.1	5379.6	5985.4	5533.8	7526.7	4166.4
O15243	8967.7	7238.1	6628.7	5848.9	5872	5741.6	6101.2	5155.5
O15247	100990	112420	80752	112440	138690	119110	82891	107170
O15254	40739	30687	32312	31010	34726	30763	30599	30111
O15258	53919	45856	48448	40011	57834	42117	50188	38479
O15260	52377	38950	45270	29718	47129	33019	41081	30318
O15264	31057	27435	45757	28480	45566	31600	34064	25477
O15269	54414	43240	53110	40102	50107	41092	55378	37906
O15270	43938	36493	39717	38652	40724	39236	48771	36755
Q9NUV7	43938	36493	39717	38652	40724	39236	48771	36755
O15294	98162	69261	98797	69948	92939	73934	84384	66725
O15305	97226	95100	115400	83412	135720	105450	93205	92692
O15321	26843	25239	34190	24255	43159	30170	34178	24496
O15327	44743	58400	61673	61129	78064	74985	155080	66066
O15344	12120	13223	12202	13741	13778	16503	12910	13595
O15347	74217	28355	109390	30409	55895	31832	52973	29629
O15355	197360	132520	200670	135670	168340	133440	192030	132090
O15357	62952	46489	53287	47781	58477	45952	56184	40088
O15371	160970	110060	150370	101250	149170	103760	129740	92216
O15372	127120	85582	122140	79032	105180	90489	103660	78156
O15382	57179	46831	49431	43784	116030	56706	56118	46224
O15389	38850	12119	35777	18704	18078	27894	23806	23362
Q08ET2	38850	12119	35777	18704	18078	27894	23806	23362
O15397	18407	14537	19677	12854	17814	14140	18856	12460
O15400	133090	126820	133320	109710	116310	97465	102050	92489
O94900	9236.6	4365.8	7340.8	4602.6	7027.5	4716.4	5194.6	5330.5
O15405	9236.6	4365.8	7340.8	4602.6	7027.5	4716.4	5194.6	5330.5
O94842	9236.6	4365.8	7340.8	4602.6	7027.5	4716.4	5194.6	5330.5
O15427	176530	45099	84910	44432	63375	44696	99625	36719
O15438	49016	58558	47750	61924	87727	56645	40365	49741
O15439	46171	46715	60135	47886	45540	41838	40186	37533
O15446	27902	14932	29405	16184	17722	17286	21334	15132
O15455	22276	24485	19362	22643	25850	21857	26831	23067
O15460	180970	96741	171940	81797	80763	54222	230070	56283
O15479	55910	6426.2	17312	5826.8	8384	6498.3	7470.5	5681.8
O15484	69938	119090	90077	119810	99529	99168	73163	109670
O15498	66184	56374	72918	51781	63399	49701	72061	49149
O15511	104640	73367	85671	66873	76732	70969	80728	57252
O15530	42161	31113	37006	30394	42866	36454	41106	32891
Q6A1A2	42161	31113	37006	30394	42866	36454	41106	32891
O15533	34714	21192	46924	25310	62916	26489	47852	22213
O15551	16595	18193	32649	24589	30036	29654	21254	22758
O43143	313920	197710	348560	197510	319570	228960	269370	195080
O43148	112900	75916	93424	69926	124920	90797	94890	68745
O43149	95039	83839	93489	81385	96905	90463	75783	79535
O43150	35368	33775	36226	30633	36864	31709	58045	31220
O43159	9233.1	7564.4	8630.9	8678.2	7474	7956.6	7755.9	8582.5
O43164	2387	1663.3	2047.5	1934.1	1864.6	1535.9	1749.6	2180.7
O43166	17194	13179	17644	13333	19467	13868	17114	12783
Q9P2F8	17194	13179	17644	13333	19467	13868	17114	12783
O43169	59284	58655	68743	57420	65544	70085	62175	64627
O43172	62979	39478	75329	35883	60027	43813	52663	32841
O43175	84969	103710	111800	86370	92896	120540	120020	112890
O43181	27622	24488	27608	24553	34442	30252	22263	24621
O43236	17355	35287	21863	45484	25336	43017	20917	37697
O43237	141420	124740	126650	109070	134240	112520	106380	98989
O43240	8734.2	7398.9	12504	7265.9	12739	10029	10695	8115.5
O43242	196510	147090	185020	131330	196510	145550	201960	122100
Q9NWB1	12897	14977	14742	11064	12683	11189	12982	11929
O43251	12897	14977	14742	11064	12683	11189	12982	11929
A6NFN3	12897	14977	14742	11064	12683	11189	12982	11929
O43252	192380	141860	182710	123020	154490	125140	197600	109850
O43264	102470	85827	106590	81038	111770	79490	94270	71000
O43272	4884.1	4943.2	7905.3	5749.4	18488	7695.4	5744.4	5702.5
O43278	77401	74463	207660	81351	180590	93174	164170	74718
O43290	52835	34031	57722	44469	54354	45369	47083	40974
O43291	9527	9847.2	26334	10273	24308	14292	32117	12773
O43292	54400	47376	64499	45990	53573	52660	57781	48283
O43293	46667	56081	45898	48525	48304	47728	40248	35360
O43294	66041	95601	70445	83182	64883	108390	58455	94895
O43299	16799	15535	18931	13784	17518	13335	16964	13150
O43301	66971	100690	50868	97856	55586	101690	46761	119980
O43310	19759	19568	17538	18915	18518	21334	17767	15783
O43313	10102	7433.6	7239.7	5523.4	6450.8	6940	6950.5	4482.5
O43314	55073	43218	46860	38214	43116	39475	38892	34264
O43318	12450	7671.3	10729	7339.8	8280.7	8483.4	10130	7370.1
O43324	41676	33724	36361	29565	39084	36586	31641	27984
O43325	2730.7	3069.4	3783.4	3327.6	6351.1	6574.4	3388	4427.8
O43353	49516	29668	41099	34508	57619	38317	33186	32293
Q16566	49516	29668	41099	34508	57619	38317	33186	32293
O43390	362710	250740	374620	247980	349990	284270	288820	227450
O43395	38864	27307	37886	27803	38191	27505	33926	23853
O43396	183060	135400	128110	139040	136970	124000	176030	122470
O43399	160020	131310	184590	112330	151440	116030	125280	117030
O43402	28571	18285	24569	17034	26971	20471	18005	17761
O43405	12813	17104	12094	12988	18041	13592	26249	14215
O43414	20900	20700	24657	17505	30161	18056	20673	13138
O43422	7636.3	4673.8	6087.8	4458.4	5837.8	5100	4841.1	6132.7
O43427	53385	53531	55426	52586	66968	57668	54132	47690
O43432	62512	55176	56991	54143	54883	50315	55363	53585
O43447	103200	79379	120960	80748	96610	85357	87897	78469
O43451	145890	25533	49647	28153	31060	41111	29433	31461
Q2M2H8	145890	25533	49647	28153	31060	41111	29433	31461
P14410	145890	25533	49647	28153	31060	41111	29433	31461
O43464	14710	10525	10671	9664	15699	11018	11654	9946.9
O43488	55048	63951	60171	62660	95087	84857	55384	63440
O43491	293810	469850	253140	463030	304830	425150	277720	471720
O43493	49432	55586	49705	46981	63634	52156	52420	42833
O43504	48932	42275	47738	40598	45938	44210	42070	37046
O43516	16200	13217	12825	14222	11961	12211	12040	11769
O43520	49229	57359	52684	63842	69803	52636	44946	47994
O43556	23192	50596	29258	43696	25521	44595	26403	52142
O43566	24649	12538	19760	14782	16840	17567	16662	15451
O43567	55464	38606	52152	34387	48768	40702	36237	31742
O43570	2034	1038.1	1894.1	1150.2	1415.5	1168.5	1356.7	1295.4
O43583	96785	65790	72089	56780	96469	68472	79061	60706
O43586	43169	29800	41557	33928	37829	40295	27496	28753
O43592	232390	127280	151260	109910	144910	109010	119370	98221
O43598	12703	6652.8	12922	6187.8	11566	6130.4	13132	6394.8
O43615	108740	80408	109330	88068	143540	95466	98273	82204
O43617	18226	18462	16563	14601	18533	17204	18043	15317
O43633	39853	28532	36660	31472	44141	31762	42046	29087
O43639	24549	24421	34536	26948	31152	28319	28751	25292
O43657	26434	32390	36339	28680	31781	24014	31626	19773
O43660	112220	79528	113060	77804	104400	89469	86644	76727
O43663	33648	14161	36142	13103	26967	15109	19330	11514
O43665	29873	21060	23554	22820	29541	21920	20062	19930
O43670	32934	21929	31666	23168	31108	26330	24071	22234
O43674	22568	21317	23579	20732	37203	22351	17402	22556
O43676	38626	43101	42486	40702	59663	51222	33199	46413
O43677	19713	19112	21953	18683	30926	22503	18377	19780
O43678	32803	29016	33171	29933	42559	36744	27133	31837
O43681	75074	68955	70679	63532	68910	61076	60028	60982
O43684	102540	60007	99417	58668	82399	70357	72417	60691
O43688	6014.6	5943.4	8846.7	5776.3	9072	5999.6	7535.9	5422.3
O43704	11075	8199.3	11393	8055.8	13475	7942.9	8462	7031.8
O43707	870990	1176300	1131200	889840	978260	1043700	1331600	743690
O43708	39677	37980	38647	36842	51120	48498	44655	38828
O43709	7985.2	4853	12902	5449	10630	6189	6613.2	4494.7
O43715	17394	21825	20881	19711	25707	30977	19451	26770
O43716	3280.4	2609	2949.5	3482.9	3042.5	3336.6	3720	4137.4
O43719	75846	44985	63196	46602	73360	48181	64985	41810
O43731	15214	17281	17077	16691	13590	12849	15287	13024
O43734	2820.7	2113.5	2579.7	2093	2335.5	2344.5	2122.8	2254.5
O43739	18190	20225	18705	18262	23698	19150	20703	16663
Q99418	18190	20225	18705	18262	23698	19150	20703	16663
Q15438	18190	20225	18705	18262	23698	19150	20703	16663
O43747	106500	79086	109790	74331	122680	80337	88196	72424
O43759	13216	16159	11882	15412	17347	16885	11325	14873
O43760	68185	42687	67408	43491	81237	51781	65268	41188
O43765	119720	82920	114520	73193	104420	83954	100270	65524
O43768	20855	17952	18075	16791	18125	31477	15670	41599
O43772	154210	105530	129290	119960	199880	157680	104980	107280
O43776	201320	170530	188420	175810	235380	183070	217770	169650
O43795	214270	249130	247820	165210	178030	142430	175500	140130
O43809	71644	48316	79548	48286	70363	56048	60443	47953
O43813	55598	62337	73096	59526	69996	76644	66514	66198
O43815	67557	66927	68082	72263	80322	72174	75487	75172
O43818	72118	45854	65154	51503	54584	53558	67791	50533
O43819	13128	12008	15727	13245	29427	15070	15061	13631
O43822	4459.8	5203.5	4573.9	4720.3	4333.1	4727.3	4682.1	4963.3
O43823	40876	30353	45890	26379	43632	33616	29757	27131
O43824	5733.5	5308.9	5332	5833.9	7587.9	5870.1	6135.4	5920.1
O43837	116850	100090	136220	103080	188560	121110	102600	103970
O43847	201400	108660	194170	103790	168230	114240	159260	92419
O43852	250490	257450	164130	221140	249580	138840	343350	155120
O43854	45620	64373	48731	66214	34792	57265	39610	36514
O43865	189950	161780	162100	164780	260880	193110	151810	151560
O43866	82688	84582	88770	166690	81125	150550	112880	99320
O43896	3876.9	3801.1	4445	3822.4	4790.3	4051.5	3283.3	3109.5
Q12756	3876.9	3801.1	4445	3822.4	4790.3	4051.5	3283.3	3109.5
O43913	10222	6089.9	12820	5818	8328.8	7107.9	8748.7	5690
O43914	8184.5	5233	6304	6408.8	6107.2	5446.3	5550.7	5123.9
O43920	40442	36965	38973	34912	56090	42484	28775	36298
O43924	8622.7	6785.6	8764.4	6436.1	7364.9	6897.8	7962.9	6099.2
O43933	4733.8	4814.9	6078.6	5155.8	9414.4	5234.7	6470.1	5109.6
O60216	45609	35339	50089	39359	46507	40597	40582	38250
O60218	95595	179720	102340	188890	696550	246460	104260	181860
O60220	75336	38862	49441	36280	81101	39956	55738	29757
O60231	45153	30540	52548	35412	42700	33677	40698	34884
O60232	17355	11087	16595	12094	18466	13526	15427	12262
O60234	170690	91019	108870	93970	111680	122160	89685	99057
O60237	29192	67335	40964	59286	40220	95586	29199	113550
O60238	8288.8	9478.6	8495.3	8865.3	8841.8	9883.8	8433.7	8605.4
Q12983	8288.8	9478.6	8495.3	8865.3	8841.8	9883.8	8433.7	8605.4
O60240	82296	166250	81345	122490	83295	207800	75244	270720
O60244	14523	10876	15744	10264	13690	11989	11318	9465.5
O60256	76930	52640	63553	53283	66737	63622	55853	59850
O60262	25542	22741	24345	24564	26195	29727	22008	26689
O60264	150760	86315	187400	83325	161410	113460	112800	86067
O60268	20215	18658	17193	24384	27393	22549	21300	24823
O60271	255690	194780	184680	162840	190310	153620	195720	150720
O60287	7416.7	8104.1	6826.2	7182.1	6210	7844.1	6065.2	8327.1
O60291	7468.7	6743.7	8776.2	6043.7	8762.8	6198.6	9604	5305.3
Q96PX1	7468.7	6743.7	8776.2	6043.7	8762.8	6198.6	9604	5305.3
O60299	980.24	801.35	1493.8	939.01	2979.6	1449.4	955.08	833.79
O60306	61718	35173	72120	37228	49538	43895	42160	36111
O60307	9434.4	7505.4	9266.9	8432.1	9725.6	9341	8632.4	8216.4
O60313	253360	203160	259140	207870	325280	249790	222360	213030
P37275	7282.7	4402	4990	4669.6	4132.6	5555.4	3725.2	5224.6
O60315	7282.7	4402	4990	4669.6	4132.6	5555.4	3725.2	5224.6
O60318	20069	14974	21298	14474	18418	18630	16576	17099
O60331	1091.4	2597.6	1065	1827	1279.6	2797.9	1748.4	2784.7
O60333	83276	60249	72117	56562	73751	59635	64094	56085
O60341	92744	72252	108210	66485	106260	78723	83079	65657
O60343	15496	15238	13785	15413	17161	16142	15139	14290
O60347	5557.2	20962	8656.4	16495	6171.5	23712	7308	19428
O60361	33491	18954	32378	15006	26080	17114	25368	12863
O60437	290880	347730	305320	332180	602850	427310	562510	328150
O60443	145320	100560	152000	88180	72671	85274	101220	80158
O60449	64349	54375	58424	52522	78048	67538	79174	53902
O60462	46193	33935	31469	27297	26847	29135	30829	29528
O60476	11089	15074	12485	13420	18000	17774	16094	16689
O60486	39154	38467	30606	35874	29612	33408	29766	33096
O60488	189390	104810	136880	105740	287930	111090	175120	94589
O60493	97181	77397	77962	69749	70563	62573	73207	64454
O60496	50656	38379	38130	38799	41628	37663	40169	34058
O60502	103110	66480	76774	61401	65166	63246	67599	58723
O60504	81560	135790	90545	115370	90930	113330	83934	108620
O60506	336740	193780	314500	167650	230020	174520	222350	151150
O60508	37227	27320	38939	29895	31622	30762	31166	29439
O60513	7203.1	11375	17669	10378	16956	10645	11953	7889
O60518	17144	8231.6	8735.4	6487.4	7570.8	6634.6	9895.1	5706.8
O60524	65301	58901	70497	54299	79936	61052	67226	52028
O60547	56801	118440	77446	91149	200320	135360	66617	100630
O60565	31532	51651	49034	58707	32005	49276	32195	43531
O60568	172910	129160	213990	111390	143530	106480	184510	107130
O60573	12040	9182.6	13100	12013	10309	9489.2	12342	10205
O60603	21082	12817	16017	12663	13830	12226	14795	11282
O60610	313570	202580	287860	204620	266150	221540	281090	188550
O60613	40332	24583	33886	21684	37363	29378	33788	20859
O60635	24347	17491	59807	18101	28710	20482	45494	18742
O60645	94506	94752	93778	84702	104510	90902	88422	80714
O60664	347020	227040	224440	202960	206280	181210	244030	180540
O60669	7453.6	12836	7655.7	10246	17673	13852	6199.1	12241
O60671	24717	11096	21431	12420	22946	11461	16737	9974.8
O60675	15456	8159.7	18464	8808.7	11124	8774.8	9150.5	7778.1
O60678	7955.6	4344.6	9879.9	3873.3	6673.6	4271.2	7697.3	4125.8
O60684	109270	78190	94249	66914	96078	98821	76414	162170
O15131	109270	78190	94249	66914	96078	98821	76414	162170
O60701	381670	289720	207030	196270	526890	188060	228620	153080
O60704	4811.5	3288.1	4842.8	4042.7	4965	3605.8	4062.7	3278.7
O60711	24272	16961	21797	19434	27256	20751	20311	17979
O60716	143320	172010	186860	163110	210090	186160	161300	170480
O60725	6414.3	6450.5	7346.2	6340.3	7274	7044.8	8801.9	6505.4
P41567	48982	31565	49283	32257	41200	37395	48418	28747
O60739	48982	31565	49283	32257	41200	37395	48418	28747
O60749	216360	211170	182060	189050	191630	176690	187990	177680
O60760	18142	24525	18171	24345	18036	26214	14275	28697
O60762	14691	18517	20825	15909	18463	20016	13794	15074
O60763	398030	308030	355070	270170	424440	300540	341330	254850
O60783	4958.8	3904.6	4964.5	4109	6748.1	5403.9	4999.8	4460.9
O60784	64959	56776	57466	62055	70249	52430	67554	51347
P62807	552940	154120	408000	185700	267530	303160	164840	303740
P57053	552940	154120	408000	185700	267530	303160	164840	303740
O60814	552940	154120	408000	185700	267530	303160	164840	303740
Q99879	552940	154120	408000	185700	267530	303160	164840	303740
Q99877	552940	154120	408000	185700	267530	303160	164840	303740
Q93079	552940	154120	408000	185700	267530	303160	164840	303740
Q5QNW6	552940	154120	408000	185700	267530	303160	164840	303740
P58876	552940	154120	408000	185700	267530	303160	164840	303740
Q99880	552940	154120	408000	185700	267530	303160	164840	303740
Q96A08	552940	154120	408000	185700	267530	303160	164840	303740
O60825	99074	74850	123570	75214	138890	84711	92615	75018
O60826	128360	111400	114570	103760	116880	108210	110450	102810
O60830	7254.3	8019.2	7228.4	8859	8802	6275.6	7849.2	7917.8
O60831	33275	33872	31416	35223	27556	30046	31379	30830
O60832	91980	70519	96965	68986	93808	80838	91748	69923
O60841	127640	89970	129550	90670	118160	98699	137170	96290
O60861	9094.3	10669	8105.1	10370	10078	8263.4	7639.5	8869.6
O60869	8895.6	5072	10548	4874.3	7865.5	6631.9	7483.4	4969.3
O60870	17146	12301	20424	14798	16403	14505	16252	14015
O60879	122720	108290	108190	101520	98595	109630	93260	112020
O60880	5835	6146.3	6845.5	6742.7	7985.3	5651.8	5819.2	5315.1
O60884	102690	88249	109350	83013	122470	87223	95482	76284
O60885	49386	39589	51827	42405	51230	45591	45478	43172
O60888	37092	35105	38117	32325	38386	36947	33519	33342
O60911	462.62	350.45	3920.2	547.77	631.8	450.15	930.15	510.58
O60921	12123	8856.7	14687	9310.5	14071	10954	11575	9244
O60925	105390	83657	83175	78381	81843	82245	96369	84049
O60927	12336	12346	14094	12213	14375	11346	11690	10785
O60934	93610	74097	102860	71561	95824	72368	77198	67410
O60936	8693.3	6224.6	10712	6524.9	21519	7902.7	7996	6506.9
O60942	9905.4	7319.3	11577	6928.3	10650	7844.2	9209.6	7516.5
O75022	17851	8605.1	10785	9492.1	9504.4	9812.5	10441	8704.5
O75023	4007.2	3072.1	3473.3	3910.9	2869.6	3396.3	2337.3	3414.7
O75027	76105	53012	66025	56765	90522	70337	71993	54277
O75030	28150	20359	22577	17482	25839	22898	18347	23330
P19532	28150	20359	22577	17482	25839	22898	18347	23330
O14948	28150	20359	22577	17482	25839	22898	18347	23330
P19484	28150	20359	22577	17482	25839	22898	18347	23330
O75031	15176	11373	4454.8	10512	4079.5	5309.8	7521.6	5050.4
O75044	86709	60384	72001	55247	63952	51340	72281	48282
P0DMP2	86709	60384	72001	55247	63952	51340	72281	48282
P0DJJ0	86709	60384	72001	55247	63952	51340	72281	48282
Q7Z6B7	86709	60384	72001	55247	63952	51340	72281	48282
O75052	11706	10671	14593	15791	13037	17151	13952	16755
O75054	3350.4	2818.4	6477	2181.6	4263.7	3402	4293.9	3040.8
O75064	6638.9	6249.3	6161.3	5549.2	5926.3	5492.5	5700.1	4753.6
O75083	611970	625740	532690	514260	523780	555560	525820	493210
O75094	5299	15806	8430.5	17007	8348.3	13894	9086.5	15363
O75095	13048	26434	23039	33078	18820	23550	30094	16924
O75110	31229	34725	31748	30538	38235	34606	42004	28495
O75112	19828	26572	19925	24804	20474	32206	19924	45485
O75113	13363	8676.9	15010	8494	11431	10835	13627	8795.7
O75116	376370	383250	374890	324570	312910	348300	387840	315660
O75122	20778	19073	19666	16499	23082	19120	18288	16170
O75127	4936.5	2833.3	4776	2793.2	7115.7	3033.3	3349.8	3287.7
O75129	4677.8	7465	13281	6843.4	13647	7671.3	9194.8	5834.2
O75131	174660	99791	149280	96430	135400	124920	103830	106950
Q8IYJ1	174660	99791	149280	96430	135400	124920	103830	106950
Q96A23	174660	99791	149280	96430	135400	124920	103830	106950
O95741	174660	99791	149280	96430	135400	124920	103830	106950
Q86YQ8	174660	99791	149280	96430	135400	124920	103830	106950
Q9HCH3	174660	99791	149280	96430	135400	124920	103830	106950
Q9UBL6	174660	99791	149280	96430	135400	124920	103830	106950
O75143	206.73	0	0	168.14	287.87	176.4	192.43	0
O75146	117660	91526	122200	99386	257140	113120	105010	92667
O75147	29875	23276	32103	20069	27546	21032	25928	20025
O75150	95492	61782	88031	64291	79977	67724	75672	63564
O75151	3984.8	3520.4	4342.2	3558.3	4522.1	3910.9	3562.9	3715.4
O75152	41775	29677	41351	37148	43271	33442	43889	33005
A0A1B0GTU1	41775	29677	41351	37148	43271	33442	43889	33005
O75153	167660	111170	174860	109930	171620	112050	120720	104210
Q9Y5I4	167660	111170	174860	109930	171620	112050	120720	104210
O75157	19972	13498	17836	14096	15735	16850	18233	15721
O75164	812.37	688.6	880.97	913.53	1138.4	793.81	867.68	906.16
O75165	572540	282270	349370	274820	311560	297100	289010	257320
O75170	8403.5	8808.1	8002.2	9092.3	13877	9107.6	8741.6	7829.2
O75175	61685	52370	69625	50801	72264	59432	64375	48714
O75179	4812.7	3610.1	4798.2	3264.2	4320.9	3104.1	5158.7	3308.1
O75190	30935	25140	35295	21373	33368	28486	35869	22391
Q8WWF6	30935	25140	35295	21373	33368	28486	35869	22391
Q8NHS0	30935	25140	35295	21373	33368	28486	35869	22391
Q7Z6W7	30935	25140	35295	21373	33368	28486	35869	22391
O75191	6469.9	4976.2	6026.8	6262	8122.4	6074.7	7402.9	5981
O75208	16749	15076	18576	17050	26029	22037	14896	18648
O75223	30936	24059	35077	23568	63414	27234	29535	22434
O75251	70427	58133	73757	60022	96289	72324	62551	68958
O75298	11236	10560	10845	9314	10561	10112	9474.2	10673
O75306	106960	98203	107110	92515	143610	101620	96402	101900
O75312	64910	37550	57260	34967	49394	36116	50979	32091
O75323	59827	46948	74485	46873	116070	67076	52402	53265
O75326	28868	9258.9	13842	9218.4	15201	8629.6	23573	7924.7
O75339	20867	63147	83183	30988	27345	23931	64312	26806
O75340	51147	40941	57648	34883	51342	37285	51951	36906
O75347	127410	85885	105270	79872	105440	88675	103300	86671
O75348	62423	32544	39710	29449	46996	30146	36428	25263
O95670	62423	32544	39710	29449	46996	30146	36428	25263
O75351	125290	107360	116750	108570	136220	109060	137430	105110
O75352	15204	11700	11963	12585	13540	12060	12209	13645
O75356	3684.6	3872.4	3597	3515.4	8000.3	4137.8	4416.5	5471.9
O75363	7593.5	10158	8599.3	13534	12515	9810.5	7218.7	11387
O75367	163510	71808	137380	82945	128590	119260	83193	109490
O75368	118850	148020	115120	125110	120250	148100	124730	143700
O75369	1751500	1071300	1526400	860110	1270100	874820	1765800	767240
O75376	4100.8	4426.5	4244.2	4889.8	4204.6	4381.8	4071.1	5006
O75380	26874	23904	27365	24353	34741	27320	22291	26604
O75381	72365	54804	63465	51875	58999	58840	62919	53120
O75382	50118	48278	48884	60659	43885	47712	45335	54931
O75390	226620	152470	205550	145190	359440	212980	167260	177590
O75391	25932	19083	29116	21674	27500	22149	23543	20638
O75396	58769	53840	56300	52871	64754	60759	62623	51009
O75400	223970	133920	257840	131360	207050	144250	202800	124630
O75410	31794	26568	33938	27492	39991	28736	27269	26241
O75414	3618.1	6666	5408.6	5865.4	5703.8	4465.9	4929.8	3102.4
O75427	28533	21445	24906	22975	26826	25164	26728	23801
O75431	41338	34614	38999	33772	57333	40806	35385	33012
O75436	192840	158710	180860	139790	162530	139570	157420	133630
O75439	141400	94644	137170	83332	154430	106050	104080	83212
O75448	7587.6	4780.8	9543.1	4553.3	7528.4	4489.2	6868.5	4152.9
O75475	76321	76414	65186	90709	69942	98540	70951	100400
O75477	65345	43696	51444	37798	48876	46500	50664	39623
O75487	19315	44753	27338	30377	24341	28103	19835	28723
O75489	89602	84610	95440	77716	128990	98946	82813	106030
O75494	25957	19927	25467	19776	26143	23603	22499	20910
Q8WXF0	25957	19927	25467	19776	26143	23603	22499	20910
O75503	20492	33883	32155	29327	30413	35719	24346	23980
O75506	77386	59095	66258	55432	78675	59268	72391	60918
O75509	3476.3	2664.9	10690	3303.9	5757.1	5148.2	5149.5	3224.9
O75521	70185	58231	63190	60166	116390	90338	58782	57070
O75525	4370.9	5269.5	3185.5	3494.8	7011.9	4532.6	3556	3727.7
O75529	19080	13491	21263	14344	20730	16092	16165	13675
O75530	12038	6413.1	11599	7347.8	9367.3	7157.6	9108.6	6672.2
O75531	109930	57872	104030	57719	80375	93270	52942	84240
O75533	318730	230540	366860	227790	336790	265600	294790	227070
O75534	271230	179480	285830	175630	263690	220410	222790	174060
O75558	3160.2	2988.1	3143.4	3145.1	3426.4	3078.4	3100	3579.4
O75563	86652	54881	75949	61930	63591	80522	60115	70282
O75569	65863	66237	68818	60975	81837	63868	92098	56389
O75570	4608.5	2887.8	4415.9	2729.3	3614.6	2599.5	3314.6	2608.4
O75582	9575.3	7450	8018.9	8556	12521	12044	7387.3	11725
O75586	17243	16077	26221	15888	16234	15224	16160	12648
O75592	47697	48900	50765	49245	54589	51778	48708	43498
O75594	27216	12808	15925	14006	12109	15192	10322	13940
O75607	45381	15192	32104	13339	15934	14241	18357	14278
O75608	59980	44236	71214	45037	74117	53397	50335	39357
O75616	3022.4	824.84	2732.3	763.37	2901.3	1358.2	1664.8	1050.1
O75636	10988	11483	10990	18044	9300.3	12008	9790.7	10541
O75643	759550	579160	777080	624410	647850	594180	659270	609390
O75663	96368	79811	101520	74757	110070	79675	108960	67509
O75674	24757	17455	25898	17066	37533	18966	29383	16903
O75676	46947	43165	55703	42748	55849	45685	50788	43519
O75683	5644.8	4705.8	5576.4	5422.1	5741.5	5316.9	7045.7	5502
O75688	41507	23294	34388	27833	39964	27388	31971	28780
O75689	14822	10854	16386	13270	13456	13157	13084	11445
O75691	42127	24656	38463	25076	30981	26577	33584	26734
O75694	171040	123180	177080	117110	151420	131240	132100	109640
O75695	123370	86266	80779	73106	94810	81633	76901	62736
O75718	66654	63443	60649	45436	54558	34741	81870	36425
O75746	116850	118640	136250	110090	172970	144670	125210	137580
O75781	27986	56715	34964	67142	35556	52081	31806	62292
O75787	33539	13366	20873	15726	16573	13539	22199	11230
O75791	11107	13864	16384	16160	21761	21051	12570	18237
O75792	19812	11946	16564	11805	14764	13818	14612	11921
O75795	10547	22397	12671	23331	54718	20511	10342	22286
O75817	16681	12292	16756	12409	16778	11380	14044	11941
O75821	81401	55518	79018	50432	72145	56027	66269	49108
O75822	140560	112780	137010	103540	146290	110450	122550	93538
O75828	44799	49354	40881	52218	43763	70655	52590	52115
O75832	43296	33845	38136	32976	39241	35962	39071	32930
O75841	6605.7	14433	9359	26783	27774	12349	7083.3	7808.7
O75843	37323	30512	32755	28813	44015	32558	35373	29851
O75844	84203	80330	68870	82565	75372	73451	74784	82184
O75864	25589	22394	30947	22449	41728	23456	37511	24247
O75874	517930	462590	484050	435030	1213400	695100	453130	389130
O75880	12415	12842	14128	11215	15919	15986	12143	13267
O75882	98280	96884	95319	133640	76065	109280	116710	119680
O75884	28248	37797	40495	36460	54841	47727	33554	32539
O75886	66073	55523	60802	53902	52880	55443	57739	50295
O75888	13482	13722	9987.1	11485	9666.2	9568.1	12682	8810.4
O75891	139680	45152	81185	37629	48560	66125	40229	48658
O75907	11719	11775	13940	12312	15798	13895	11926	12917
O75909	20690	17003	22487	15384	20063	17728	17617	13420
O75911	21958	23130	26642	23254	46814	28700	19802	26659
O75915	51539	48166	44729	44657	74102	50387	48009	42769
O75923	331300	170120	196880	160520	140210	190150	144890	167110
O75934	42251	28382	42539	28793	37398	30039	33955	27781
O75935	54228	50197	48551	45829	49504	44118	49205	42455
O75937	57439	42429	64481	45413	57369	51363	47673	45731
O75940	23549	15180	26943	15297	23560	19496	17467	16556
O75947	192940	147100	153690	154140	253040	164220	148950	140750
O75953	7664.2	9532.3	7286.6	9031.1	4495.2	13171	5532.9	22590
O75954	1585.8	5224.1	2917.5	4198.7	2548.6	4442.1	2842.5	3423.1
O75955	258510	140800	181680	138390	189540	149250	146870	131340
O75962	23900	20508	17424	15450	15624	15239	19744	13924
O75964	34026	27050	26499	28547	37568	33431	28390	30622
O75976	118290	74763	98035	80475	145810	97099	87502	78845
O75995	23025	15827	13333	22529	19416	20297	20162	21747
O76003	144620	62835	90192	54195	78801	53504	78560	52047
O76021	74044	32812	71793	30694	56589	35456	53959	32032
O76024	45043	42991	40381	41203	41470	49967	63514	51910
O76027	21967	28610	23219	34028	39742	42382	31599	31878
O76031	61932	42371	65440	41838	91982	46637	57982	39793
O76054	13367	15220	16058	12232	16377	12461	15206	11434
O76061	1633.9	3329.6	3255.3	3226.2	1135.5	1840.8	1383.4	1447.2
O76062	22747	27354	27804	25745	43237	44963	37004	38527
O76070	69646	74739	42645	66185	56187	102900	73885	102610
Q16143	69646	74739	42645	66185	56187	102900	73885	102610
O76071	52629	31673	42077	28732	49539	26678	35745	24113
O76074	8211.2	9018.4	7461.9	9003.4	8203.5	8636.2	7927.8	9221.6
O76076	3603	19613	7188.8	13050	6486.9	15903	5934.6	13276
O76094	201730	149060	173570	150360	189790	150460	186670	136120
O94760	54494	125140	91941	118910	237710	184130	68764	119900
O94766	61346	34745	37282	34644	46819	35297	44525	36300
O94768	11812	7964.5	11593	9110.8	12155	12613	12032	9077.4
O94769	1131.8	3946	1532.4	2370.1	1183	1603.1	3464.6	4005.9
O94776	76114	58458	82847	61774	71990	71504	74175	64966
O94788	103930	125990	117270	117880	321830	162700	99451	125090
O94804	181490	114120	138980	126770	127240	143160	141100	121470
O94808	147260	49728	56572	29987	27525	23225	51306	19764
O94811	9507.6	10574	14794	10108	11305	16926	8952.3	20681
O94813	7640.6	10987	9482.7	11954	9710	9629.7	8080	10131
O94817	31279	27279	30917	25128	30108	30807	34760	27530
O94819	3588.9	5420	4264.3	4654.6	5379.8	6271	2687.3	5411.2
O94822	15087	9814.5	13217	10640	11382	11044	13304	10361
O94826	247050	162480	266540	169610	329030	198900	198740	166790
O94829	4905.9	4918.1	5617.5	4394.2	3991.1	4509.7	4739.3	4547.1
O94830	11366	16271	18870	16280	16066	16674	16233	15944
O94832	130480	397460	228010	275540	260260	216000	185160	183660
O94851	55961	38752	46889	37158	37912	37659	52893	35547
O94854	12206	10081	12144	9651.2	17287	15403	10647	15153
O94855	108260	116140	118440	97652	144660	89006	118210	76784
O94868	2944	1896.5	2849.3	3207.2	2317.6	3223.3	2922.7	3631.7
O94874	205340	207750	210110	194690	268360	215980	220520	207310
O94875	97279	185120	123180	183320	125370	276890	88587	229130
O94880	7244.1	8018.6	10662	8340.6	9361.3	9454.9	7845.5	8623.4
O94885	23460	15787	20218	15842	20201	16723	16586	18956
Q9NSI8	23460	15787	20218	15842	20201	16723	16586	18956
O94886	2286	2094.1	1860.9	2021.2	3978.5	2230.3	2337.2	1772.6
O94887	7810.2	6063.1	4709.7	4684.8	5273.9	4593.3	5920.8	4155
O94888	29285	21017	29191	17630	24437	20001	21588	18459
O94901	76297	64080	83097	60928	66598	75658	76707	72240
O94903	62623	67852	83518	65800	82663	79595	63228	63019
O94905	195100	211450	241750	204780	331900	270530	220810	214690
O94906	184730	142030	207450	136480	196700	149260	172110	126890
O94911	22161	44215	25778	47672	25723	67962	23923	64522
Q8IUA7	22161	44215	25778	47672	25723	67962	23923	64522
O94913	11390	9820.7	10538	9190	11232	9524.6	9347.5	9017
O94915	28395	19955	22330	19367	21649	20457	26927	21312
O94919	83470	107720	84505	115430	135890	113560	101860	96111
Q96Q40	1316.8	1852.4	1658.1	1312	1566.9	1455.7	1567.7	1394.7
O94921	1316.8	1852.4	1658.1	1312	1566.9	1455.7	1567.7	1394.7
O94923	5718	3765.6	6001.8	4404.7	5358.7	5306.6	4689.7	3684.5
O94925	172130	101450	136280	105950	111100	108080	127880	96991
O94927	3239.2	2191.8	2890.2	2486.6	2588.8	2319.4	2265.3	1992.4
O94952	1776.8	1930.5	1994.2	1994.4	2253.1	1882.1	1986.9	1703.8
O94956	33747	30310	29650	33420	26154	24588	27965	24863
O94966	57441	39317	51729	39960	56372	42542	44878	41003
O94967	4410.7	3829.9	4271.1	3773.7	3553.7	3507	3704.7	3897.5
O94973	215860	188420	187170	174800	188660	184560	158780	156240
O94979	270090	231760	276180	209820	309880	210970	244420	183570
O94985	46433	27314	42088	28398	25861	26307	47830	23735
Q9H5Y7	1063.3	668.78	1872.8	639.87	772.98	1169.9	1604.2	841.81
O94991	1063.3	668.78	1872.8	639.87	772.98	1169.9	1604.2	841.81
O94992	41514	28440	42498	26690	40548	28384	33195	23541
Q96MH2	41514	28440	42498	26690	40548	28384	33195	23541
O95050	11643	12550	12774	17222	26926	42467	23231	15953
O95070	13541	13717	12723	12441	14068	10646	13409	11729
O95071	17395	12676	18476	12846	16707	12735	13647	12326
O95081	3336.9	3930.8	3639.6	4107.5	7282.9	4900.1	2963.4	3948.7
O95104	23928	19858	23855	21367	22401	23152	25517	23996
O95139	56612	53309	57307	51344	79585	61744	54407	58378
O95140	59468	58308	73614	55825	72964	66753	59790	66890
O95149	19691	16860	28696	18483	22990	20222	18552	16918
O95154	12994	20956	16958	21907	64086	36524	12829	20072
O95155	59700	46025	58456	44659	49605	48752	47552	44639
O95159	6305.7	4789.6	5586.9	5207.6	6217.7	4684.7	6869.6	3725.9
O95163	109040	69950	105010	67107	84355	62972	73726	57402
O95164	3428.6	4095.8	3080.5	3534	4458.1	4308.3	4082.8	3949.2
O95166	22957	16729	22857	17012	21049	18957	16251	15621
O95167	50979	47111	51044	45845	71986	52565	45072	48809
O95168	49948	46224	55860	49483	67400	54610	41796	51411
O95169	20651	21525	22465	19068	30497	24990	17166	25162
O95171	11935	2948.6	10806	2798.4	10034	6193.8	4585.6	2865.7
O95182	26141	21415	25519	23677	33500	30667	18858	26197
O95183	29038	17922	18209	19685	21134	19076	19960	19729
O95197	34258	20950	22219	19328	24847	21783	21399	21906
O95199	4965.2	6667.5	4981.9	6301.3	4993.5	5847.1	5690.5	6111.8
O95202	253740	158890	213260	143590	335160	162710	214350	144130
O95208	14180	12379	12382	12054	11225	11037	11607	10482
O95210	28297	19806	22679	21307	25853	24374	19829	22787
O95218	23741	29735	19480	39789	25242	21500	51365	27493
O95219	51211	54162	47143	46796	53931	43917	46878	40293
O95232	92667	82252	59094	70733	50858	57290	68725	62691
O95239	11849	2995.8	7887	2916.5	5747.9	3727.5	8306.1	3723.7
O95248	44698	44853	48068	44482	49374	47390	43622	43297
O95249	60360	51382	61794	47332	72085	59685	62958	54811
O95251	12029	8822.9	13475	7663.7	13374	11003	10463	10018
O95260	25842	20858	20138	21026	22678	21625	19610	21675
O95273	2288.6	2246.6	1932.6	2473.7	1824.3	2398.4	2319.2	2371.8
Q9Y2K3	2288.6	2246.6	1932.6	2473.7	1824.3	2398.4	2319.2	2371.8
O95274	5278	4603.9	34217	4782.4	7823	4650.6	24128	5036.4
O95292	139680	118930	167250	107900	165670	134490	140940	120100
O95295	16136	15535	15874	15273	17617	15320	13286	14215
O95298	22345	22429	22106	22515	32417	29273	18388	30954
E9PQ53	22345	22429	22106	22515	32417	29273	18388	30954
O95299	97029	108720	116720	99143	163600	121970	93300	112020
O95302	147190	170240	252500	134120	149680	119910	212030	109420
Q75LS8	147190	170240	252500	134120	149680	119910	212030	109420
O95319	8486.3	7213.8	7477.7	9781.7	8779.3	9089.6	6994.6	9343.1
O95336	92692	88859	88828	80848	103640	95071	80780	72101
O95340	81141	73404	56442	53954	54330	53298	59547	47377
O95347	185830	80501	182040	82530	109960	88389	128200	81730
O95352	111650	78771	84675	86328	80216	80897	87809	80282
O95359	5447.4	3008.2	6545.1	4430.1	4669.1	3862.3	2706.1	4090.9
O95361	11990	10987	18283	10250	22611	22562	19083	10448
Q309B1	11990	10987	18283	10250	22611	22562	19083	10448
O95363	5916.7	5791.6	6237.9	5590	7214.2	6750	6169.8	6473.5
O95365	738.59	950.65	755.43	1671.1	1690.3	834.92	742.18	699.32
O95372	20198	16048	19208	15946	26301	18016	23942	15336
O95373	243350	155610	203400	130000	203620	137560	200130	120700
O95376	49401	36100	45168	35570	43218	37765	41042	33439
O95379	44682	30590	36996	38096	40660	39960	33809	36211
O95382	19262	20092	25643	19299	23049	21599	21291	15498
O95391	5906.9	5467.9	6360.3	5012.1	6610	5443.2	5686.4	5462.5
O95394	234900	239380	244360	179070	225320	153850	204000	144690
O95395	10581	12471	10987	12874	24235	14326	12490	13337
O95396	28945	37461	43841	32879	36159	45610	27712	35513
O95399	14412	10576	15438	10886	14657	12509	14649	11231
O95400	25156	17821	23306	18446	20849	20405	21390	21285
O95407	29084	15589	45113	16793	26572	19559	37759	15528
O95415	2654.4	1779.2	2239.5	1760.8	2710.3	2252.9	2126.4	1668.8
O95425	233700	269820	230470	252130	277180	306460	222270	324940
O95428	8148	7981.3	7985.5	7617.8	10309	12833	7791.3	11372
O95429	3465.7	3091.4	4244.3	3028.1	3466	3968.8	4006.3	3111.4
O95433	174000	120450	161620	121650	168970	128420	159130	122250
O95445	21097	19112	17147	25946	13402	24505	21779	22101
O95453	70246	49835	75096	52961	59521	52912	57742	52613
O95456	39333	30468	44476	30153	38174	32128	40475	26255
O95466	337440	151190	208150	168430	197300	196210	201610	165650
O95470	158450	135310	151640	151640	152790	124140	200380	144430
O95476	9649.2	6738	8173.2	7077.7	9684.8	7112.8	7197.4	6543.5
O95477	7741.4	4133.5	4439.1	3482.9	3644.6	3728.2	4157.2	3760.3
O95478	2882.2	2283	3722.5	1375.9	2524.7	1445.6	2155.9	1047.2
O95479	94953	81408	105580	90702	93941	96663	80474	81627
O95486	61458	50229	64837	48606	71165	48252	53908	49157
O95487	58504	44793	50089	47186	55569	46780	51304	45950
O95497	67387	45082	33954	29824	49245	31341	27326	30196
O95498	76134	23148	37101	26029	31388	35285	26830	29289
O95544	22034	8744.2	16603	8554	13996	12280	11184	8812.3
O95563	17603	15551	17283	17158	37494	22173	14507	19836
O95571	83098	69030	107740	72151	139020	91551	98459	69756
O95573	132730	84659	128020	82808	143480	95151	102350	78240
O95602	77018	44200	100310	44727	71435	50612	66878	42531
O95613	14765	16199	13383	18079	14580	15060	14378	15353
O95622	1015.6	1661.5	1215.6	1678.7	1590.3	1887.9	1449.4	2526.6
O43306	1015.6	1661.5	1215.6	1678.7	1590.3	1887.9	1449.4	2526.6
O95625	5571.3	4363.4	5922	4424.1	5183.4	4810.1	3962.6	4025.8
O95628	8362.3	6483.9	8333.6	5784.1	8330.7	6493.4	6565.4	5673.2
O95630	55193	37010	48458	36386	64677	41366	54725	36726
O95631	26069	53720	33828	42599	37223	37707	32567	32968
O00634	26069	53720	33828	42599	37223	37707	32567	32968
O95639	13060	6680.8	14055	7509.2	12335	7496.7	9957.3	6054.3
O95671	58105	70832	51507	50818	47938	47480	54188	51198
O95674	51726	40085	43753	38078	46288	49320	45584	45534
O95684	7271.9	6373.6	8049.5	6272.7	6487.6	6092.8	6703.6	5690
O95685	22239	17219	24311	19028	20056	18303	20047	17423
O95714	2385.7	1422.2	1624.4	1422.5	1566.7	1600.5	1802.1	1602.7
O95716	49808	27853	45922	29410	30887	42676	22943	33733
O95721	18916	13482	15993	15774	20110	17056	15515	15403
O95747	163840	126380	169560	117630	191080	133940	141860	110270
O95749	25267	23428	23703	21473	32467	24230	27533	21206
O95757	539240	195710	352530	196970	209190	199800	171380	224740
O95758	23378	19193	33265	21043	27419	22542	27320	20580
O95759	17140	18916	18885	17611	20057	19800	17652	16940
O95777	2481.6	1471.5	1864.4	1616.5	2465.2	1976.2	2351.9	1352.8
O95782	308740	330720	346520	297660	325310	271070	330080	251100
O95785	3508.4	2462.1	4100.4	2238	2676.9	3226.6	3921.4	3092.4
O95786	181430	160150	164110	141270	229910	161840	414170	144460
O95793	60309	45831	84596	43500	81455	49249	76851	39218
O95801	41260	17189	33842	15665	27245	18388	23558	15395
O95807	5251.3	3757.4	4907.8	3862	4698.9	4461.4	4297.3	3638.3
O95810	55483	124440	61379	119440	64572	138610	52278	169510
O95816	156330	128350	87767	102160	54225	111860	67923	108910
O95817	170790	108760	111950	101050	87952	108320	83887	105960
O95819	43941	32581	40605	35911	35399	29303	42076	29603
Q9UKE5	43941	32581	40605	35911	35399	29303	42076	29603
O95822	67061	64770	68671	66523	92859	78771	63624	72915
O95825	59821	49223	55161	54490	52284	50762	59191	53729
O95831	156560	164740	165010	147050	262400	209660	147330	150060
O95832	12000	9630.2	22992	10651	14930	11715	10509	9965.6
O95833	4869.7	4617.6	6406.4	5703.9	8579	5053.6	19967	3741.3
O95834	111300	117450	200300	116400	167940	144690	148210	118040
Q6ZMW3	111300	117450	200300	116400	167940	144690	148210	118040
Q05BV3	111300	117450	200300	116400	167940	144690	148210	118040
O95837	5169.3	15057	6667.7	12079	7786.5	13488	5728.5	11547
O95848	8753.8	7834.4	10159	10027	15352	11979	13272	8804.1
O95858	61401	56730	46281	51762	54230	40718	32527	43823
O95861	120400	110110	116470	109050	191850	134150	112700	98841
O95864	12315	12504	28665	12503	16234	15456	15359	10216
O95865	89659	180460	127230	170460	142010	177730	103130	167250
O95870	28028	22616	27159	24688	27529	26770	25744	22927
O95881	103400	67469	105630	56341	95711	70003	81750	53976
O95965	25966	56897	38531	44028	29547	29007	44903	28510
O95967	64770	120450	78718	92277	70214	75831	61787	68837
O95976	7801.6	6591.2	5237.9	7397.2	3814.4	4954.5	6370.6	6925.4
O95980	45895	104160	50253	90732	50624	93054	48411	89602
O95989	55374	55373	62705	50177	70784	60927	47967	59313
O95994	63018	99817	121120	76957	178730	187800	65615	138580
O95999	33478	22460	30529	20889	28947	25559	29325	22048
O96000	59923	55853	66813	57057	91137	63617	51256	59048
O96005	49634	29269	59856	32232	60023	38481	58219	30029
O96006	7573.8	4489.6	8691.9	4784.4	7449	5268.3	6799.4	4781.5
O96007	1480.8	905.93	911.44	1169.1	915.6	1064	1052.6	1358.5
O96008	151610	97382	161550	97756	187090	109140	158740	93835
O96011	38826	33521	40244	32963	50394	37217	44336	33815
O96019	89709	65862	109140	77018	94282	77421	84385	73355
O94805	89709	65862	109140	77018	94282	77421	84385	73355
O96028	15802	6528.5	11432	5737.6	11597	7349.1	10935	5212.5
O96033	18571	18389	15017	15311	15021	17176	11301	16435
P00167	28429	53540	30571	50257	97130	69379	31359	58383
P00325	108830	524220	119290	405260	156060	602620	140750	733240
P00326	3066.7	16869	3700.3	10327	17958	12520	4826.8	6508.6
P00338	440210	316190	316140	233320	272280	258260	323480	228090
Q6ZMR3	440210	316190	316140	233320	272280	258260	323480	228090
P07864	440210	316190	316140	233320	272280	258260	323480	228090
P00352	211890	347780	223890	316770	516640	453000	191500	611850
P00367	274080	222260	255350	219280	281370	265840	211840	228910
P00387	223190	290550	232230	267080	254730	273290	185350	226480
P00390	216080	163360	163600	179390	369680	249590	160060	171750
P00403	63694	54747	75382	50611	44401	50549	32150	40592
P00414	5289.5	6827.6	6114.3	5315.4	7001.8	6278.1	4883.5	6434.5
P00441	77828	123670	82192	101350	107960	135340	85528	124480
P00450	794430	457020	451850	655570	286270	409260	528770	574120
P00480	7626.6	10812	6636.3	6813.4	29780	11847	6881.1	13163
P00488	369550	470450	281410	455200	292150	394940	306750	303740
P00491	253800	161530	183060	150200	173200	154650	152160	148340
P00492	96052	44495	58542	42179	56119	46580	61780	39498
P00505	250400	151900	245680	151210	328830	193270	175710	167380
P00519	6491.3	6876.9	7300.1	5572.6	6580.3	6117.2	6234.2	7008.4
P42684	6491.3	6876.9	7300.1	5572.6	6580.3	6117.2	6234.2	7008.4
P00533	87782	73112	155400	70311	94704	85659	121790	80612
P00558	1109400	511880	714550	466190	724010	571210	760950	454770
P00568	129730	180560	97441	146020	122830	205590	114640	169080
Q9Y6K8	129730	180560	97441	146020	122830	205590	114640	169080
P00734	560200	366160	359470	478250	250650	411900	470270	485620
P00736	208800	310270	268490	335400	184090	243240	401170	274590
P00738	343000	412750	536770	1297500	312400	580640	1024700	1176500
P00739	20941	23244	17777	29038	16450	28261	46718	52735
P00740	93279	104490	114140	127580	83401	187660	104630	150990
P00742	37753	24716	27704	40174	25797	39590	32870	39322
P00746	36594	49893	43203	50843	44328	63673	51039	57265
P00747	555050	429120	432920	599380	303160	523280	579290	612820
Q15195	555050	429120	432920	599380	303160	523280	579290	612820
Q02325	555050	429120	432920	599380	303160	523280	579290	612820
P00748	55691	58311	47462	84132	30902	51240	53839	59550
P00749	42891	16791	34774	17343	22171	18486	36356	15754
P00750	33495	57612	40346	47722	39465	50910	49343	54401
P00751	337330	409630	355830	589360	264290	404330	572900	593060
P00813	163640	154930	198020	150940	154970	141220	173010	137340
P00915	365360	510570	166980	319290	139490	285450	203600	251920
P00918	84817	125600	67762	107320	60894	106010	61053	83326
P00966	78072	163070	165730	146750	105080	181020	80121	174980
P00973	16300	11203	29432	15264	22321	11397	26938	10912
P01008	353950	436730	331980	535820	307990	558870	417130	670740
P01009	479360	544660	400410	766860	290840	481460	570380	660420
P20848	479360	544660	400410	766860	290840	481460	570380	660420
P01011	336890	146920	177200	204420	124620	161660	206960	207610
P01019	25708	29648	26857	49781	25433	35947	35039	38289
P01023	859320	1077000	535570	1174000	488310	1190800	864500	964710
P01024	1095300	1259000	1041800	1891900	819730	1269700	1511600	1689600
O95568	1095300	1259000	1041800	1891900	819730	1269700	1511600	1689600
P01031	568850	437650	444520	654600	331830	509670	636520	624720
P01033	133220	114670	77881	83113	59248	48208	69418	39812
P01034	60525	73897	68574	71469	69034	80277	69141	63849
P01037	31646	52586	27391	41604	54144	77872	62287	50671
P09228	31646	52586	27391	41604	54144	77872	62287	50671
P01036	31646	52586	27391	41604	54144	77872	62287	50671
P01040	169320	93120	408520	100660	126780	122400	106260	100780
P01042	177190	186350	154990	272430	104810	213910	232120	244640
P01100	677.45	2201.6	1319.9	2293.6	870.6	1688.1	1286.5	1991.6
P01111	36726	28573	35951	23371	28529	22220	32498	22863
P01116	124570	48745	55764	44761	48469	48846	46616	46722
P01130	5428.5	4459.1	5991.2	5639.1	4186.3	5026	4329.3	4932.5
P01137	7646	4443.3	5536.1	3478.7	4333.8	3747.2	4855	3137.6
P01344	6863.5	7921.8	8336.6	10599	6628.8	9079.5	7868	7796.4
P01591	57850	51975	55047	106630	54036	82810	51167	86724
P01594	10413	9842	27524	16739	9587.4	8280.4	6563.7	7333
P01593	10413	9842	27524	16739	9587.4	8280.4	6563.7	7333
P01619	24403	21878	28938	43631	13839	20481	21430	25796
P01700	5987.4	5594.2	6591.5	6756.5	4031.6	5146	5050.7	4879.4
P01699	5987.4	5594.2	6591.5	6756.5	4031.6	5146	5050.7	4879.4
P01701	861.99	789.49	1019.5	1783.5	378.76	772.32	856.88	1252.7
P01709	19540	18813	40259	43845	24820	22831	23235	27606
P01714	9943.1	7812.7	10679	9733.2	5223.6	5783.8	7455	6882.9
P01715	27554	23059	44910	52903	29045	24274	18898	20885
P01717	81100	81098	96920	138270	54725	73646	70155	73481
P01718	81100	81098	96920	138270	54725	73646	70155	73481
P01730	23724	19001	18472	23981	27133	27602	17251	20787
P01742	80808	82036	102330	166730	63676	63602	70143	83773
P01743	7425.8	6335.8	7233.5	6823.4	5672.3	5825.1	7118.2	7025.7
P01766	6687.9	5747.6	5558.3	7490.1	3527.7	4951.3	3986.3	4787.6
P0DP03	71923	64560	77489	95764	43337	43171	44927	55445
P01768	71923	64560	77489	95764	43337	43171	44927	55445
P0DP02	8811.3	10307	13575	21346	6968.1	8921.9	4403.9	8837.3
P01772	8811.3	10307	13575	21346	6968.1	8921.9	4403.9	8837.3
P01780	20169	14401	28092	29601	12977	17344	24831	24485
A0A0B4J1V1	20169	14401	28092	29601	12977	17344	24831	24485
P01763	20169	14401	28092	29601	12977	17344	24831	24485
P01762	20169	14401	28092	29601	12977	17344	24831	24485
P01782	36208	32554	65823	88453	33780	34896	36221	42400
P0DP04	36208	32554	65823	88453	33780	34896	36221	42400
A0A0B4J1X8	36208	32554	65823	88453	33780	34896	36221	42400
P01833	126070	296750	149460	173830	390170	191180	105250	190670
P01859	285940	273620	454270	795950	215000	303870	447810	547030
P01860	163740	154140	254440	413190	197780	234790	246200	329320
P01861	107860	100130	221120	353130	84075	86414	104360	111190
P01871	190730	191210	214040	397780	211920	377090	248850	283360
P01876	216750	210780	282600	597270	203580	374860	202590	296170
P01889	35012	30527	95919	50188	113090	50974	56758	30795
P01893	15448	12250	63856	27002	18459	12642	15109	13184
P17693	15448	12250	63856	27002	18459	12642	15109	13184
P01903	133950	103620	111110	104100	161030	108880	123020	95302
P01906	5234.8	4509.7	5634.9	4445.8	30003	19256	23820	27257
P01909	21922	19405	32294	44685	71072	43738	14394	13613
P01911	60228	55916	61621	61339	96493	76619	114110	108010
P01920	31673	31753	39783	52822	66043	50359	19646	24665
P05538	31673	31753	39783	52822	66043	50359	19646	24665
P02008	14573	19259	7606.2	7314.9	5452.1	6051.1	8001.6	8561.7
P02042	262420	385580	126750	327190	105090	214550	225960	284090
P02100	5761.4	8120.7	3250.5	4159.7	3632.4	3872.8	3139.5	3478.9
P02144	3975	19520	4849.5	8228.5	5088.1	7330.3	6024.5	4391.6
P02452	167160	332910	212040	208890	159180	177260	300800	221290
P02461	207830	238400	233050	166120	139850	129080	274030	128750
P02462	2857.4	3833.7	3389.8	2755.8	2979.2	3789.3	3091.9	3369.4
P29400	2857.4	3833.7	3389.8	2755.8	2979.2	3789.3	3091.9	3369.4
P02511	40770	127850	50595	102270	45405	134240	40910	101180
P02545	648120	775220	762840	654470	690390	800620	768660	718020
P02549	596610	545260	331930	469570	277470	359760	402660	416720
P02647	587030	560240	574160	1086600	371460	850210	699950	831690
P02649	254090	180630	194970	273850	162460	215170	187040	178290
P02652	75195	84638	70701	148850	45838	111640	107010	140730
P02654	18316	11908	8412.9	16312	7183.4	19069	9204.7	11095
P02655	91605	99989	67355	194010	57440	152700	109710	128380
P02656	57231	47104	44247	108450	36738	91195	55360	56494
P02671	405090	450560	417140	844430	256690	957870	511610	742040
P02675	326240	418100	392780	541540	264630	928600	457020	583450
P02679	301300	360080	347250	481580	224930	887280	378680	584410
P02724	1248	2618.2	1428.1	1886.5	811.74	1358.4	1988.8	1495.4
P02730	328700	371330	154080	268320	123170	175120	204520	219510
P02741	23563	27983	37703	63753	52149	27094	31502	32917
P02743	19078	25853	20030	49749	16065	50732	28944	60327
P02745	42883	31237	31280	35192	24423	29048	60128	32070
P02746	45311	36313	30891	40252	23865	30253	70407	38651
P02747	10135	7837.1	7990.3	8809.9	7269	7792.4	13046	10413
P02748	109730	105410	137760	221670	96670	163530	243750	241710
P02749	243950	218060	149190	289510	117490	258600	268630	301920
P02750	69188	73957	64778	110990	51510	91944	102630	122790
P02751	1320600	788300	1423200	567270	555370	634100	898410	519210
P02753	20951	20933	21102	33735	23245	48127	29815	32881
P02760	166260	201860	126030	261390	167750	402180	230790	295340
P02763	21335	54129	22650	68058	27666	81993	72385	122980
P02765	55723	54620	50706	64194	39372	59760	56261	64729
P02766	97537	136090	96677	178520	85427	137540	150990	170680
P02774	344730	344370	261050	446600	172570	330850	365270	460650
P02775	10194	6343	6635.4	6330.8	3765.5	4277.4	4123.4	5813.8
P02786	430700	138880	224290	108150	175560	115610	132200	103500
P02787	937260	1032400	732550	1202500	531730	908310	998020	1111200
P02788	2938400	195530	706630	256630	329880	552450	300160	289530
P02790	174010	238470	201400	395210	129080	206850	296210	299680
P02792	257910	146590	110140	67015	98890	81369	169960	71788
P02794	216900	139960	154770	90596	111160	100610	152440	84423
P02795	80061	72106	99495	38522	40737	104910	110400	42052
P13640	80061	72106	99495	38522	40737	104910	110400	42052
Q8N339	80061	72106	99495	38522	40737	104910	110400	42052
P80294	80061	72106	99495	38522	40737	104910	110400	42052
P04731	80061	72106	99495	38522	40737	104910	110400	42052
P03886	3582.1	2817.9	3069.6	2944.9	4330.4	3061.3	2804.6	2684.1
P03891	13730	9289.6	10337	7011.6	15389	9429.8	7299.3	7706.8
P03897	15978	15201	16155	14829	24236	18308	13793	18144
P03915	25368	22706	25482	21575	33903	25494	26298	27442
P03923	28883	27402	37341	25321	37954	32171	25407	35066
P03950	45041	48674	47399	49047	48952	63291	70319	63657
P03951	94122	84501	85573	104060	65374	79934	114030	108930
P03952	132240	114640	112990	194720	77106	139200	175590	188580
P20718	132240	114640	112990	194720	77106	139200	175590	188580
P03956	36077	23765	31426	23534	20605	16838	28233	17347
P03973	48241	35154	132080	44161	38412	41139	51729	40387
P04003	335140	267270	352830	457660	197070	316700	411560	378130
P04004	266050	180520	201070	336360	116250	205980	262630	245470
P04040	316100	211230	201520	204070	183190	208450	205920	213180
P04049	30929	22556	28722	23505	30597	25049	25855	25041
P04062	146800	87829	110410	85574	91702	76016	94190	76728
P04066	37708	46898	42477	48740	41222	38779	46586	37654
P04070	1061.8	884.5	939.95	1321.4	505.73	1206.4	1003	1486.4
P04075	704390	348740	435750	282160	425860	368170	394690	323790
P04080	58882	57635	60713	59815	61149	67812	52449	70478
P04083	1199900	464010	659650	376210	467590	455370	614570	363720
P04114	1401100	1714300	1243700	2339200	1247800	2825400	2145500	2209200
P04150	72960	55764	70084	53439	58530	53961	50998	55300
P08235	72960	55764	70084	53439	58530	53961	50998	55300
P04155	7282.7	17898	6460.2	11576	8119	20437	5028.7	26026
P04156	17131	25896	22462	24479	17514	27330	19685	28599
P04179	182290	146950	214980	131590	254660	201380	101130	134130
P04180	12951	13039	12382	16140	11630	16327	14068	15656
P04181	16634	15320	24518	14990	28933	15382	15362	12164
P04183	30785	8517.3	28371	7858.5	18283	8952.1	15406	7907.2
P04196	90587	77110	86984	129110	61498	97199	88608	101020
P04216	23006	56916	24206	54840	22626	27142	27821	30326
P04217	105690	106910	88635	161750	61045	105840	129990	130280
P04233	97861	87135	92307	100150	134570	100710	103870	90730
P04259	7863.4	6321.2	16179	6533.8	8771.4	7067.4	7159.6	7848.6
P04264	509150	433580	772520	367790	509110	516370	580790	557890
Q7Z794	509150	433580	772520	367790	509110	516370	580790	557890
P04271	5901.2	10053	4825.6	8825.2	8092.7	16510	6386.7	22967
P04275	408500	678900	375780	602340	356470	660430	352730	530820
P04278	55605	61179	35934	46465	31274	54617	35276	37906
P04350	893.07	1186.1	736.13	632.41	313.55	590.32	501.61	779.92
P04406	419560	279940	426090	249430	368840	285880	519590	271090
P04424	130700	158660	114830	117190	206450	136990	114330	124660
P04439	162080	107780	212940	110920	226990	124650	378180	157900
P04440	12924	12954	9412	11538	17048	12940	9684	13960
P04626	27966	36886	31719	39763	32578	30506	43729	37432
Q15303	27966	36886	31719	39763	32578	30506	43729	37432
Q16584	27966	36886	31719	39763	32578	30506	43729	37432
Q02779	27966	36886	31719	39763	32578	30506	43729	37432
P80192	27966	36886	31719	39763	32578	30506	43729	37432
P04632	122110	147690	140940	140400	197730	139730	174210	123930
Q96L46	122110	147690	140940	140400	197730	139730	174210	123930
P04732	14488	19201	27451	12600	26505	36530	26424	15130
Q93083	14488	19201	27451	12600	26505	36530	26424	15130
P07438	14488	19201	27451	12600	26505	36530	26424	15130
P04733	14488	19201	27451	12600	26505	36530	26424	15130
P04792	186730	286810	176730	235150	174440	240030	119090	206210
P04839	153590	47722	78803	48768	75392	62222	64620	45012
P04843	569130	478270	633070	438420	714130	515010	538700	449840
P04844	283680	243170	315600	224070	392560	254130	305150	202670
P04899	268280	250650	219630	227050	215750	246470	200790	231980
P19087	268280	250650	219630	227050	215750	246470	200790	231980
P11488	268280	250650	219630	227050	215750	246470	200790	231980
A8MTJ3	268280	250650	219630	227050	215750	246470	200790	231980
P04920	2916.9	2114.7	2603.8	2701.1	2971.3	3282.3	2545.6	2871.2
P04921	2442.4	3808	2405	3356.6	2908.3	3869.2	2610.9	3990
Q9UHC6	2442.4	3808	2405	3356.6	2908.3	3869.2	2610.9	3990
P05023	411150	424030	465250	415500	870120	522140	415160	448120
Q13733	411150	424030	465250	415500	870120	522140	415160	448120
P20648	411150	424030	465250	415500	870120	522140	415160	448120
P05026	47999	77490	69449	74075	247160	113740	69419	93573
P05062	92555	229020	91811	102810	200450	184780	101910	166210
P05067	26698	19603	29943	17153	24167	18467	23917	16933
P05089	124850	64675	60284	32522	38957	72303	40216	49695
P05090	73102	62685	73629	113350	64176	104140	105040	108720
P05091	192340	158230	245560	282690	368020	557060	120960	236160
P05106	198690	53869	51538	48566	42288	44310	45583	48988
P05107	555820	111980	233320	128250	161720	164160	160720	130360
P05109	741690	109370	350010	123120	154820	241410	162900	153780
P05121	159510	30805	87353	34771	28600	23297	52041	26507
P05141	171890	100450	130150	84019	288600	112110	144590	94512
Q9H0C2	171890	100450	130150	84019	288600	112110	144590	94512
P05154	61051	79490	56732	76861	54707	75666	75282	83716
P05155	264510	307650	224460	385950	204060	284700	380560	396160
P05156	281700	260430	255360	370950	197460	254860	302320	324610
P05160	45542	33641	37597	61929	26647	51318	45204	53806
P05161	95254	66326	93769	67499	128930	65476	265140	60615
P05162	50091	95234	53106	77783	69219	169290	44281	85225
P05164	669790	131040	299220	144780	155630	205740	173250	171400
P05165	104420	109470	98476	123820	174020	154800	99892	129840
P05166	92435	98578	90604	94037	174340	148700	81448	117050
P05186	16011	16308	14568	12505	12791	15419	13352	16631
P05198	204650	147940	214580	141620	206580	148770	197840	134320
P05204	2547.9	1962.3	1991	2836.1	2017.5	15348	1798.2	12398
Q15651	2547.9	1962.3	1991	2836.1	2017.5	15348	1798.2	12398
P05230	1547.4	1934.6	1223	2233.6	1449.3	1948.8	1689.2	2626.6
P05362	162980	65133	88880	65801	92944	68244	80592	57166
P05386	80958	53850	85727	45339	95026	42754	65661	31194
P05387	70184	57365	75221	51492	77777	54434	64553	51722
P05388	201600	144330	217060	132490	205650	144100	168570	121520
P05412	5362.4	3291.3	3215.8	2992	2900.4	3177.3	3483.3	3200.6
P05413	45319	62190	44022	49360	37501	76738	31455	61543
P05423	7116.3	3224.2	7365.7	3006	6755.4	4071.1	5442.8	3324
P05452	112090	203770	127160	199170	82386	135810	208350	177600
P05455	340450	233060	365470	221760	296580	261350	334090	217840
P05496	3789.5	2530.6	3570.9	2501.3	5223.6	5110.9	3558.6	4178.7
Q06055	3789.5	2530.6	3570.9	2501.3	5223.6	5110.9	3558.6	4178.7
P48201	3789.5	2530.6	3570.9	2501.3	5223.6	5110.9	3558.6	4178.7
P05543	64137	64537	55729	85752	38126	48304	73569	76113
P05546	70184	67278	67181	152550	43102	108340	110650	142990
P05556	429680	371260	323720	307240	264350	341780	267790	344540
P05771	121580	92236	114110	112650	106770	149730	107730	121980
P05129	121580	92236	114110	112650	106770	149730	107730	121980
P05783	160660	324270	282020	256440	715050	283920	214480	229630
Q92764	160660	324270	282020	256440	715050	283920	214480	229630
P05976	12804	11373	11536	9751.1	11861	13446	8909.7	22855
P08590	12804	11373	11536	9751.1	11861	13446	8909.7	22855
P05997	51174	60361	67598	51192	46109	37009	75243	37158
P06127	14951	14554	17440	17235	23701	22604	15587	17400
P06132	66805	61098	57843	47907	53449	53787	57031	48053
P06213	11889	11954	9839.4	9645.2	10976	9529.7	9171.7	9188
P06239	17388	20412	23689	28887	32434	34130	20734	25474
P06276	34527	30118	30757	52042	18232	40453	35950	44351
P06280	103620	64497	80692	58941	67899	55710	66177	52280
P06331	65077	56414	78695	87252	61377	44351	45441	51128
P0DP08	65077	56414	78695	87252	61377	44351	45441	51128
P0DP06	65077	56414	78695	87252	61377	44351	45441	51128
A0A0C4DH41	65077	56414	78695	87252	61377	44351	45441	51128
P01825	65077	56414	78695	87252	61377	44351	45441	51128
P01824	65077	56414	78695	87252	61377	44351	45441	51128
P0DP07	65077	56414	78695	87252	61377	44351	45441	51128
P06396	869140	548820	539430	504890	489180	539340	570770	580570
P06400	24423	16026	26333	14261	20880	14816	25504	13769
P06454	6347.2	18722	9009.2	16419	9087.6	36093	26127	38290
P06493	57575	24965	54607	25811	38705	25295	33679	25903
P06576	269720	238470	254280	238370	378390	276850	236540	263660
P06681	161690	162150	163800	216330	129800	167360	228940	204190
P06702	380600	53099	191020	62833	81194	132820	86884	81399
P06703	203720	161110	192880	152740	219490	180300	297020	165030
P06727	285050	260020	231440	287950	246140	332790	359640	384040
P06729	8364.9	10407	10522	13959	15105	16490	11846	13463
P06730	50408	29745	43582	29234	44836	33550	51032	30147
P06731	13606	6848.9	38698	6422.3	29271	10406	11928	5490.9
P06732	9949	15869	9162.5	8511.1	9147.9	9766.4	9565.6	9770.6
P06733	985060	468200	723380	421320	656930	500860	584680	403490
P06737	633380	329220	502130	283670	250900	370000	318230	287210
P06744	266640	196110	271440	174450	285180	198920	266500	174850
Q8N196	266640	196110	271440	174450	285180	198920	266500	174850
P06746	15339	15894	40936	15658	28647	18412	21979	15048
P06748	617380	204270	365470	193100	261760	204760	276310	176850
P06753	247250	275810	237110	230300	232660	323900	174390	279520
P06756	351910	327610	281020	256920	255140	220390	328280	195460
P06865	152710	168490	177840	148860	167650	123790	168770	124930
Q16778	225030	89178	185560	140700	128780	155230	98095	179180
P06899	225030	89178	185560	140700	128780	155230	98095	179180
P33778	225030	89178	185560	140700	128780	155230	98095	179180
P23527	225030	89178	185560	140700	128780	155230	98095	179180
Q6DRA6	225030	89178	185560	140700	128780	155230	98095	179180
Q6DN03	225030	89178	185560	140700	128780	155230	98095	179180
P07093	107010	428140	211300	336600	185780	165110	168930	111750
P07099	136800	133130	92302	129730	163510	145930	102710	136840
P07108	100240	98496	94608	84054	107230	113920	79255	91045
P07148	58931	199270	44225	52485	43775	172130	76953	92923
P07195	277320	224670	275350	183870	458990	240370	242740	236190
P07196	109670	36162	34847	33688	35627	46445	27908	62668
P07197	109670	36162	34847	33688	35627	46445	27908	62668
P07199	9717.7	6996.1	9676.6	9325.6	6551.5	7686	6593.7	9254
P07203	163620	129950	138610	134220	137560	123700	135150	126410
P07204	17991	9689.4	22413	12832	10571	11318	12229	11930
P07205	17356	8365.9	10532	6689.5	10970	8651.3	11614	6828
P07225	236070	145140	167800	221100	115700	176610	203430	199570
P07237	601080	396020	512670	324920	627100	428230	528310	323470
P07305	137200	61251	60375	52406	54414	66061	54796	67713
P07307	1151.5	1820.4	1320.4	3196.9	1903.7	3377.5	2595	2812.5
P07311	27055	22871	21312	24129	25800	24390	22391	19506
P07327	10685	57066	9099.7	21869	39565	32319	14637	14578
P07332	51372	32832	43485	32929	37927	36487	33401	32327
P07333	12733	13760	12907	14099	13022	14172	11992	14159
P07339	317180	374540	338260	273840	377060	258310	338250	302810
P07355	704580	591220	622850	499320	653070	544690	602240	477740
A6NMY6	704580	591220	622850	499320	653070	544690	602240	477740
P07357	157850	124310	129570	167970	89511	139760	167870	161360
P07358	109080	88218	101800	131920	73628	92565	127750	120300
P07360	59728	46584	45690	68419	34587	46018	69678	64623
P07384	315870	333790	367750	314090	499930	348680	457410	299460
P07437	12466	12579	11340	10169	14268	8011.5	13296	9327
A6NNZ2	12466	12579	11340	10169	14268	8011.5	13296	9327
P07451	29356	77379	21771	42523	20274	38467	22844	33074
P07476	13082	10771	32711	11429	12772	12982	26952	16242
P07585	96138	180020	95212	137350	77188	185430	109830	273560
P07602	262480	262340	211490	192600	197880	319890	214570	351000
P07686	217680	217720	191600	175590	179060	154860	183380	153030
P07711	171450	55614	81593	54579	66832	45283	57067	42864
Q5NE16	171450	55614	81593	54579	66832	45283	57067	42864
P07737	147830	113600	139740	102760	127930	114470	111920	99575
P07738	54146	51489	34190	40257	30189	30677	32397	32963
P07741	93888	84740	98303	93809	98904	91264	91374	87184
P07766	5002.9	7327.1	6595.2	10947	15146	12272	7351.8	9096.2
P07814	714860	615710	769710	537850	798330	570850	677180	490880
P07858	388330	196780	259650	148260	223420	125080	222940	121830
P07900	508660	293420	427790	277720	494850	317060	393190	267170
Q58FG0	508660	293420	427790	277720	494850	317060	393190	267170
Q14568	508660	293420	427790	277720	494850	317060	393190	267170
Q58FG1	508660	293420	427790	277720	494850	317060	393190	267170
P07902	18492	17866	16615	18331	16548	18961	20044	19689
P07910	173880	125600	176840	114660	175240	143340	137200	119030
P0DMR1	173880	125600	176840	114660	175240	143340	137200	119030
O60812	173880	125600	176840	114660	175240	143340	137200	119030
B7ZW38	173880	125600	176840	114660	175240	143340	137200	119030
B2RXH8	173880	125600	176840	114660	175240	143340	137200	119030
Q86SE5	173880	125600	176840	114660	175240	143340	137200	119030
P07919	48749	33005	44241	32133	82135	57963	33120	42572
A0A096LP55	48749	33005	44241	32133	82135	57963	33120	42572
P07942	404000	522620	408310	336340	340440	297120	365350	323350
P07947	7716.3	8906.9	9165.8	8306	10301	8860.3	8688.3	7767
P06241	7716.3	8906.9	9165.8	8306	10301	8860.3	8688.3	7767
P07948	102250	74776	89200	75189	111650	86054	73419	68375
P07951	58042	52743	30993	29757	22774	31014	29269	30190
P07954	210900	152060	181050	155580	340690	186040	167200	171100
P07992	1755.3	1432.5	2066.9	1285.1	2081.6	1611	1899.7	1241.8
P07996	782420	880910	934250	476880	333230	263050	590040	251990
P07998	8242.8	6084.2	3566.3	5009.6	2256.2	7106	5539.1	5726.9
P08047	9480.9	5283.8	10279	7333.7	8585.7	9431.7	6383	8747
P08069	4453	5537.3	7672.6	5289.6	4984.7	5575.1	5041.1	4532.2
P08123	164420	353820	211590	206360	156480	151500	278530	177060
P08133	564730	693070	462280	578720	432480	673570	435610	627060
P08134	22759	24510	21370	20933	26660	21617	29427	18237
P08138	924.6	18597	1763.6	14013	3229	9235.8	2550.4	9557.6
P08174	57837	69659	128740	61820	60804	53107	71444	50510
P08183	28422	35459	27145	34207	67976	44168	20119	29010
P08185	80127	88597	76908	124820	56598	89818	91743	106540
P08195	227270	114760	383090	109580	169240	107380	143600	109300
P08236	122810	80443	99719	74556	86486	78917	73562	72917
P08237	158930	161310	146690	136060	166680	183900	142860	196500
P08238	1107200	399930	759970	367200	709280	412990	547290	364580
Q58FF7	1107200	399930	759970	367200	709280	412990	547290	364580
P08240	134430	120040	156860	100460	153390	112270	124460	90651
P08243	47903	33690	52170	37886	92764	44714	42992	39077
P08246	36694	6331.7	30645	8559.1	13139	27243	10388	16710
P08253	87632	141320	111540	117800	77138	62869	125820	59647
P08294	26339	42012	30574	41747	28764	49837	22642	42843
P08311	136010	51091	124320	60605	59405	88358	64106	74433
P08319	51803	145970	37472	40332	29253	124600	65768	72304
P08397	32204	24909	30141	29392	27687	24803	31058	27077
P08473	97392	39628	60913	39060	43529	46791	79966	44013
P08476	8500.5	11140	10470	9153	7640.3	6679.2	14720	6141.6
P08493	11586	22609	16197	36281	11650	19870	17176	33028
P08519	79408	88566	58712	74340	52111	65054	123900	128380
P08559	134380	125260	156060	129850	279900	166270	140570	142310
P29803	134380	125260	156060	129850	279900	166270	140570	142310
P08567	73500	36304	54950	43694	56781	41581	42399	39375
P08571	83030	57703	44789	52133	52552	46140	50868	40609
P08572	94583	154140	115090	111620	106570	131830	101620	142740
P08574	45544	26954	47487	27881	83396	43158	27295	32715
P08575	700860	330660	468560	401960	483630	479770	369820	394400
P08579	113760	79843	134530	77760	113750	92533	96389	76147
P08581	15052	11094	15397	10002	22148	11329	21703	11695
P08582	42289	26842	30016	23116	24381	22178	52725	23308
P08603	657450	641430	604520	880230	434380	645350	904320	813550
P08621	131830	95708	157260	88492	133270	96523	103780	78559
P08631	43600	21634	30597	25616	30943	25502	26105	18840
P08637	52478	27224	33156	23333	31690	25755	29614	21461
P08648	277800	148240	140060	126900	114890	105460	140920	103450
P08651	10042	7887	9673.9	7215.2	8808.4	9100.9	7032.7	8934.4
P08670	880780	533350	363990	414320	338220	422820	348250	433960
P14136	880780	533350	363990	414320	338220	422820	348250	433960
Q9NSB2	880780	533350	363990	414320	338220	422820	348250	433960
P08697	115820	103860	90534	173830	70475	142720	123840	145440
P08708	75650	55195	88941	58343	91098	48979	77736	49732
P08709	8474.1	7463.3	6923.4	8044.6	7612.9	9167.1	6752.2	9575.5
P08754	22288	18596	20705	17506	16620	16064	16530	15087
P08758	733390	781910	484770	596730	884570	638890	498170	526100
P08865	208900	166140	247650	148570	268150	167770	199770	142160
P08962	39473	21014	24728	20568	24311	25590	20389	19474
P09001	38180	25548	38811	25392	52522	31467	31053	22519
P09012	85169	74585	93670	99309	69980	75676	95641	99276
P09017	4708.6	5117.6	7421.6	6468.2	6548.1	6782.9	6751.6	5195.8
P09104	110080	56356	65911	45356	51178	53350	72571	50841
P13929	110080	56356	65911	45356	51178	53350	72571	50841
P09105	5738.2	7478.7	4578.8	7709.3	5698.1	6280.1	5323.4	5755.9
P09110	83580	86488	83223	80739	163070	93675	114930	81919
P09132	3391.8	3650.3	3312.5	4858.4	6131.2	3430.4	7087.9	2807.3
P09172	10506	11334	9581.6	13261	6821	15133	6871.2	16472
P09210	91331	200110	87786	132810	426220	170920	98292	151830
P09211	122840	132260	199510	141470	200570	131820	107500	103070
P09234	11353	8647.6	13491	9255.3	13703	9310.8	11551	7579.6
P09237	8359.3	16888	8052.8	14671	10486	7854.5	10173	9462.7
P09326	35938	35842	37560	54684	57868	67196	35386	59476
P09327	87488	182820	142570	121220	459890	155370	84047	124560
O75366	87488	182820	142570	121220	459890	155370	84047	124560
P09382	140170	137330	90845	94613	87688	122820	112000	118150
P09417	77630	67381	74959	68287	94665	85818	71138	74913
P09429	230280	166510	235830	204680	244980	228540	235860	184000
B2RPK0	230280	166510	235830	204680	244980	228540	235860	184000
P09455	86717	127050	94841	109660	169050	213190	235750	167780
P09467	128740	120840	107060	109930	128380	127990	105790	108550
O00757	128740	120840	107060	109930	128380	127990	105790	108550
P09471	55030	52385	30187	53551	29156	68921	26202	75682
P09486	95245	165220	124680	118380	78714	80967	132120	61722
P09488	37803	37473	36445	42796	114160	164140	33205	48157
Q03013	37803	37473	36445	42796	114160	164140	33205	48157
P09493	224610	725800	346790	531440	299460	787090	254840	651170
P09496	88158	56658	57790	42402	57220	46317	55348	36618
P09497	48122	63176	48702	49068	59806	49389	68543	38327
P09525	184550	324160	190200	285150	791270	472990	191660	281720
P09543	161130	149040	152030	132600	191300	139770	256720	138580
P09601	293830	83020	94063	71912	130900	81223	78149	72993
P09603	6050.3	3532.1	3724.5	3356.2	5502.7	3115.8	2922.4	3010.5
P09619	57359	114570	68023	85918	73124	89291	66564	83865
P09622	199310	165340	199870	151840	231640	232920	168030	181570
P09651	292300	195130	281710	194930	286740	193760	234130	181200
P09661	45912	32634	49931	30589	43246	34202	38060	28464
P09668	81765	117400	103970	127900	149240	119640	78070	82993
P09669	29110	22521	31938	22562	27231	28676	21733	27069
P09758	24953	29458	73515	40304	44120	34560	45605	29792
P09769	112010	35627	69996	39480	49985	58054	51016	44151
P09871	117060	151240	152770	158150	118740	127570	199690	138670
P09874	341730	214910	406490	250270	427150	338980	245420	272130
P09913	41729	32836	57747	49280	42679	29781	87080	33739
P09914	146850	112960	121310	109300	162400	99514	401400	98992
P09917	233910	85881	125090	103120	109150	106950	99194	81670
P09936	590730	181020	237870	132110	108800	123650	106880	109380
P09958	4058.7	3963.6	7300.1	4084.4	6959.3	5417.9	4566.5	4465.7
P09960	356960	193440	313860	206630	267960	262820	188230	204940
P09972	218740	100480	149510	97200	111620	127570	84093	105840
P0C0L4	651700	657570	567360	1050200	467220	703620	1188700	1242300
P0C0L5	15990	18359	15250	21291	10947	15287	20003	20313
Q71UI9	44949	13425	31769	15411	21335	22190	12503	22691
P0C0S5	44949	13425	31769	15411	21335	22190	12503	22691
Q99878	92239	40059	86631	33970	43443	76269	31738	96989
Q96KK5	92239	40059	86631	33970	43443	76269	31738	96989
Q9BTM1	92239	40059	86631	33970	43443	76269	31738	96989
Q16777	92239	40059	86631	33970	43443	76269	31738	96989
Q6FI13	92239	40059	86631	33970	43443	76269	31738	96989
P0C0S8	92239	40059	86631	33970	43443	76269	31738	96989
Q93077	92239	40059	86631	33970	43443	76269	31738	96989
Q96QV6	92239	40059	86631	33970	43443	76269	31738	96989
P0C2W1	0	0	0	0	0	187.67	0	0
P0C7P0	8712.9	5504.9	9713.2	6252	9790.5	7477.6	8227.9	5586.7
Q9BZD3	4250.5	4108.7	4351.9	4349.2	4999.1	4218.2	4164.7	5230.6
P0CAP2	4250.5	4108.7	4351.9	4349.2	4999.1	4218.2	4164.7	5230.6
P0CG30	9406.2	8692.5	9695.4	8001.3	9634.9	9955.2	9255.7	7095
P0CG29	9406.2	8692.5	9695.4	8001.3	9634.9	9955.2	9255.7	7095
P0CW20	23691	41596	22471	29035	17844	35687	22512	26354
P0CW19	23691	41596	22471	29035	17844	35687	22512	26354
P0CW24	12934	7748.1	16180	6479.1	14843	9186.6	11362	7252.2
P0DI82	17533	15263	16644	14392	17466	15746	16773	15189
P0DI81	17533	15263	16644	14392	17466	15746	16773	15189
P0DJI8	1615.8	1561.6	2706.9	6597.5	1997.9	3137.4	5296.7	4358.4
P0DJI9	17777	14691	44770	131300	18464	29761	58219	71478
P0DMN0	14180	15922	11477	10358	14072	15348	10365	16677
P0DMM9	14180	15922	11477	10358	14072	15348	10365	16677
P0DMV9	502240	306780	468890	295890	480800	396860	349760	326690
P0DMV8	502240	306780	468890	295890	480800	396860	349760	326690
P0DN76	224410	88085	151870	116840	172090	76640	146180	90596
Q01081	224410	88085	151870	116840	172090	76640	146180	90596
Q8WU68	224410	88085	151870	116840	172090	76640	146180	90596
P0DN87	18672	15003	18075	15746	16617	15959	52111	16341
P0DN86	18672	15003	18075	15746	16617	15959	52111	16341
Q6NT52	18672	15003	18075	15746	16617	15959	52111	16341
A6NKQ9	18672	15003	18075	15746	16617	15959	52111	16341
P0DOX2	292860	303090	439980	724990	304850	405830	258400	468090
A0A0J9YVY3	292860	303090	439980	724990	304850	405830	258400	468090
P0DOX3	23910	23953	30291	53734	18337	27634	23831	27882
P01880	23910	23953	30291	53734	18337	27634	23831	27882
P0DOX4	26557	26023	46850	75401	25183	29318	99359	107600
P01854	26557	26023	46850	75401	25183	29318	99359	107600
P0DOX5	732010	650440	869320	898500	503880	427860	520760	597250
P01857	732010	650440	869320	898500	503880	427860	520760	597250
P0DOX6	1472.1	1752.3	11747	18203	4544.7	6033.2	1356	2138.1
A0A0C4DH43	1472.1	1752.3	11747	18203	4544.7	6033.2	1356	2138.1
P0DOX7	239820	229960	302110	389430	198280	221810	217420	273560
P01602	239820	229960	302110	389430	198280	221810	217420	273560
P0DOX8	160800	142140	197460	257380	137380	144700	152960	163140
B9A064	160800	142140	197460	257380	137380	144700	152960	163140
P0CG04	160800	142140	197460	257380	137380	144700	152960	163140
P01706	160800	142140	197460	257380	137380	144700	152960	163140
P01703	160800	142140	197460	257380	137380	144700	152960	163140
P0DOY3	29703	26954	36058	52991	20033	29155	29568	34631
P0DOY2	29703	26954	36058	52991	20033	29155	29568	34631
P0DP25	345850	357380	312850	304570	371920	356910	291730	343460
P0DP24	345850	357380	312850	304570	371920	356910	291730	343460
P0DP23	345850	357380	312850	304570	371920	356910	291730	343460
P27482	345850	357380	312850	304570	371920	356910	291730	343460
P02585	345850	357380	312850	304570	371920	356910	291730	343460
P0DPB6	32297	24764	34377	24597	28741	24168	27927	23397
P10109	2761.8	2551	2651.2	2203.1	3418.1	3225.7	2311.8	2290.4
P10114	5650.4	5324.2	4513.9	5283.2	5877	5299.1	5004.7	5628.2
P10145	25618	2136.5	7883.8	2048.8	4806.4	2825.9	4336.6	2281.3
P10155	85677	85184	99112	77467	107420	84885	93227	80435
P10176	21772	18207	23689	17833	20966	22988	17657	20852
P10253	152600	156270	157450	132280	223390	147630	150150	141450
P10301	178370	217120	193570	200160	186190	261920	166160	253110
P10321	130210	86161	181410	95406	109560	67490	120390	65008
P10398	35038	29178	29586	29685	39067	30011	32903	29837
P10412	195730	99282	74718	96868	72206	149990	70345	149110
P10451	26081	34317	24104	33868	72993	38686	25635	31898
P10515	104050	89173	116480	90239	182100	118530	96912	97147
P10586	85249	54979	91322	62167	164940	84074	66702	59543
P23468	85249	54979	91322	62167	164940	84074	66702	59543
P10588	1014.7	956.71	1116.4	1014.6	1297.3	1146.5	956.07	991.1
P10599	220090	118480	179020	102980	161660	107100	151590	91806
P10600	8864.9	17686	9266.4	12931	9184.8	10694	11173	9655.3
P10606	122160	96479	125430	97319	106700	132770	94289	115780
P10619	98109	104990	118150	81728	97301	71812	90731	75808
P10620	56424	38311	44986	39621	146710	75760	43092	47014
P10636	1321.4	1837.3	1626.9	2361.5	1846.9	3793.7	1299.2	5026.7
P10643	118020	151720	122870	225070	108220	170790	157550	220520
P10644	119300	82789	92635	81753	101930	94597	78789	85017
P10646	15246	13307	17544	14434	11666	13914	12810	14186
P10768	76858	83450	79886	75115	87054	104450	72422	79100
P10809	793880	323650	597330	305930	718450	412670	467740	317220
P10909	113420	119680	90316	162010	73069	128150	117600	145150
P10915	16095	13091	25208	13820	24554	17907	14996	12571
P11021	650780	404160	626340	381950	592600	495660	624160	383480
P11047	448270	777970	534990	479440	382380	492610	427520	590330
P11117	22438	12674	15451	11603	14133	9912.8	12662	9809.1
P11142	649050	427840	592950	368630	540290	442850	514670	382180
P11166	175020	70279	125640	65853	85385	55631	178250	66835
P11169	136480	29621	42966	28010	38282	33937	132650	27713
Q8TDB8	136480	29621	42966	28010	38282	33937	132650	27713
P11171	106300	92814	76525	97728	107700	85948	78432	85880
P11172	78324	55478	94273	60088	83085	62324	64375	54668
P11177	83130	82357	91138	80466	166480	94559	81469	80800
P11182	77361	72380	100950	74926	119790	111380	78874	85562
P11215	598820	112310	235380	124050	137300	170730	160790	125460
Q13349	598820	112310	235380	124050	137300	170730	160790	125460
P11216	281190	318220	479830	284480	555210	440550	313450	323860
P11217	8365.7	15064	9640.8	13630	8514.1	24897	7857.6	28951
P11226	946.93	582.27	905.96	1911.7	1205.9	913.51	1641.5	963.91
P11233	23690	21347	28186	19135	22339	23359	24652	19210
P11234	104710	79321	84101	68699	80590	73345	101160	66509
P11274	8603.8	7021.9	9668.9	7940.7	9410.6	7055.8	7030.4	6112.3
P11277	460180	428180	260960	391630	214910	314180	320650	378400
P11279	6564	7369.2	6643.4	5936.4	6053.7	7187.1	6379.4	5647.6
P11310	93634	86319	104280	92718	145730	131750	84437	97394
P11387	227990	96019	237560	101640	188440	133080	140930	111910
Q969P6	227990	96019	237560	101640	188440	133080	140930	111910
P11388	179670	50988	188430	56299	101500	56802	147080	57548
P11413	975830	391200	404230	357400	936520	371530	418610	322280
P11441	36124	27661	32645	28617	40447	28858	33236	27043
P11498	70398	59706	74428	57910	122340	71092	51015	71404
P11532	64758	95842	67623	84529	67886	125660	51694	146980
Q13474	64758	95842	67623	84529	67886	125660	51694	146980
P11586	383170	317890	323820	267910	417460	306780	312380	277610
P11597	3742.2	3500.8	3242.2	3618.3	3392.8	3599.7	3745.6	3260.1
P11678	170990	223330	194470	167120	191920	321510	441040	194950
P11717	796720	288990	399230	259220	317330	265910	341760	253280
P11766	202780	227910	194450	206980	213890	257430	184170	243680
P11802	19745	15939	15758	15709	16628	16231	13349	18462
P11836	13494	12712	15473	29211	23662	31516	12454	28211
P11908	64259	39401	56350	37726	56597	44478	47570	39532
P11912	8246.9	7654.2	10960	9855.6	10959	10438	8318.7	9696.9
P11940	434680	229370	440850	214800	367110	241990	293420	207710
Q9H361	434680	229370	440850	214800	367110	241990	293420	207710
Q4VXU2	434680	229370	440850	214800	367110	241990	293420	207710
Q96DU9	434680	229370	440850	214800	367110	241990	293420	207710
P12004	127400	68768	169470	70424	138020	81148	139080	68954
P12074	5294	3382.9	4065.9	3844.6	4747.6	4171.6	3814.1	3850.9
P12081	282030	167160	199110	149100	185110	155280	190240	143640
P12109	149120	403010	187390	320060	179480	436800	212620	612960
P12110	119050	291060	135860	220740	139210	307910	153760	429260
P12111	767820	1482400	860330	1118700	798530	1494400	853030	1812800
P12235	43912	59961	46028	52688	69195	66033	39764	68791
P12236	287550	173220	225090	129300	327670	161980	172120	144020
P12259	71010	51469	58856	62543	51357	83829	58285	62680
P12268	193970	150920	179860	129680	195430	128670	171470	111710
P12270	847740	573110	915170	544950	759780	610940	662040	533960
P12277	109310	304970	142800	241170	201730	627130	88761	919820
P12314	22102	15553	16144	11405	20823	10946	13722	8087.9
Q92637	22102	15553	16144	11405	20823	10946	13722	8087.9
P12318	37328	16225	18665	17205	14499	14344	16159	13710
P12429	440030	84626	245570	89524	133450	139550	169460	104580
P12532	13107	15911	20841	18383	28129	24524	12325	21075
P12544	19659	13347	21842	18049	20521	16396	17032	16758
P12694	7401.2	7973.4	7570.8	9134.1	10973	13265	11071	12445
P12724	8874.6	2834.9	3233.5	1699.6	4118.9	7459	12004	4749.9
P12814	376620	577730	385210	424770	304630	461470	328180	386390
P35609	376620	577730	385210	424770	304630	461470	328180	386390
Q08043	376620	577730	385210	424770	304630	461470	328180	386390
P12821	81086	54251	54389	48215	50497	53544	62061	47882
P12830	25537	46341	86850	49126	98139	54259	71631	43045
P12838	32733	6538.5	21422	8641.6	14465	33282	11935	15185
P12931	48422	51739	57066	50291	83790	59455	47029	46325
P12955	81793	84831	86607	74505	86791	75354	93246	72441
P12956	350950	250940	404370	236070	356440	289140	272160	234530
P13010	318800	238010	384020	231670	344420	278770	261560	222630
P13051	7803.8	5251.7	8845.4	5709.7	10054	6708.1	5804.5	5644.9
P13073	136040	98220	127520	94032	147710	122570	89255	99220
P13224	14387	7933.5	5067.1	6203.3	5489.5	5968.8	6013.5	7674.4
P13284	16055	12105	11746	10472	11311	9779.2	12500	11002
P13473	35366	26980	29892	22499	36670	36512	29773	22672
P13489	242980	265810	247380	231930	232530	240200	211110	216600
P13497	4344.7	2423	3818.6	2272.2	2748.6	1425.7	5796.4	1756.6
P13498	52550	15114	28947	15515	25713	22091	22272	15823
P13521	4303.6	3942.8	4130.3	3465.6	3403.8	11369	3092.8	9464.9
P13569	26154	25095	28596	27350	144760	51683	27107	26943
P13591	44923	55630	49744	50920	40989	115080	46887	133510
P13611	91536	447570	126070	258940	138820	129300	256890	109960
P13612	49790	26967	30524	27531	34794	27242	23254	26655
P13639	838330	537070	825830	484470	752660	556010	667800	458820
P13667	616120	489410	691730	501880	818760	670670	824500	529980
P13671	165000	134360	163800	274650	115010	208220	284210	271150
P13674	396850	184300	300820	133710	168060	118050	303470	108850
P13693	115360	89147	113300	73361	100980	88207	117820	76016
Q56UQ5	115360	89147	113300	73361	100980	88207	117820	76016
Q9HAU6	115360	89147	113300	73361	100980	88207	117820	76016
P13716	41819	49260	35401	45528	36968	46308	33853	43545
P13726	17747	14392	28845	15844	20757	18815	42120	15161
P13727	19338	23231	18392	20795	21694	43982	28541	25083
P13747	11059	10319	14705	13200	17097	13434	10199	10179
P13762	46400	51403	33721	34332	45227	31813	23977	20562
P13765	867.06	1025.7	1539.1	2895.4	2358.7	3081.4	1244.7	1778.2
P13796	498470	275790	380130	334010	388750	388750	318100	304550
P13797	571960	716320	669510	632630	593030	530230	662460	425450
P13798	116170	109760	121350	97826	146810	104440	123760	94123
P13804	278730	237100	285950	244600	773140	359070	250890	275940
P13807	99645	64786	105360	64215	80763	69728	93990	68628
P54840	99645	64786	105360	64215	80763	69728	93990	68628
P13861	169590	194860	189280	181410	213070	207740	166870	184420
P13866	20422	21637	20846	21490	66954	55824	20094	25699
Q9NY91	20422	21637	20846	21490	66954	55824	20094	25699
P13928	5435.7	4307.4	5055.8	4255	4817.3	3934.4	10256	4660
P13984	86013	51848	92179	52169	74201	58098	79757	50294
P13987	20632	24467	20641	20727	22170	23543	18760	19401
P13995	3452.6	2474.9	2677.7	3172.9	3197.9	2858.1	2854.6	3071.6
P14091	21316	45797	24136	31124	21033	28614	19996	41375
P14174	35642	29526	28411	27672	34309	26720	26048	26216
P14207	57490	59117	37978	63886	43147	48674	44785	39581
P41439	57490	59117	37978	63886	43147	48674	44785	39581
P14209	20875	33525	23157	22611	13430	22533	19712	24966
P14210	41832	13647	13660	15386	13338	10472	9241.7	11547
P14222	8546.7	10292	9300.8	9792.4	8623.9	7366.2	8180.3	8056
P14314	286900	238340	284060	225180	269920	246550	263210	211120
P14317	124770	96333	97956	121660	119420	111550	100380	111820
P14324	67710	56351	67256	53608	88587	71983	56946	51759
P14384	24590	21501	17633	17486	26067	16729	13104	19804
P14406	21609	18966	25048	16810	17613	21188	13565	19265
P14543	237260	348550	261390	254270	179490	226060	206250	276140
P14550	241120	272650	282980	261770	418590	304900	229050	251860
P14555	39712	58746	68885	103840	47738	67657	45157	74146
P14618	927560	520230	687510	440330	654980	461060	676130	415900
P14625	738720	554890	866250	563060	969090	710330	727760	595710
P14649	12215	9999.2	9505	8767.4	11004	10382	8428.8	16948
P63162	49884	39820	54667	38612	51930	43785	45134	44305
P14678	49884	39820	54667	38612	51930	43785	45134	44305
P14735	227950	160650	200050	156450	198280	159060	168210	150080
P14780	643050	111410	284940	135750	141780	242130	123490	144260
P14854	76363	71882	85262	66380	89097	92226	65369	70835
P14859	19454	13696	26941	15089	23187	18441	17253	16419
Q9UKI9	19454	13696	26941	15089	23187	18441	17253	16419
P09086	19454	13696	26941	15089	23187	18441	17253	16419
P14866	278930	190820	300560	212050	296530	221620	253300	189610
P14868	486460	317700	507570	310340	396300	335460	434080	296940
P14902	30387	22975	82221	26934	131290	29904	40300	27650
P14923	143060	154750	334070	156760	259510	166030	374670	147790
P14927	31239	21901	32043	21238	63385	31430	21221	26555
P15056	2546.5	2670.1	2004.3	2262.1	2853.2	3115.6	2466	2110.2
P15088	39232	95298	83219	79942	55061	90110	77144	116080
P15090	115880	364700	277080	226310	135070	354200	100930	530560
P02689	115880	364700	277080	226310	135070	354200	100930	530560
P15104	93943	65394	97315	58325	88607	74190	77776	58367
P15121	271950	186420	169010	163270	204570	163420	145510	158150
P15144	923840	263120	257000	244360	439770	317340	212450	208350
P15151	13078	9443.2	13280	7576.2	10330	6888.8	10648	7378.9
P15153	33222	16979	28165	30450	24253	29682	24973	28266
P15169	24409	27501	28883	45662	22355	36032	27093	30838
P15170	234830	168380	191240	143680	206990	149760	179710	128210
P15259	17881	25336	28044	20432	22730	41288	17758	34169
P15260	10029	7817.4	12466	8217.9	9295.8	9170.9	8228.9	9995.9
P15289	53808	63542	64518	59348	69336	60098	66438	63955
P15291	16785	12832	17269	11693	17490	14969	18318	20917
P15311	219450	140920	392340	149960	298230	173070	551010	145040
P15336	4787.4	4608.5	5014.4	4813	5182.3	5053.5	5152.4	4932
P17544	4787.4	4608.5	5014.4	4813	5182.3	5053.5	5152.4	4932
P15374	70862	74681	70249	68542	75462	64154	99225	65099
P15407	2795.4	847.12	2162.7	933.59	937.05	957.32	1246	888.81
P15428	4427.3	6540.2	4236.8	4422.8	8037.6	6970.7	4735	4775.8
P15498	130640	92739	100860	101930	116390	107480	97572	95412
Q9UKW4	130640	92739	100860	101930	116390	107480	97572	95412
P15514	9096.5	5927.5	21292	6253.8	7340.9	6221.5	5427	5117.1
P15529	34145	33618	63307	34536	71893	43580	41273	30623
P15531	295640	134510	164110	109910	151880	108170	141800	102070
P15559	160940	110790	120470	166950	244900	155630	128310	133960
P15586	107770	70385	77016	60518	66537	59007	53273	61160
P15735	11706	9452.9	12120	11394	10949	10872	10349	9339.9
P15848	15029	19059	15017	15921	12503	15416	13685	15500
Q5FYB1	15029	19059	15017	15921	12503	15416	13685	15500
P15880	198070	159080	237420	149540	309370	103090	240100	97965
P15884	33107	32013	41644	28745	39505	35268	34736	31770
Q99081	33107	32013	41644	28745	39505	35268	34736	31770
P15907	14870	11051	20156	14864	30913	16685	15620	15109
P15924	355880	443930	1221500	448730	1123300	436810	718680	400650
P15927	129170	90687	160420	89576	129320	102280	101040	90544
P15941	22170	43065	44255	41365	76479	35889	37720	29550
P15954	41615	31011	42590	29425	37991	45148	26760	34935
P16035	54584	42920	30172	33811	22150	25866	40933	23460
P16050	63938	73720	72019	83513	62147	106020	111710	76590
P16070	57192	39531	47235	43039	45878	47509	48728	45058
P16083	44433	38681	44086	47703	73861	81324	34951	43277
P16104	11355	13123	12364	14080	16002	16220	11844	20313
P16109	10434	13187	7814.3	12613	7093.9	14376	8289.5	14033
P16144	209020	237810	789100	238610	337320	284890	634780	265920
P16152	224200	179220	176370	187420	285390	215580	166670	173300
P16157	246320	235090	135870	204870	116000	148690	170510	183520
P16219	117300	113780	128040	108110	195800	183680	97444	137170
P16220	54640	29947	45658	32066	42144	35272	39817	28649
P18846	54640	29947	45658	32066	42144	35272	39817	28649
P16234	1768.5	7049	2495	7356.8	3383.3	6580.4	8258.4	9578.5
P16278	87877	79963	87452	72752	81099	67296	76995	70628
Q6UWU2	87877	79963	87452	72752	81099	67296	76995	70628
P16284	210780	211860	157880	179790	156430	181440	134410	182310
P16298	8347.2	6256.5	8912.7	8532.6	6963	6548.7	6156.3	7451.7
P16333	95314	87461	123310	83604	102990	97971	79734	83961
P16383	1295.2	922.59	1494.3	1075	1551.8	1332.6	1097.3	1142
P16401	141480	37534	33598	33816	26767	41225	31351	42193
P16402	9633.1	5326.6	5502.3	5923.9	4907.9	8084.3	5790.4	7425.4
P22492	9633.1	5326.6	5502.3	5923.9	4907.9	8084.3	5790.4	7425.4
P16403	11313	3321.2	3866.9	3751.7	3564.8	5786.9	3405.8	4504.3
P16422	11851	18079	48684	19759	52835	20053	29513	18218
P16435	160770	147500	158090	129940	172740	141290	149170	131630
P16444	16309	37812	18487	22868	25759	37542	18996	36670
P16452	33082	33542	17414	30276	12792	19772	21984	25554
P16455	12100	16876	20286	20502	19627	22331	14098	22238
P16591	2308.6	2195.3	2283.4	1842.1	2370.1	2448.8	2190.4	2037.4
P16615	638190	488000	637440	498310	836070	575640	547310	474760
P16671	48808	81177	43794	53513	41669	78838	43555	130640
P16885	215130	150330	219980	180880	251990	218620	154690	195500
P16930	102700	82975	87825	62092	91696	93751	81618	84606
P16949	140110	74155	91039	66071	118990	81866	109780	73600
Q9H169	140110	74155	91039	66071	118990	81866	109780	73600
P16989	11031	9998.5	22372	8585.2	12504	7784.8	13834	7396.4
P17026	6347.7	7290.6	7115	9298.4	8863.8	8973.4	5188.6	7785.5
P17050	73283	86677	65993	70386	66910	65624	59880	63599
P17066	6206.5	3875	5169.3	4104.3	5504.1	4009	4722.6	3695.6
P48741	6206.5	3875	5169.3	4104.3	5504.1	4009	4722.6	3695.6
P17096	22102	9902.7	16378	16031	20119	29365	18803	27552
P17174	130070	124460	122170	106180	187470	139000	103480	154520
P17213	150300	44849	202960	57102	62643	89870	61612	62560
P17252	149130	120580	107250	104000	107220	121040	109280	121660
P17275	22003	9832.2	20921	10265	12726	12395	14794	9703.7
P17301	137270	80957	142680	70534	95198	67655	130120	71086
P17302	6400.2	4234.2	6129.9	3900.9	7893.3	3811.7	5321.5	7291.8
P17405	12879	9796.3	10155	9442.5	12066	10050	11545	9532.5
P17480	56361	36364	45868	38546	57001	47804	41845	43417
P17516	14961	19268	15200	23026	46137	27202	16731	32076
P17535	5853	4413.5	5865.9	5447.6	6082.1	4939.9	5166.7	4987.5
P17540	3122	3495.6	3345.9	3418.1	4316.6	3741.5	3062.6	3473.5
P17568	39513	35330	43254	39058	52569	42981	35723	41550
P17612	9575.8	9145.7	9471.7	8551.3	9775.1	8825.1	7907.9	8905.8
P17655	278330	300540	306090	275380	432620	296080	336460	241640
P17661	101200	464260	158160	381680	112760	363490	96846	501750
P17676	30041	7375.9	17939	9467.6	12180	10705	11148	8290.6
P17677	30992	18334	7163.2	12193	5600.7	22984	6415.8	20101
P17706	3274.5	2574.9	3397.8	3165.2	3519.3	3139.4	3475.3	2850.8
P17812	151760	111830	139880	92371	110270	102910	120690	91028
P17813	71698	76734	56587	72062	53407	58489	60650	60409
P17844	148350	70256	133630	66063	121290	84270	118350	63411
P17858	145390	159170	150950	133970	169940	150000	144620	114290
P17900	36542	30350	55390	29192	36601	35039	28562	35336
P17927	58352	17815	22722	19413	23555	30129	18489	23482
Q2VPA4	58352	17815	22722	19413	23555	30129	18489	23482
P17931	89771	96800	105350	90549	162490	112130	109990	86772
P17936	43417	43760	47959	62156	28082	32614	47149	29898
P17948	43102	51205	36060	39030	34647	34820	30851	29010
P17980	251670	209290	244150	193510	271390	200930	278810	177240
P17987	318820	198490	275400	184600	242360	191110	232120	182340
P18031	97512	64197	128510	66214	125040	74365	116650	61266
P18065	16097	14398	11882	16235	11317	16373	11980	11755
P18074	45951	21514	36592	21697	28861	24265	22983	20904
P18077	100730	87196	112200	76839	115580	80218	94070	67318
P18084	109160	120390	92138	94844	88940	66798	101450	62099
P18085	73396	86202	81118	63183	95852	64356	92699	45932
P18124	78855	69362	81845	60482	82267	45077	85774	35356
P18206	853020	1374000	937460	1072300	807270	1455200	801410	1315900
P18283	81679	155770	106430	176570	322000	221460	86937	151660
P18428	304290	304620	432590	628420	234270	454640	640710	544320
P18433	22523	28731	24465	26253	23091	26083	22449	24355
P18440	34138	39179	34803	35269	49957	41630	33571	26861
P18564	40722	36148	44615	32087	41967	37983	84214	33535
P18583	125020	100840	145070	112990	135830	115380	140520	102280
P18615	24111	15771	26801	17668	21974	15803	19352	14133
P18621	41435	34804	42793	33856	52173	28691	42484	31020
P18669	268070	175310	198550	163840	179950	175010	187620	171730
Q8N0Y7	268070	175310	198550	163840	179950	175010	187620	171730
P18754	141050	95054	166650	103690	138470	113320	110100	94695
P18827	4773.1	3938.4	8542.3	4538.6	6241.9	5087.3	4635	5300.8
P18858	26164	17234	34747	15357	27187	18859	24819	15422
P18859	81791	69284	70104	74041	136040	80312	71647	75521
P18887	23407	16980	30333	15437	28085	18116	22721	15378
P19021	7311.5	6688	7190.9	5339.9	6518.2	5948	8242.5	5264.8
P19075	7020.2	16170	16663	16296	28075	23532	7275.2	16744
P19086	5767	12346	7058.6	14734	9926.5	14897	6190.7	17809
P19174	60002	62425	73670	57983	71037	65870	67335	55577
P19224	73603	76696	76955	85698	424400	171650	82437	77945
Q9HAW9	73603	76696	76955	85698	424400	171650	82437	77945
Q9HAW7	73603	76696	76955	85698	424400	171650	82437	77945
O60656	73603	76696	76955	85698	424400	171650	82437	77945
P22309	73603	76696	76955	85698	424400	171650	82437	77945
P35504	73603	76696	76955	85698	424400	171650	82437	77945
P35503	73603	76696	76955	85698	424400	171650	82437	77945
P22310	73603	76696	76955	85698	424400	171650	82437	77945
P19320	24171	20505	27052	23494	35758	36365	24245	25728
P19338	402130	222810	436580	212430	308170	244400	331650	214800
P19367	399420	223670	247870	205690	273000	220910	217500	204670
P19387	41415	32959	44875	35752	42139	38326	33247	33040
P19388	39777	25968	48262	24858	37940	31404	33798	27004
P19397	15434	10334	10807	10766	12106	13198	9415.9	11946
P19404	58617	44971	56819	44888	78525	58263	41924	51973
P19440	26669	22830	17928	25922	40070	19532	18448	26091
A6NGU5	26669	22830	17928	25922	40070	19532	18448	26091
P36268	26669	22830	17928	25922	40070	19532	18448	26091
P19447	3513.7	1650.1	1993.9	1382.3	2599.3	1217.7	3020.4	1152.7
P19474	95155	74371	74200	74576	84021	81337	99321	71609
P19525	112600	76513	116910	77416	118210	79910	188990	73422
P19623	93291	98043	109000	84743	102210	73925	84005	69055
P19634	8741.2	8051.7	7595.4	7415.5	8133.1	6935.2	7780.4	8752.2
P19652	82412	170890	80809	176870	72291	178960	215270	295390
P19784	81530	45922	68283	41001	73049	47318	59232	43538
P19823	318460	263560	226160	305950	207210	272390	399090	279130
P19827	278030	258410	211290	277520	172600	243090	596520	266390
P19838	111470	99704	118970	101090	121490	119190	103170	102060
P19878	237970	92955	162110	92123	114040	125270	143950	103330
P19971	279830	135810	260370	135920	284400	132320	254000	125610
P20020	108880	64114	78368	62296	82358	72584	68682	70940
P20023	15172	10635	16984	19585	33248	22433	13553	23125
P20036	10991	12853	10206	11006	23717	17727	11441	11815
P20042	157830	112380	161400	114150	181360	122120	161870	108760
P20061	25777	9978.9	15586	10223	11339	14021	7087.3	11039
P20073	218550	161120	165870	151610	159960	184580	142150	167000
P20160	78783	16317	32402	16933	15063	21923	20993	18650
P20231	43154	51710	55941	66126	53371	113530	47858	170580
Q15661	43154	51710	55941	66126	53371	113530	47858	170580
Q9BZJ3	43154	51710	55941	66126	53371	113530	47858	170580
P20273	1729.4	1800.7	1661.5	2491.4	2170.5	3335.6	1751.6	2324.6
P20290	37945	18898	26958	25521	25482	17987	35623	19198
P20292	54837	14944	26905	15893	23468	23303	22701	15698
P20336	12933	7403.9	11299	7788.4	12571	9015.3	11111	7847.1
P20337	10163	8104.6	4744.2	7480.9	11989	7419.2	7229.8	8418.1
P20338	16861	14621	17287	13253	21615	13059	13228	11773
P20339	46642	39426	39694	36491	51467	37357	39910	32788
P20340	233720	210150	235900	184740	251960	209170	217470	184200
Q9NRW1	233720	210150	235900	184740	251960	209170	217470	184200
Q14964	233720	210150	235900	184740	251960	209170	217470	184200
P20585	20039	14314	22760	12676	21063	14721	16223	12265
P20591	180810	107990	157920	106100	271410	103940	707240	107160
P20592	91807	70667	71981	71415	85843	74244	225430	64638
P20618	86805	56152	74241	51841	81629	54034	76809	48469
P20645	87643	49736	75341	44995	64571	44889	60798	40066
P20671	14132	2652.8	8909.8	4543.8	5766.1	7905	3255.6	7938.9
Q7L7L0	14132	2652.8	8909.8	4543.8	5766.1	7905	3255.6	7938.9
P04908	14132	2652.8	8909.8	4543.8	5766.1	7905	3255.6	7938.9
P20674	17594	15032	22862	14150	22121	18851	14649	17760
P20700	382830	276760	360760	274660	336500	324380	295080	260600
P20701	134560	95374	107370	115570	129540	129410	102890	119090
P20702	197230	82224	116110	85143	109460	87215	96360	81020
P20742	96930	85730	77905	149950	56626	122720	79896	86360
P20774	14237	40297	16604	33265	20258	56899	19436	124420
P20810	255740	250150	289840	233440	211810	275500	321240	286680
P20839	36416	33839	33370	28407	29161	27813	33221	25100
P20851	73988	53942	71163	86436	46642	65387	89096	75665
P20908	69982	103750	105070	67450	65372	49357	111970	52054
P20929	9734.2	5984.8	8924.4	6766.3	8195.4	7559.7	8534.9	6608.2
P20933	112980	83197	93316	108610	76019	83309	95200	111570
P20936	82832	54089	52639	47158	47033	44123	63031	42131
P20962	11516	29637	11889	14478	10731	31546	14424	39116
P21108	23506	5188.8	10930	4952.9	6228.8	5594.2	5502.9	4569.6
P21127	121960	90276	135900	94859	116390	99461	100760	91943
[truncated: 5,669 more rows]

## Sheet: Phosphoproteome
Proteins	Positions	Amino acid	P1		P2		P3		P4
			CCA1	NAT1	CCA2	NAT2	CCA3	NAT3	CCA4	NAT4
A0A0B4J274	73	S	6773.7	17004	6260.7	10921	5840.1	8793.2	10683	5661.7
A0A0B4J2F2	435	S	1877.4	1657.6	1578	1667.3	1228.7	1366.7	1947	1145.8
P57059	435	S	1877.4	1657.6	1578	1667.3	1228.7	1366.7	1947	1145.8
A0A0B4J2F2	575	S	4979.3	2386.2	2733.1	2317.3	3533.5	3805.4	3145.1	2992.1
P57059	575	S	4979.3	2386.2	2733.1	2317.3	3533.5	3805.4	3145.1	2992.1
A0A1B0GWH4	244	S	3268.5	2215.5	2160	1945.7	2644.8	1992.9	2456.8	2424.6
A0A1B0GTS1	244	S	3268.5	2215.5	2160	1945.7	2644.8	1992.9	2456.8	2424.6
A0A1B0GWH4	248	S	3268.5	2215.5	2160	1945.7	2644.8	1992.9	2456.8	2424.6
A0A1B0GTS1	248	S	3268.5	2215.5	2160	1945.7	2644.8	1992.9	2456.8	2424.6
A0FGR8	755	S	8297.7	10453	7673	11120	7140.6	11729	10648	15008
A0FGR8	758	S	23209.8	36222.7	25454.9	33493.2	25742.8	46222.6	29439.9	51406.7
A0FGR8	761	S	22470.6	20002.2	18889.9	19704.5	19580	22407.4	22041.7	24472.4
A0FGR8	691	S	26189.2	44513	29086.7	41465	31491	60322	34833	50323
A0FGR8	693	S	17676	26498	19873	22865	20337	29043	20193	21907
A0FGR8	743	S	4072.6	5265.4	5667.7	4934.3	5463	5471.8	8443.8	5136.6
A0JNW5	414	S	17138	8771.3	13583	8955.2	10539	11254	13850	8874.6
A0JNW5	418	S	10058	6679.7	7497.2	6530.3	8648.1	7598.5	8947.5	6596.2
A0JNW5	774	S	19117	9602.7	9052.8	10632	11915	9419.5	11079	9832.5
A0MZ66	494	S	27602	27357	33773	23860	35808	29098	27379	25406
A0MZ66	506	S	2730.3	2241.3	3029.6	2977.9	3561.4	3330.8	2894.2	2830.2
A0MZ66	534	S	7638.6	5267.9	9728	5003.2	7099.1	6088.1	6466.7	5374.3
A1A4S6	591	S	11267	11000	9815.8	10860	10164	10875	12559	10937
A1L390	1079	S	13475	11686	15124	14661	14598	16377	16599	15181
A1L390	1081	S	23478	13108	19453	13667	15564	16819	18025	13147
A1L390	1037	S	6528.3	9613.8	5924.4	9690.6	8679.9	13297	16295	12531
A1L390	1040	S	6528.3	9613.8	5924.4	9690.6	8679.9	13297	16295	12531
A1L390	643	S	572.04	471.31	482.44	511.32	800.1	610.27	1021.3	688.99
A1X283	291	S	39482	25540	31862	21153	24800	26990	36090	22660
A1X283	293	S	72160	43342	44895	36134	39548	39660	53855	32542
A2A2Y4	365	S	6835.7	4338.4	6280.5	3901.2	3974.8	3505.5	5467.8	3907.4
A2A2Y4	366	S	6835.7	4338.4	6280.5	3901.2	3974.8	3505.5	5467.8	3907.4
A2A3K4	438	S	11458	14153	12456	12137	9207.5	11844	14511	10867
A2A3K4	394	S	35221	16674	16431	13986	14345	15684	22811	14457
Q99755	458	S	9814.3	6654	8156.9	4631.2	6452.3	4807.3	8000	3727.1
A2A3N6	405	S	9814.3	6654	8156.9	4631.2	6452.3	4807.3	8000	3727.1
A2RRP1	473	S	66455.9	55752	71247	46475.2	66172	60704	72601	49356
A2RRP1	475	S	9166.9	11219	10052	9090.2	12291	10429	10796	8766
A2RRP1	1937	S	3920	4386.2	3160.1	2707	4503.2	7004.8	5814.6	4485.4
A2RUB6	669	S	7222	8378.4	6689.4	10302	5854.2	17743	5627.7	18712
A2RUQ5	64	S	3368.6	2023.1	3065.9	2439.4	3201.8	1958	3110.4	2167.9
A3KN83	212	S	8763	7039.1	12969	12390	11203	9137.3	12234	9721.5
A4D1P6	277	S	6755.4	7533.6	8442.8	9816	10198	14426	11050	10177
Q8IX94	138	S	12494	7892.3	9482.8	6547.3	12970	9860.3	9343.5	8417.7
P0CG41	138	S	12494	7892.3	9482.8	6547.3	12970	9860.3	9343.5	8417.7
A4FU28	138	S	12494	7892.3	9482.8	6547.3	12970	9860.3	9343.5	8417.7
Q86UF2	138	S	12494	7892.3	9482.8	6547.3	12970	9860.3	9343.5	8417.7
A4D2H0	138	S	12494	7892.3	9482.8	6547.3	12970	9860.3	9343.5	8417.7
Q96PC5	745	S	12494	7892.3	9482.8	6547.3	12970	9860.3	9343.5	8417.7
Q8IX94	140	S	3298.2	2218	3012.4	1931	3811.8	2764.6	2654.1	2300.2
P0CG41	140	S	3298.2	2218	3012.4	1931	3811.8	2764.6	2654.1	2300.2
A4FU28	140	S	3298.2	2218	3012.4	1931	3811.8	2764.6	2654.1	2300.2
Q86UF2	140	S	3298.2	2218	3012.4	1931	3811.8	2764.6	2654.1	2300.2
A4D2H0	140	S	3298.2	2218	3012.4	1931	3811.8	2764.6	2654.1	2300.2
Q96PC5	747	S	3298.2	2218	3012.4	1931	3811.8	2764.6	2654.1	2300.2
A5YM69	445	S	815.6	1508.5	757.06	1061.3	983.95	924.46	1714.6	1158.5
A5YM69	450	S	815.6	1508.5	757.06	1061.3	983.95	924.46	1714.6	1158.5
A5YM69	184	S	7799.8	11033	15309	8760.7	6618.4	6260.5	15196	7888.5
A6NC98	1475	S	15662	8460.4	12422	9280.2	14023	12726	10699	10286
A6NC98	436	S	2311.1	2245.7	2749	2358.3	2751.1	4869.6	2824.5	3207.5
A6NDB9	143	S	3186.4	4457.7	3816.8	4164.1	5978	5251.7	4613.4	4633.3
A6NDB9	155	S	19542.3	15678	18692	18561	26153.4	20839	19269.1	16301.6
A6NDB9	420	S	679.17	1601.7	892.74	2638.8	1051	3306.8	821.2	2672.2
A6NDB9	375	S	9832.1	20160	16240	23613	79288	35639	13666	23824
A6NDB9	439	S	10984	12438	15588	13288	42074	20483	9588.7	15982
A6NDB9	660	S	2909.6	4269.8	2950.3	4653.1	9177.3	6369.1	3956.4	4512.7
A6NDB9	189	S	17260	16170	18532	15674	28035	20515	17551	18056
A6NDB9	544	S	4625.2	6241.9	6419	6725.1	18210	10742	5281.2	6494.7
A6NDB9	303	S	1363.8	1698.1	1611.3	2283.1	7828.2	2369.3	1215.2	1855.5
A6NEL2	742	S	7586.6	9796.2	13674	10620	35472	16548	22308	10916
A6NFI3	10	S	5978.5	4028.7	7031.6	2932.8	4153.4	5591.7	4521.3	5851.3
A6NFI3	112	S	20625	16178	35134	16689	25528	24504	23762	16046
A6NGB9	281	S	12493.9	13293.2	15573.9	14639.1	18211.5	22435.4	13542.1	16197.7
A6NGB9	149	S	24877	22141	21399	18885	31327	29304	22058	25570
A8MVU1	321	S	7630.1	2885.9	5568.3	4893.7	5105.3	6380.9	5109.8	4072.8
P14598	345	S	7630.1	2885.9	5568.3	4893.7	5105.3	6380.9	5109.8	4072.8
A6NI72	346	S	7630.1	2885.9	5568.3	4893.7	5105.3	6380.9	5109.8	4072.8
A8MVU1	324	S	8676.6	2876.6	6973.6	3724.1	4311.6	5078.3	4540.7	3177.1
P14598	348	S	8676.6	2876.6	6973.6	3724.1	4311.6	5078.3	4540.7	3177.1
A6NI72	349	S	8676.6	2876.6	6973.6	3724.1	4311.6	5078.3	4540.7	3177.1
A8MVU1	296	S	872.45	776.94	885.09	477.29	959.74	1174.7	636.44	846.04
P14598	320	S	872.45	776.94	885.09	477.29	959.74	1174.7	636.44	846.04
A6NI72	321	S	872.45	776.94	885.09	477.29	959.74	1174.7	636.44	846.04
A6NKF1	402	S	4673.6	5400.7	4807.7	3960.8	4529.1	5556	5616.8	3675.5
A6NKG5	1030	S	8034.2	5709.9	5572.3	5517.9	8864	5718.3	6738	6333.6
A7E2V4	48	S	2314.9	2410.9	1996	1950.8	2173.8	4493.4	3534	2474.6
A7KAX9	856	S	12103	11514	14993	10002	12001	11758	19044	12032
A7KAX9	952	S	9355.7	9950	20282	9811.9	16736	12075	20068	10775
A8CG34	355	S	5025.5	8059.4	4551.9	8049.2	7230.9	11366	11206	12772
Q96HA1	378	S	5025.5	8059.4	4551.9	8049.2	7230.9	11366	11206	12772
A8CG34	358	S	6360.4	9477.9	5176.8	7098.3	7572.5	10579	12052	11057
Q96HA1	381	S	6360.4	9477.9	5176.8	7098.3	7572.5	10579	12052	11057
A8CG34	325	S	4508.6	5331.5	4554.7	5580.1	5002.9	5840.4	5349.9	6512.8
A8CG34	328	S	4508.6	5331.5	4554.7	5580.1	5002.9	5840.4	5349.9	6512.8
C4AMC7	343	S	2980.7	2419.6	8515	6215.9	6251	6746	6061.3	5120.2
Q6VEQ5	345	S	2980.7	2419.6	8515	6215.9	6251	6746	6061.3	5120.2
A8K0Z3	345	S	2980.7	2419.6	8515	6215.9	6251	6746	6061.3	5120.2
A8MWX3	358	S	2980.7	2419.6	8515	6215.9	6251	6746	6061.3	5120.2
A8K855	200	S	9595.4	5389.1	7785.7	6504.8	6800.9	6012.8	8540	6629.7
A8K855	206	S	9595.4	5389.1	7785.7	6504.8	6800.9	6012.8	8540	6629.7
B0I1T2	992	S	10406	4330.6	7499.5	4709.5	8987.7	6394.2	7429.2	7456.8
B1AK76	101	S	29455	4117.4	17846	4065.5	6893.6	4829.3	8564.8	4778.7
B1AK76	103	S	29455	4117.4	17846	4065.5	6893.6	4829.3	8564.8	4778.7
B2RXH2	197	S	35754	36851	9865	7877.6	7244.4	7370.9	7272.6	6696.7
Q9H3R0	198	S	35754	36851	9865	7877.6	7244.4	7370.9	7272.6	6696.7
O94953	197	S	35754	36851	9865	7877.6	7244.4	7370.9	7272.6	6696.7
B3KS81	490	S	2035.1	1660.2	1771.9	1730.2	2064	2245.9	1866.2	2026.9
B3KS81	492	S	2035.1	1660.2	1771.9	1730.2	2064	2245.9	1866.2	2026.9
P0DPB3	117	S	6398.7	7896.8	10084	6985.4	7481.1	10656	10923	8791.8
B3KU38	193	S	6398.7	7896.8	10084	6985.4	7481.1	10656	10923	8791.8
B4DYI2	1123	S	638.92	861.07	757.45	662.3	965.8	886.35	707.19	807.48
P0DKV0	1129	S	638.92	861.07	757.45	662.3	965.8	886.35	707.19	807.48
Q99613	11	S	19793	8631.8	11249	10190	17630	20479	14512	13813
B5ME19	11	S	19793	8631.8	11249	10190	17630	20479	14512	13813
Q99613	18	S	19793	8631.8	11249	10190	17630	20479	14512	13813
B5ME19	18	S	19793	8631.8	11249	10190	17630	20479	14512	13813
Q99613	532	S	5193.2	4742.6	4794.2	4543.4	6151.6	5198	5387.8	4045.2
B5ME19	533	S	5193.2	4742.6	4794.2	4543.4	6151.6	5198	5387.8	4045.2
Q99613	166	S	80127	13317	142190	12040	38625	29233	21692	15675
B5ME19	166	S	80127	13317	142190	12040	38625	29233	21692	15675
Q99613	39	S	46669	120910	39610	128890	81090	50888	174280	73599
B5ME19	39	S	46669	120910	39610	128890	81090	50888	174280	73599
B7ZBB8	166	S	219.36	1025	536.05	712.68	1554.5	1224	1027.4	1423.2
B7ZBB8	84	S	20402	23749	24761	25363	110200	53326	25102	27118
C9J069	109	S	2573	11679	2385.8	9469.6	3621.4	4871.2	10581	6339
O43374	760	S	8094.3	23989	9160.2	21733	9434.1	20917	15189	30436
C9J798	760	S	8094.3	23989	9160.2	21733	9434.1	20917	15189	30436
O43374	588	S	4801.9	9205.5	4251.3	5742.8	3318.1	14593	3720.8	11405
C9J798	588	S	4801.9	9205.5	4251.3	5742.8	3318.1	14593	3720.8	11405
C9JI98	124	S	12099	8404.8	15579	10332	21128	14712	16341	11024
C9JLW8	21	S	21932.9	14363.5	20984.4	14289.9	18066.4	19620.3	18403.4	16636.3
P02533	213	S	13294	10499	13303	10138	15627	15534	18595	11627
P08727	178	S	13294	10499	13303	10138	15627	15534	18595	11627
P02533	13	S	25395	15872	77750	17130	28814	20675	31890	27462
P08779	13	S	25395	15872	77750	17130	28814	20675	31890	27462
P02538	19	S	4226.6	3282	25909	3505.6	4859.9	4698.8	5271.4	4357.5
P48668	19	S	4226.6	3282	25909	3505.6	4859.9	4698.8	5271.4	4357.5
P04259	19	S	4226.6	3282	25909	3505.6	4859.9	4698.8	5271.4	4357.5
P02538	71	S	20918	21087	27680	22807	23475	29908	20834	24570
P48668	71	S	20918	21087	27680	22807	23475	29908	20834	24570
P04259	71	S	20918	21087	27680	22807	23475	29908	20834	24570
P02538	37	S	7854.9	3413.6	15100	3640.3	5192.8	4408.9	4054	4049.1
P02538	60	S	11215	8894.7	75460	8857.7	16856	11982	12145	10703
P48668	60	S	11215	8894.7	75460	8857.7	16856	11982	12145	10703
P04259	60	S	11215	8894.7	75460	8857.7	16856	11982	12145	10703
P02538	41	S	5258.8	5687	8679.9	5439.5	5830.5	6414	6312.4	5960.4
P48668	41	S	5258.8	5687	8679.9	5439.5	5830.5	6414	6312.4	5960.4
P04259	41	S	5258.8	5687	8679.9	5439.5	5830.5	6414	6312.4	5960.4
P02538	44	S	5258.8	5687	8679.9	5439.5	5830.5	6414	6312.4	5960.4
P48668	44	S	5258.8	5687	8679.9	5439.5	5830.5	6414	6312.4	5960.4
P04259	44	S	5258.8	5687	8679.9	5439.5	5830.5	6414	6312.4	5960.4
P02768	82	S	68181	78649	61272	152000	29796	75187	110670	106930
P02768	294	S	3528.5	3104.3	2902.3	3866.4	2528.2	3326.8	3600.8	4109.7
P04264	66	S	6048.3	5059.2	12500	4811.8	8881.6	8196.3	8783.2	7975.5
P05787	274	S	936.13	3659.6	2147.7	3011.3	6226.1	3544.4	2643.8	2945.6
O95678	334	S	936.13	3659.6	2147.7	3011.3	6226.1	3544.4	2643.8	2945.6
P05787	477	S	31588	25490	32808	30288	49747	64437	132190	35325
P05787	253	S	5193.7	10482	13339	13855	30334	26498	13606	10720
P05787	432	S	7613.5	8963.7	9093.9	9626.7	11384	11491	16910	12926
P05787	43	S	1644.2	1219.7	1966.3	1595.8	3808.8	6589	1853.3	5266.2
P05787	44	S	1318.9	2474.8	2098.3	3391.8	5755.7	7494.6	2245.2	4228.8
P05787	291	S	10017	11195	15950	10428	26486	15786	20676	10849
P08727	35	S	8795.3	9029.8	8168.7	8214.7	14073	10716	59206	11120
P08727	149	S	22378	11269	17358	11842	25673	16172	19046	11591
P08727	315	S	24943	11212	20103	10137	20174	13680	18962	10517
P08727	395	S	11428	10266	12530	9598.9	31022	19359	36474	13747
P13646	427	S	150530	114110	381920	117890	147990	402030	136610	142850
P35900	13	S	9513.3	8639.2	9640.4	8829.7	11075	10247	8762.1	9500.3
P35908	62	S	19650	14921	29380	12917	19800	19417	21131	20231
Q04695	32	S	1966.2	671.38	18879	0	3400.2	807.42	4202.2	380.03
Q04695	39	S	18944	10118	29245	11052	18493	13067	33164	10577
Q04695	13	S	28413	19833	70697	18932	37445	36382	91314	23384
P07951	87	S	52048	94742	60899	83656	60576	121890	54339	99968
P09493	87	S	52048	94742	60899	83656	60576	121890	54339	99968
Q86YZ3	1008	S	2063.5	2956	3288.3	1803	3259.5	2252.3	2742.4	2516.8
Q86YZ3	659	S	5465.3	4372.4	5434.4	2834.7	4095.9	6117.9	5387.7	5347.9
Q9C075	64	S	17660	19398	17684	20550	75716	22167	24628	19167
Q9C075	65	S	5704.9	8095.8	6673.7	7524.9	41606	11246	8623	7942.4
E9PAV3	1018	S	2434.2	2155.1	2468.2	2069.1	2222.4	2891.3	2166.1	2686.9
E9PAV3	1135	S	1356.5	1680.3	1594.3	1085.3	1253.8	1974	1267.7	2154.8
G9CGD6	873	S	15355	12736	18135	20874	22559	31583	16554	20943
Q8WWN9	411	S	15355	12736	18135	20874	22559	31583	16554	20943
G9CGD6	891	S	17535	13620	17674	17399	18770	18684	19301	15441
Q8WWN9	429	S	17535	13620	17674	17399	18770	18684	19301	15441
O00116	65	S	12629	8223.7	10349	9127.8	10077	11800	12275	9212.8
O00151	90	S	11599	33798	28584	30143	17310	27174	27650	16826
O00159	408	S	7563.6	8807.1	8051.2	6148	9555.5	8367.9	7655.3	5064.6
O00160	1023	S	4004.6	2040.4	4761.2	2383.9	3240.1	3925.5	3667	2831.1
O00161	20	S	4468.2	3947.1	4367.7	4979	4925.7	5172.9	4888.1	5752.5
O00161	110	S	32951	47760	36335	37998	44579	40017	30033	27443
O00178	44	S	21005	27531	29855	34510	20615	23885	32092	28320
O00178	47	S	48594	123226	54482	121037	60574	55671	139322	67519
O00178	12	S	4377.6	3494.2	3835.3	3430.8	4041.5	4424.8	3833.6	3637.2
O00178	24	S	5543	3176.8	5256.9	3263.2	3675.7	4927	3918.2	3688.1
O00178	25	S	8257.7	7222.4	8306.5	7463	8259.3	8393.4	8809.5	7237.3
O00192	335	S	3302.6	5450.7	3754.8	5519.1	4755.5	6614	3954.1	5567.7
O00193	17	S	45573	49176	62981	65625	79339	62090	65602	53866
O00203	276	S	242670	215680	262680	184790	199940	181360	234780	151320
O00203	750	S	4238.3	9853.4	2981.3	6446.4	9306.9	7318.6	9892.6	8185.3
O00204	348	S	5091.1	2971.5	5438.1	3673.3	8222.8	4905.1	8446.8	3788.1
O00204	318	S	4805.6	7088.1	8139.9	7151	15474	9094.1	14911	7241.5
O00231	14	S	4947.5	5646.1	4019	5911.5	3505	8053.8	7586.6	9128
O00231	23	S	3654.3	2835.1	2247.8	4317.8	3108	3384.5	4461.8	3194.8
O00255	548	S	5631.2	6005.3	3384.9	3269.8	10118	7634.1	3751.4	3348.9
O00255	492	S	18466	9734.9	12629	9694	16772	17398	14217	14214
O00257	415	S	2325	2031.7	3850.4	1889.2	4497.7	3113.2	4085.5	2439.3
O00257	434	S	3925.7	3349.9	3467.4	2583.6	3440.3	4001.2	3710	5120
O00264	181	S	201800	120110	141070	95766	147140	152400	154070	114640
O00264	57	S	203270	114750	137770	105300	184750	153620	143990	125670
O00267	19	S	2162.4	2233.5	1969.8	1273.7	4784.1	1873.7	8323.6	2163.8
O00273	315	S	45426	16396	38149	13105	30068	15464	20269	10408
O00273	28	S	10966	8347.5	7990.3	8247.5	8987.7	8686.1	10149	10177
O00299	156	S	26702	20426	26633	19786	27080	26142	24553	21429
O00303	258	S	10081	3908.9	12191	5750.7	8322	6094.6	10313	6284
O00308	211	S	5488.1	4622.2	7009.2	5336.6	5776.4	7022.5	6521.1	6764.4
O00400	22	S	905.1	1395	1275.2	1759.9	1332	1726.5	1662.7	2032
O00401	484	S	9400.7	17012	10297	12803	14885	14220	13530	14976
O00401	485	S	9400.7	17012	10297	12803	14885	14220	13530	14976
O00409	391	S	1690.8	2792.7	2213.5	3019.9	3278.1	3722.7	3129.5	2989.7
O00409	85	S	20805.5	13971.4	21100.2	16235.8	18749.1	20533.3	19879.7	19098.8
O00409	97	S	8209.5	6517.1	9055.2	7868	7036.1	9366.3	9955.2	9464.4
O00418	445	S	13381	17466	10979	22127	10011	20286	16184	21466
O00418	470	S	40161.4	58795	55572	58200.8	38386.2	44033.3	46732	46402.5
O00418	474	S	16653.6	26808.1	22000.2	24851.3	17380	18547.9	21390.1	19721.6
O00418	477	S	7847.4	11768	10345	9449.8	6910.2	7668.3	10690	8583.5
O00418	18	S	3385.1	5786.5	3426.1	6768.6	3443.5	3711.1	8305.5	5848.7
O00423	110	S	12815	10284	10930	9386.4	10110	12018	8757.4	18500
O00423	113	S	20878	27452	20033	26575	25779	35429	22106	44378
O00429	616	S	102610	58268	153610	55771	90793	87088	139310	76695
O00443	1553	S	9474.6	9211.4	7922.5	6802.4	9724.4	11065	12092	7993.4
O00443	259	S	14930	12329	13736	13472	19581	18906	19350	14427
O00459	262	S	27620	48534	52246	36053	50659	52382	69919	26275
O00459	263	S	7365.3	10267	10258	9368	8886.3	10778	12126	10185
O00461	364	S	8512.1	7414.9	8211.5	7468.3	8160.6	8729.7	10043	6967.2
O00461	538	S	14285	10424	6499	9683.1	7050.2	9209.7	11704	9202.4
O00461	583	S	29733	38908	35981	30287	23368	28494	46888	19555
O00470	196	S	9600.5	27902	15835	29840	15017	27722	19676	35953
O00499	296	S	89773	86642	70583	91805	105615	117603	89833	84801
O00499	298	S	39483	39213.7	32450.2	41186.4	47888.2	58059.7	39073.6	40431.3
O00499	303	S	71474	67193	55503	63887	71761	72491	65629	64578
O00499	331	S	51937	37305	39757	34991	50542	45072	42510	51288
O00505	56	S	19254	16953	18449	18141	13870	20698	19394	17619
O00505	60	S	94952	91847	89790	82586	70286	87231	100586	71006
O00506	231	S	15937	12380	12116	11732	11113	12897	12373	11947
O00512	687	S	3564	4670.4	5569.3	4278.4	5293.8	4195	7697	5386.4
O00512	291	S	6959.8	5806.7	6508.6	5965.8	8170.5	7708.2	7158.2	7304.8
O00512	278	S	14398	15007	25137	13827	20404	18616	21454	14774
O00512	917	S	16697	12346	21032	12522	22410	17319	22601	14905
O00515	272	S	28058	33568	112170	29426	111980	68256	76441	51559
O00515	355	S	7978.3	13658	43257	10794	19823	14055	40682	19459
O00515	356	S	20708	22735	73461	19418	38107	25783	62311	30415
O00515	177	S	49012	65558	185600	75857	283920	79199	146800	65502
O00515	385	S	3358.9	3581.6	5988.1	4058.3	11088	5970.4	6337.2	3869.6
O00515	123	S	40109	85680	315110	59609	357040	139850	168200	120900
O00515	64	S	88302	130260	255610	138040	446940	262930	363140	158590
O00515	38	S	6639.7	8081.2	6162.5	6886.1	10497	10650	28779	6415.1
O00515	49	S	9134.4	13849	24452	16885	25413	22283	19508	19116
O00515	394	S	46166	50334	261090	54281	192790	77470	140680	53059
O00534	202	S	12852	10402	11011	8640.4	15212	11247	14193	10980
O00559	36	S	190110	135500	208460	159230	332740	183560	165850	145650
O00560	6	S	12134	10679	8255.3	8556.3	10355	10124	10699	11102
O00562	300	S	5847.6	5361.5	5821.8	5133.3	6091.1	5737.7	6083	5168.7
O00566	163	S	148506	165218	126596	164643	199422	151365	308740	150526
O00566	167	S	64100	103580	60664	107330	94892	83523	182610	92211
O00566	171	S	148506	165218	126596	164643	199422	151365	308740	150526
O00567	519	S	5263.1	4409.8	4623.3	5161.9	4970	4689.8	6043.5	5271
O00567	520	S	19093.1	22677.8	18124.3	32278.9	19725	20642.8	28155.5	19635
O00567	563	S	21198	33805	19609.2	26010	25616	57317	45580	92214
O00567	569	S	10879	17290	8351.2	13422	10626	24839	19148	47970
O00567	570	S	10879	17290	8351.2	13422	10626	24839	19148	47970
O15523	592	S	7793.4	5833.9	7384	7645	6018.3	5744.5	11262	14464
O00571	594	S	7793.4	5833.9	7384	7645	6018.3	5744.5	11262	14464
O00629	60	S	38623	39989	35483	34291	40760	30167	42457	33806
O00712	312	S	15111	35192	21712	45951	26459	58966	19424	44501
O00712	328	S	12595.5	19458.9	16625.4	21817.7	19856.9	27385.4	12591.9	23015.3
O00712	332	S	3366.6	5372.9	3790.4	5886.7	4492.9	6716.4	4440.4	5485.3
O00712	295	S	27060	26124	25234	27823	23285	29422	25389	31527
O00750	155	S	13261	31054	27671	32049	39860	61660	34028	47365
O00763	35	S	11215	10295	11300	11607	10925	18852	11057	32285
O00763	37	S	6664.6	5481.8	6418.3	6506.1	7136.2	8778.2	6515.3	13673
O14495	297	S	10952	33588	10778	43741	15450	44933	15548	39050
O14495	19	S	6801.4	10715	8724.5	10138	13226	16408	10562	10067
O14497	696	S	26584.4	23420.5	28012.1	24553.2	34330	34166.3	31588	28930.2
O14497	698	S	9869.1	13620	13335	13612	14023	16303	14936	15772
O14497	702	S	4946.8	5416.2	7922.1	6280.2	6008.6	7244.8	6172	6242.7
O14497	772	S	3289.1	2262	2898.5	2658.9	3624.8	3015.8	2821.7	3119.9
O14497	1751	S	44198	44955	53481	40719	52568	56410	46526	45646
O14497	382	S	2090.5	2401.4	2731.3	2527	4365.2	3646.3	3539.6	3146.8
O14497	1600	S	26147	18323	25706	23856	34320	26444	25475	21983
O14497	1604	S	26147	18323	25706	23856	34320	26444	25475	21983
O14497	1755	S	54228	40883	51088	40483	57224	54407	48869	43215
O14514	927	S	2473.3	990.76	1990.1	1473	1708.6	1887.7	1158	1587
O14523	464	S	11702	5747.8	7955.3	6073.8	7481.3	7737.8	7126.4	7007
O14523	470	S	11702	5747.8	7955.3	6073.8	7481.3	7737.8	7126.4	7007
O14545	327	S	10255	12947	9616	11063	14731	10240	15373	10928
O14545	415	S	48393	35400	40765	37697	46038	49018	47211	41573
O14545	470	S	10412	7618.7	10779	9087.4	14025	14124	14619	13535
O14545	480	S	6843.1	6599.8	8479.5	9004.9	17516	9106.4	13280	10994
O14558	16	S	63841	63040	57794	69104	59439	91766	60086	139230
O14558	84	S	1589.8	3406.5	1617.4	2827.6	1671.3	3654.5	1895.7	4211.9
O14562	72	S	52716	33235	38631	28475	36729	34782	34093	29539
O14576	635	S	2216	3290.7	3001.9	3334.8	2896.7	4491.7	3212.1	4315.1
O14576	179	S	8087.5	12742	10069	14214	8048.9	19513	8133.9	20504
O14576	50	S	6269.3	11215	6150.2	11722	6385.1	15441	8615.2	17128
O14578	480	S	7919.1	4286.3	9018	4206.9	8229.5	6767.7	5963.3	5452.6
O14579	13	S	11544	19178	12535	16827	11075	15349	23590	11462
O14579	44	S	16248	10581	19854	18993	13922	16351	17929	15597
O14579	45	S	16248	10581	19854	18993	13922	16351	17929	15597
O14579	99	S	11592	12485	13219	14075	13203	23547	15968	26350
O14610	6	S	0	353.17	144.35	255.85	0	328.79	136.35	460.62
O14617	658	S	4069.8	6472.7	3307.5	7539	3228	12191	10320	12697
O14617	632	S	17163.9	15415.2	15472.9	14631.4	23006.4	16927	17136.3	13982.6
O14617	634	S	5702.9	6337.5	4468.9	5531.2	6194.4	5468	5478.3	4687.9
O14617	827	S	20308	43727	21452	55152	23460	28267	83030	32169
O14617	829	S	22912	28665	18280	39066	22104	20635	60185	23746
O14618	267	S	2405.4	1515.6	2068.8	2201.5	1556.2	3096.2	2093	5038.6
Q5TA81	88	S	1542.5	2600.5	4875.5	2262.4	3170.4	3135.8	4913	3661.6
O14633	88	S	1542.5	2600.5	4875.5	2262.4	3170.4	3135.8	4913	3661.6
O14639	215	S	33145	24191	25365	23566	27893	28360	28211	25526
O14639	216	S	7699.8	8412.1	5754.6	7741.7	7980.1	9023.1	7642	6875.9
O14639	706	S	38064	30789	32407	34215	39420	36442	39807	33520
O14639	367	S	18320	17395	12375	16548	20142	16426	19340	16823
O14639	422	S	2373.6	3101.6	2674.6	5502.8	2152.3	3297.3	3112.3	4004.2
O14639	540	S	3109.2	4688	1988.4	8455.9	4294.5	4832.2	2401.4	8003.9
O14639	586	S	14252	15741	15277	18477	13795	22248	15170	20956
O14639	587	S	31610	32066	31989	39873	34520	43976	28910	42904
O14639	655	S	18226	13906	14116	15226	17745	15009	15050	12659
O14639	431	S	10652	13567	7335.5	19711	8040.2	9892.3	9714.4	9769.4
O14639	435	S	8752.1	13988	7575.4	21641	7741	11265	9200.5	13126
O14639	352	S	3157.4	3702.3	1693.9	5755.7	4561	4118.5	2221	3837
O14646	1677	S	6183.4	2800.7	2898.4	3058.6	2803.8	3693.2	3436.3	3853
O14646	1098	S	4966.2	1788	7228.1	1885.4	2493.9	2272.5	3990.8	1636.2
O14646	1102	S	4966.2	1788	7228.1	1885.4	2493.9	2272.5	3990.8	1636.2
O14647	207	S	1073.6	2607.6	1088.8	3661.6	1837.3	1781.3	5746.5	1453.7
O14647	208	S	1073.6	2607.6	1088.8	3661.6	1837.3	1781.3	5746.5	1453.7
O14647	1807	S	10674	4999	8021	4475.8	5951.6	10846	6776.1	8111.2
O14647	1560	S	10946	18858	14670	16601	21459	25240	19530	10717
O14681	326	S	4930.2	5907	5827.9	5150.6	6158.1	7930.6	9231.4	7138.1
O14681	330	S	26321.5	26930.6	27838.8	24494.9	30712.4	34092.3	37375.2	27095.4
O14681	320	S	9483.4	13642.3	10618.5	11221.2	16006.8	15880.8	14411	13990.3
O14683	14	S	9520	19652	8399.5	18797	13926	25038	10804	22263
O14686	4738	S	92036	49467	134880	47414	104600	69489	65944	52632
O14686	2274	S	5986.6	7155.5	6590.5	7419.4	4911.9	7115.4	7104.9	8128.5
O14686	373	S	9001.5	7778.8	13494	7689.3	9938.4	7942.4	8788.6	7295.7
O14686	3130	S	7985.4	6998.8	12647	8230.6	11642	9369.1	9413.7	8408
O14686	654	S	12953	19735	15216	17761	21264	25170	17921	24123
O14686	468	S	2605.3	3236	2358.9	3574	2497.3	2345.2	4900.8	2604.6
O14686	477	S	2605.3	3236	2358.9	3574	2497.3	2345.2	4900.8	2604.6
O14686	1606	S	6437.6	4678.5	5357.1	5950.4	5507.1	6112.9	6372.8	5640.8
O14686	4359	S	5424.3	3895.3	7407.7	3902.2	6867.9	4786	5415.6	4241
O14686	1180	S	1510.2	1025.3	2839.1	1598.7	2610.2	2138.7	1974.8	1569.8
O14686	4325	S	13228	8727.1	14527	9304.2	17460	12504	10025	12111
O14737	119	S	36952	15995	35748	18332	22051	16616	33975	17682
O14745	280	S	11908	19658	13877	14746	21557	21149	23545	18447
O14745	269	S	19448	23378	18993	21224	46769	43741	25768	22758
O14745	162	S	1804.7	1284.4	1628.6	1309.8	3239.9	2436.7	1539	1565.3
O14745	290	S	131557	132689	134316	144017	284056	185616	166431	143192
O14745	291	S	38553.4	38471.4	38777	38162.3	64464.9	48534.9	43406.3	44851.8
O14745	294	S	4354.1	5876.9	4801.4	5815.6	12108.6	8079.7	6448.4	6182.9
O14791	311	S	42479	48051	45531	91862	40916	66799	66846	68481
O14791	314	S	29201.5	32149.3	32573	58691	28281.7	41903	44454	44175
O14795	176	S	17528	19360	17386	20964	17621	22902	17617	17536
O14827	718	S	10370	11068	11243	9591.3	9622.2	8263.2	12233	8630.2
O14827	726	S	4472.9	12651	6341.7	14164	5584.7	7876.5	11846	10923
O14827	727	S	4472.9	12651	6341.7	14164	5584.7	7876.5	11846	10923
O14827	746	S	5414.3	9497.3	6165.9	8779.2	5143.4	6542.8	8518.2	7218.3
O14827	633	S	14389	27730	18904	17989	13626	15623	17792	13989
O14828	76	S	98763	52465	75969	45222	100300	71772	64550	50616
O14829	84	S	5012.9	339.8	5398.7	307.34	1607	1054.4	451.56	527.07
O14829	87	S	5012.9	339.8	5398.7	307.34	1607	1054.4	451.56	527.07
O14867	196	S	13907	10223	10270	8008.1	12894	11036	16287	9850.3
O14874	31	S	13042	9028.2	11087	7838.3	16074	10283	9846	9769.1
O14879	478	S	3789.6	3450.5	3540.4	3268.2	4349.1	4501.8	4166.4	4465.9
O14879	203	S	6458.3	3398.7	6609.1	3350.7	6618.2	4179	8553.1	3477.6
O14896	47	S	3766.2	2425.1	22519	2129.2	6474.9	2298.8	4932.4	2034
O14908	232	S	2157.4	2551.4	3252.7	2539.3	3124.7	2701.8	4681.4	2686.1
O14920	672	S	4936.1	3830.3	4448	3657.5	5049.3	4438.8	4069.5	3474
O14924	850	S	4349	4677.1	5313.5	3794.3	4831.3	4538.9	4324.5	4442.2
O14924	661	S	3737.6	2922.9	2759.4	2457.6	3141.2	3052.3	2949.4	2664.8
O14924	172	S	5893.8	5880.1	7230.8	6388.7	6349.5	6626.5	8163.1	6591.9
O14929	361	S	13601	1382.9	10699	1248.7	5688.5	1785.7	5827.6	1197.2
O14936	582	S	1394.2	2375.3	4680	2183.7	5298.2	3360.5	4711	1225.9
O14944	161	S	15264	9243.3	10127	9168.3	10661	10612	10413	9665.4
O14974	299	S	82326	89877	80562	91954	79299	145740	80242	130390
O14974	422	S	22708	26923	16295	19199	18460	26688	26685	19345
O14974	445	S	215820	163890	121420	143420	183020	161400	215150	254310
O14974	507	S	15404	8518.9	10985	8232.5	14297	11144	16785	16435
O14974	995	S	2675.1	1730.5	1849	1229	1991	1981	1827.8	2160.1
O14974	871	S	57545	28981	29259	50526	28262	27206	52615	35234
O14976	826	S	8970.4	10389	9471.9	10189	9435.7	11776	10730	12476
O14976	829	S	51145.4	47780	46587.9	44447	57567.7	48909	63763	45863
O14976	73	S	23089	19771	19680	18643	41046	31151	26133	28752
O14979	241	S	25211	15543	29536	16544	26242	18964	24673	17375
O14980	395	S	23282	28497	20091	24246	28380	30029	28305	29512
O14980	1055	S	13383	15529	13546	15977	13466	14998	19488	16612
O14981	234	S	42231	20253	28727	18652	34777	28847	37154	24121
O14981	237	S	23898	10201	14199	9759.2	17507	13535	19450	10771
O15013	379	S	5214.6	5518.2	5110.7	5642.6	5392.4	6887	7606.6	10256
O15013	59	S	9025.6	10018	10461	8192.2	6640.2	10001	10202	8445
O15014	1055	S	94530	63354	80241	56430	85022	70112	87321	68571
O15014	358	S	29351	23406	44381	22467	36465	29182	32949	26788
O15014	576	S	4406.8	5794.4	5951.6	5997.4	9140.3	6027.6	6000.7	6498.1
O15014	379	S	11982	7152.2	15164	8643.7	11304	9804.3	14202	9433.1
O15014	491	S	27815	19462	31186	18409	28308	23668	26449	20883
O15014	413	S	5859	6023.4	7411.4	6880.9	8467.9	6960.6	9678.8	7097.7
O15014	842	S	11895	7703	13416	8283	12967	10684	10135	8845.9
O15021	1860	S	7115.9	7646.5	11558	7615.1	8465.6	9136	9762.7	9890.5
O15021	137	S	2610	7642.1	4844.5	8130.7	7019.2	9462.8	7955.4	9857.2
O15021	1467	S	5812.3	4975	6076	7927.2	6180.3	6807.4	6971.8	7196.7
O15021	1523	S	3207	2923	5709.6	4602	3934	4626.5	4288.4	5441.2
O15021	1438	S	6184.6	7542.5	7048.8	7758	8562.3	9664.8	9208	11990
Q9Y2H9	1258	S	6184.6	7542.5	7048.8	7758	8562.3	9664.8	9208	11990
Q6P0Q8	1399	S	6184.6	7542.5	7048.8	7758	8562.3	9664.8	9208	11990
O15021	1391	S	8235.1	8680.6	11990	10197	7353.6	14265	9218.5	12502
O15021	1779	S	15519	15747	44816	13213	23631	21095	18211	17367
O15027	2081	S	12906	9182.8	11281	7516.1	10337	7112.5	11635	5695.1
O15027	2083	S	46930	31242.8	39715	25719.1	37058	30528.5	42454	25285.1
O15027	1069	S	8130.9	6336.7	6826.6	5908.8	6479.9	6590.7	10064	11803
O15027	1327	S	13505	14239	13673	15171	15714	14852	17856	13304
O15027	592	S	11367	9148.6	17365	11159	16059	11609	15821	11608
O15027	595	S	29854	22940.7	40859	26263.9	41047	29984	36401	30828
O15027	314	S	5716.2	3978.8	7548	3664	7801.4	5279.1	5473.4	3839.2
O15027	1964	S	21754	22871	24494	19540	25609	27563	27726	26085
O15027	1939	S	7514.1	5653.2	8308.2	4990.8	7157.7	7436.6	6234.4	6552.7
O15027	568	S	9798.7	8740.4	11815	7834.1	11173	8211.9	12301	9626.6
O15027	1356	S	18037	13946	15083	13290	14838	13286	17723	14382
O15027	1365	S	18037	13946	15083	13290	14838	13286	17723	14382
O15027	73	S	2494.3	1717.3	2294	1902.3	2509.7	2812.5	2283.7	2182
O15027	74	S	2494.3	1717.3	2294	1902.3	2509.7	2812.5	2283.7	2182
O15027	1223	S	11607	10476	7569	8988.4	12049	8873.1	13169	9922.8
O15033	337	S	6283.1	6323.1	9697.2	6327.4	8510.2	6827.8	7524.2	5206.5
O15037	353	S	10707	5871.1	10175	5794.8	10153	6228.9	9894.6	5855.5
O15037	359	S	10707	5871.1	10175	5794.8	10153	6228.9	9894.6	5855.5
O15037	10	S	14378	13134	14493	12491	19003	15364	17376	11499
O15042	67	S	19505	14777	19454	17487	26338	24075	25609	20212
O15042	485	S	8306.7	2863.5	8611.6	2447.9	4773.5	3227.1	3813	2997.4
O15047	1153	S	9227.1	7736.1	10803	7102.4	9250.9	10277	9845.4	6895.6
O15047	915	S	3894.4	4570.3	4137.2	3874.5	3500.1	5758.5	4350.1	4270.8
O15047	1103	S	21223	19319	27722	20521	23412	26775	23482	20443
O15055	977	S	3433	4307.9	7272	3141.7	5220	4343.2	6958.7	4349.7
O15056	1122	S	29859	19141	26876	18467	34094	23621	28253	19525
O15061	584	S	9461.7	8812.8	8890	8722.3	7558.5	14289	8368.7	38641
O15061	384	S	9354	8303.1	6573.8	9162.7	7463.3	13913	9752.4	32673
O15061	936	S	8693.8	6870.3	7533.6	6282.3	5993.1	10324	7353.3	15693
O15061	653	S	19343	33079	18865	35457	17480	66671	14042	124520
O15061	824	S	6227.7	5958.5	5661	5808.9	8281.2	7162.4	7008	10612.5
O15061	1044	S	41283	28896	33880	33679	30313	54993	35711	96420
O15061	1049	S	48744	45750	39257	56320	34606	111391	38633	239356
O15061	913	S	1424.4	1398.4	1189	1168.9	1307.5	2406.9	988.13	4294.7
O15061	429	S	32097	74158	33195	73797	32443	144030	24421	468050
O15061	777	S	8644.1	20405	6017	14953	10660	53640	7651.2	66433
O15063	945	S	17935	21130	25026	19332	24726	24107	28360	20346
O15063	946	S	17935	21130	25026	19332	24726	24107	28360	20346
O15068	965	S	20425.3	14856	18274.9	13313.5	18426.2	17473.4	18096.9	16153.5
O15068	620	S	9403	12139	10914	9786.5	12338	15733	8758.1	13386
O15068	589	S	3398.3	9601.2	4337.3	7219.1	6466.3	9318.7	7247.8	12420
O15075	720	S	10990	10622	12480	9726.1	15017	12483	13046	10710
O15075	726	S	5770.5	5838.7	6373.1	5410.1	6671.5	7178.3	8241.2	7041.1
O15075	330	S	26601	31123	28907	35489	27501	36025	35854	34794
O15075	332	S	8124.7	6679.7	7308.1	8757.2	8531.2	11968	22718	15104
O15075	337	S	26601	31123	28907	35489	27501	36025	35854	34794
O15075	307	S	18497	30432	20737	38730	20955	42617	24830	60328
O15075	352	S	677.13	2109.6	571.36	1830.1	927.42	1421.4	3931.7	2690.6
O15075	353	S	745.15	2028.8	909.71	1959.7	1032.5	1785.5	3639.4	2748.4
O15075	363	S	1880	2216.3	1797	1844	1421.3	2065.5	2233.2	2026.3
O15075	364	S	4868.8	5395.6	5086.5	6613.1	4743.1	7289.1	6048.7	7232.8
O15085	150	S	6250.9	6612.4	6733.2	6828.5	7892.3	8483.4	5603.7	7469.6
O15085	589	S	3608.7	4648.7	3296.6	3747.6	4591.8	4936.9	4042	4317.2
O15085	592	S	3608.7	4648.7	3296.6	3747.6	4591.8	4936.9	4042	4317.2
O15085	35	S	12915	15132	13009	15608	13895	19394	16072	19368
O15085	663	S	13477	13020	15804	11523	16506	14678	15463	11970
O15085	1458	S	14602	15330	13706	13959	11570	12518	21334	13375
O15085	1413	S	592.63	495.6	4159.5	2639.1	6940.6	3871.2	763.45	884.84
O15085	635	S	4758.6	4500.4	5078.9	5476.2	6248.4	5882.1	6936.9	5019.9
O15117	558	S	17251	11621	16134	14562	27809	21430	13746	13503
O15117	209	S	40438	35101	43163	47211	51426	55393	48135	38432
O15119	371	S	6546.9	5068.9	7623.1	5332.4	7081.3	6170.9	7556.3	6821.7
O15119	375	S	6546.9	5068.9	7623.1	5332.4	7081.3	6170.9	7556.3	6821.7
O15119	707	S	4292.6	4182.3	3899	3690	4139.3	4838.6	5222.5	4539.7
O15127	319	S	29376	29241	28078	26963	28190	38664	30003	36823
O15143	310	S	10330	15195	13063	15232	9765.1	12618	11294	10109
O15151	342	S	10484	8067.1	9672.3	8902.5	10956	10858	9622.9	9738.6
O15155	50	S	4630.1	10536	6442.8	8082.2	5591.3	6899.1	7130.2	6906
O15156	180	S	7107.5	6266.9	6313.5	6075.3	5825	6570	7064	7197.7
O15164	1028	S	6711.7	5946	5519.1	4492.2	28112	6381.1	26915	6478.4
O15164	811	S	18369	13566	18661	14350	22368	18117	21038	15143
O15169	77	S	7314.1	6049.1	8956.9	6132.1	7490.5	7218.9	7089.5	5820.3
O15169	217	S	6126	3892.4	6700.7	3660.3	5607.6	3666.8	6344	3582.4
O15173	104	S	64821	13753	22837	11232	29695	14172	16317	11878
O15173	90	S	5367.3	3850.7	3839.5	3211.8	6613.6	5315	4001.8	3743.6
O15173	208	S	83480.9	58205.3	70004.4	53006.2	85675.9	72493.6	50600.6	50633
O15194	268	S	1037	891.1	694.88	779.8	790.01	1286.1	1101.9	1206.9
O15195	773	S	26748	37215	32360	42639	95326	67497	37655	44418
O15211	409	S	3065.9	5590.8	3102.6	4499.1	3861.2	5758.5	6302.3	4665.3
O15211	619	S	7162.7	6793.6	8350.8	6674.9	7887.3	8982.1	8632.4	9491.3
O15231	465	S	24547	17879	20721	19088	26623	17442	61465	23153
O15231	512	S	8908.4	7308.3	14597	7424.6	13236	9505.4	23022	9039.2
O15231	519	S	17459.6	12158.5	18812.3	12318.8	16117.3	15575.5	28935.7	12879.8
O15231	152	S	12768	22309	13312	30065	29236	19659	85031	23817
O15231	153	S	4623.9	4921.1	4024.5	6818.3	3962.9	5103.7	8622	5032.6
O15234	28	S	2426.3	2143.3	2016.7	2274	2560.6	3024.8	2532.7	3410.9
O15234	148	S	37099	31210	40223	31972	43673	28271	49492	26267
O15247	138	S	12719	10284	7677.9	11445	11689	13164	8607	10883
O15247	103	S	23425	26926	19024	21022	19975	36613	19914	25645
O15258	2	S	19662	14134	20474	10573	23819	17038	16269	12753
O15258	95	S	66559	39092	63212	34452	77021	46877	50905	33405
O15294	20	S	2166.8	2019.3	2439.7	2100	2416.9	2498.7	2682.7	2486.4
O15344	96	S	14252	21416	15256	21453	14075	17318	20219	15984
O15355	527	S	47631	52996	44950	52014	51204	53220	76173	46745
O15355	183	S	4412.5	4349.7	5680.4	4854.8	5973.5	5948.3	5635.9	5988.1
O15357	132	S	25741	24372	22738	19785	23722	26758	22286	18208
O15372	183	S	77390	32539	65169	27124	63465	33056	49105	27955
O15379	424	S	76662	71408	65177	75858	51246	48114	79093	56791
O15400	125	S	3111.3	4609.6	3373.4	5206.8	2187.8	4885.3	3100.2	6415
O15400	129	S	25146.3	55889.6	34395.4	50699.8	26571.8	46923.3	31034.2	41113
O15400	131	S	2464.3	2540.2	2183.7	2241.7	3739.6	3436.5	3262.9	2349
O15417	999	S	27692	25613.7	36262	22814.8	35376	32494	33585	29760
O15417	991	S	17449	16214	21805	14714	20343	19177	20877	18824
O15417	995	S	17449	16214	21805	14714	20343	19177	20877	18824
O15417	1127	S	20514.5	20994.4	41874.2	20545.9	25438.7	24968.9	48865	21434.1
O15417	1136	S	25046.4	21093.3	47189.2	21369.4	32773.5	28067.8	51656.4	22788.5
O15417	1359	S	2807	2286.6	2663.4	2157.6	2217	2543.8	2555.3	2232.8
O15427	464	S	14306	10095	10009	11418	7288.1	9538.1	11861	9911.2
O15427	436	S	24056	11153	13699	11091	13204	13692	14122	14256
O15431	105	S	8417.8	9240.2	6344.9	11012	5411.1	8831.7	13571	16394
O15438	281	S	17661	20690	18031	23828	25642	31608	16549	28410
O15438	908	S	24123.6	32265.8	21814.9	38044.2	30711.5	39288.4	24303.5	36976.8
O15438	911	S	46579.6	58335.8	45883.9	72959.2	47905.5	61334.4	47910.5	72096.8
O15438	912	S	15033	16727.8	15405.2	20398.2	16980.6	23851.7	13769.9	22311.8
O15439	668	S	7721.3	5634.4	7578.7	4889.6	7847.2	7633.4	5336.2	7141
O15446	27	S	54587	17190	51738	19103	28446	22753	32058	16261
O15446	128	S	7032.4	5837.5	7067.2	5292.6	6673.4	6498.3	6412.4	5866.8
O15446	136	S	5860.2	4299.6	7128.8	5280.5	5645	5966.4	7098.6	6376.3
O15511	77	S	13416	9158.6	13411	8249.3	9945.5	10670	10484	8818.7
Q6A1A2	214	S	330850	238010	289150	210220	352730	292860	293800	228100
O15530	241	S	330850	238010	289150	210220	352730	292860	293800	228100
O15534	592	S	2314.9	2734.2	2543.7	2147.1	3168.3	3055.8	2542	2936.5
O15534	704	S	19972	18341	21260	18690	16683	20302	22401	18488
O15551	203	S	2103.9	2958.3	3501.4	2873.2	6018.4	3726.7	2291.3	2177.2
O15551	209	S	5717.9	6228.1	8652.9	8080.4	12888	12304	6764.6	8115.6
O15551	199	S	1251	4614.5	4192.6	5116.5	5403.5	7730.5	2313.7	3708.2
O43149	2443	S	22450	23389	22610	17810	26885	24223	21972	19552
O43149	2444	S	19846	18446	17575	13929	21092	18441	18325	14560
O43149	1537	S	1622.8	3740.4	1561.1	3695.2	1924	5277	2494.8	5615.9
O43149	1540	S	1622.8	3740.4	1561.1	3695.2	1924	5277	2494.8	5615.9
O43149	1518	S	16295.1	15288.4	14491.8	14793.9	15333.8	18315.3	15839.9	16137.1
O43150	701	S	112540	97709	127720	91533	121980	116920	187110	94388
O43150	820	S	15432	14420	21432	14885	24949	20177	20142	18525
O43150	822	S	295.75	645.89	434.66	501.84	389.41	742.55	749.43	428.46
O43151	1581	S	19703	10058	32233	8646.5	18908	24246	11272	15864
O43151	1588	S	19703	10058	32233	8646.5	18908	24246	11272	15864
O43151	1589	S	19703	10058	32233	8646.5	18908	24246	11272	15864
O43159	104	S	7693.5	5938.1	8312.2	5385.8	7483.6	5460.9	9069.7	5351.3
O43159	106	S	7693.5	5938.1	8312.2	5385.8	7483.6	5460.9	9069.7	5351.3
O43164	80	S	11269	7482.7	6965.9	7816.5	7097	8273.9	10785	9097.7
O43164	308	S	18361	9570	13634	10660	15049	14314	16112	11673
O43164	309	S	18361	9570	13634	10660	15049	14314	16112	11673
O43164	253	S	10589	9185.4	8493.6	10700	10912	10870	12386	11823
O43166	208	S	7899.2	7691.4	7069	7645.7	7210.3	6097.5	9948	5967.2
O43166	1565	S	8905.2	13869	9301.7	10445	10143	13245	13078	10581
O43166	311	S	22930	22927	27237	20941	23085	18456	26309	13933
O43166	1117	S	9263.3	8918.9	9344.5	8369.4	9727.3	10046	14735	10696
O43166	288	S	41289	33705	49537	31590	49608	44852	53888	33071
O43166	1442	S	59249	34289	40031	40221	62013	36768	64645	31883
O43166	1443	S	59249	34289	40031	40221	62013	36768	64645	31883
O43166	1585	S	15922	16903	10554	15655	21954	17563	24731	10342
O43166	1255	S	5888	6650.6	6182.7	5962.1	10641	9026.5	8438.3	7628.1
O43169	23	S	25138	26110	34251	22470	22933	24721	26626	20651
O43182	37	S	16013	13558	18341	13226	16040	15498	15751	14146
O43189	307	S	24794	10893	30554	7211.8	16344	16066	11716	10293
O43189	311	S	24794	10893	30554	7211.8	16344	16066	11716	10293
O43194	256	S	3815.6	2540.1	3145.1	3044.9	2426.1	3669.2	5995.1	2446.9
O43236	325	S	104300	311800	142300	326570	199430	311780	131370	230720
O43237	194	S	113210	76267	109420	68111	103990	83434	121110	71291
O43237	407	S	7122.8	4962.9	7126.1	5832.2	6039.1	6158.3	5930.7	6026.6
O43246	422	S	3925.8	4342.3	4362	4053.9	5227.2	7810.9	4531.1	5592.8
O43246	427	S	3925.8	4342.3	4362	4053.9	5227.2	7810.9	4531.1	5592.8
O43281	298	S	2581.9	5081.8	3388.7	3672.1	2138.2	3516	3761	4117
O43290	448	S	46022	31264	42405	29080	46023	53509	48576	51162
O43294	418	S	1455.5	7535.1	2321.6	7232	1540.9	5447.6	1806.2	3806.7
O43294	137	S	124975	249202	142665	208265	144502	341573	129875	268187
O43294	140	S	31533	61507	43073	52170	37592	90908	34301	71387
O43294	141	S	48333	159743	69240	115367	55482	196290	57975	137382
O43294	143	S	22929	83869	33063	64066	30153	111564	24049	79061
O43294	68	S	85770	172910	102150	138820	78518	251880	95901	184770
O43294	403	S	2069.1	6720.7	2299.7	6156.5	2583.8	8854.7	3671.3	7229
O43294	187	S	2344.3	5232	2416.5	4728.9	2295.4	4661.9	2348	5600.8
O43294	192	S	14705.3	43800	21065.5	39479.9	15850.4	50369.9	17776	53646.8
O43294	194	S	65975	110603	79684	95648	65947	104704	74264	115016
O43301	23	S	12894	10460	6926.1	9925.6	6731.4	14477	7173.9	10129
O43306	54	S	8517.1	13436	9681.3	12172	11325	15696	11246	13763
O43309	200	S	21311	13414	27779	11332	20130	16465	19567	12105
O43310	299	S	21273	20980	23307	19755	25950	28923	26925	22067
O43314	38	S	42840	32588	32348	31938	35095	31461	33810	29204
O43314	492	S	76015	51449	62550	47332	64600	56953	51813	42573
O43314	493	S	76015	51449	62550	47332	64600	56953	51813	42573
O43318	367	S	8601.2	8072.9	10421	8451.8	9600.6	13324	11983	12836
O43318	389	S	5158.8	4336.5	4773	4890.5	4987.6	5918.4	4959.5	5858.8
O43318	439	S	17688	14192	15189	12510	15098	18042	15958	17949
Q8N7Q3	104	S	21963	20523	23886	15936	29622	22104	17857	19354
P0DKX0	136	S	21963	20523	23886	15936	29622	22104	17857	19354
O43345	136	S	21963	20523	23886	15936	29622	22104	17857	19354
O43353	176	S	33635	19591	26867	19635	46531	33610	27751	20506
O43353	363	S	10608	3801.3	4411.2	4346.2	14151	6863.9	5559.1	4587.8
O43353	531	S	89224	55913	59135	60631	114460	113850	69607	101500
O43379	1123	S	8635	3720.6	7587.6	3633	6004.4	4839.3	12081	4606
O43395	619	S	150750	81505	158660	75256	137300	119810	127750	82155
O43396	113	S	10565	13391	9892.9	11700	9883.9	14025	11678	12955
O43399	19	S	4997	6397	5009.3	6013.1	5095.9	5692.5	6508.8	5990.6
O43399	21	S	11804	9882.9	9314	8271.1	10981	10853	13352	9392.7
O43399	12	S	91197	70319	95976	60183	80163	78130	80103	70127
O43399	166	S	142430	93168	135770	113180	145940	129350	137250	112280
O43399	96	S	5043.3	7961.6	4368.5	6089.7	5764.2	7001.1	6366	5322.9
O43422	141	S	9527.1	6971.5	10678	6288.8	7042.9	7249.5	9654.6	6313.3
O43426	1345	S	12120	10416	12477	9048.8	13087	11839	12612	9423.9
O43426	1392	S	25852	21141	20684	23732	23353	23096	28302	26247
O43426	1084	S	4905.5	4493.5	4450.8	3856.4	4035.3	6215	4758.2	5867
O43426	1049	S	4878.3	4572.9	4482.4	4622	4400.1	5949.5	4784.4	4299.9
O43426	1053	S	17514.3	15714.9	15874.4	14972	17040.1	20615.5	17292.4	15013.9
O43432	305	S	3738.4	3042.9	4369.2	3373.4	4636.3	5120.6	4158.3	3356.4
O43432	1156	S	11556	9099	7630.3	10365	8016.4	10284	10112	10179
O43432	1409	S	18753	14874	20257	11436	17968	12109	16215	9530.4
O43432	240	S	32593	24742	31930	23431	26785	28946	31555	30606
P48506	70	S	32593	24742	31930	23431	26785	28946	31555	30606
O43432	495	S	7400.2	3818.6	5434	3358	6549.4	3960.9	5784.1	3882.4
O43439	264	S	3545.8	3998.4	4580.9	3471.7	5207.7	4931.4	4997.6	4523.1
O43490	275	S	15219	13844	7965.5	7564.3	6791.5	5285.6	7946.7	6810.6
O43491	715	S	14463	15440	10016	12312	11928	16865	11632	14710
O43491	718	S	7106	6213.4	3677.1	5373.9	3997.9	6410	3503.1	5430.4
O43491	38	S	17129	12608	11239	13427	13804	19975	12418	15458
O43491	39	S	36038	27637	24798	26854	31361	35961	28773	30436
O43491	58	S	3866.3	5213.9	3493.3	6659	5195	6895.9	7395.8	9745.4
O43491	598	S	8855	18378	6976.6	26631	10213	20149	8017.9	19459
O43491	386	S	10998	10744	9247.4	10166	10847	10953	10751	12732
O43491	828	S	2948.4	2969.6	2872.3	2876.3	3705.1	4478.7	3308.1	5478.7
O43491	682	S	25504	83605	22830	93451	47253	45197	47671	96049
O43491	683	S	8182.7	30651	10998	37718	10489	19659	18232	41672
O43491	499	S	8665.9	12718	7660.2	11176	11083	9749.8	6679.8	11955
O43491	87	S	29540	58292	16539	96565	27162	85113	30936	193320
O43491	402	S	1926.7	1445.8	1254.3	1613.3	1608.1	1696.1	1361	2118.2
O43493	224	S	21301	13639	12970	11499	9232.6	9646.5	17471	8043.5
O43493	70	S	10153	17027	11011	12323	7876.2	13270	11608	12991
O43493	71	S	71963	117060	64959	90048	65688	87546	72599	78409
O43493	298	S	154876	181769	150626	156208	115882	143109	164969	131972
O43513	194	S	16223	9134.2	15866	8655.7	12676	13831	12722	10874
O43516	276	S	8421.3	6497.5	8555	8438.7	8758.8	13267	7704.9	15553
O43516	340	S	2118.2	1347.8	2084.2	1812	1995.1	2485	2379.9	2324.7
O43521	86	S	12048	8594.3	13852	9970.5	10093	11560	15342	11051
O43521	87	S	12048	8594.3	13852	9970.5	10093	11560	15342	11051
O43524	7	S	2254.5	2562.3	2275.3	2649.8	1999.1	3145	2181.6	2917.4
O43561	224	S	9997.5	10044	6343.7	15038	9341.7	15165	7651.9	15387
O43561	40	S	17226	14383	11381	15333	11313	16258	12577	17042
O43566	478	S	10801	6577.2	10137	9719.6	10124	10444	9775.5	10596
O43566	288	S	50960	33552	53505	41011	47868	58230	49667	54106
O43572	281	S	14792	5745.9	9295.5	5931.2	9162.8	6684.5	10733	5666.5
O43572	187	S	6419.1	9060.6	7094.9	9175	6789.8	8210.7	8428.3	8045.8
O43583	73	S	135610	69114	81641	60946	93539	62753	95822	58365
O43586	318	S	2095	2248	2531.5	2745	3537	2968.7	2563.9	2884.5
O43598	128	S	5728.7	7531	8756.1	7950	11368	10120	7453.8	8531
O43598	169	S	18257	11561	13573	11196	13331	12270	10051	11951
O43639	90	S	34034	34320	53097	33436	47665	40085	41685	36228
O43681	88	S	35135	7319.4	31083	6898.2	21700	10672	21829	8200.5
O43684	211	S	12837	8153.9	8350	7089.5	10584	8941.6	10756	7483.8
O43707	159	S	23802	48916	29818	33588	22713	44066	35455	24305
P12814	140	S	23802	48916	29818	33588	22713	44066	35455	24305
P35609	147	S	23802	48916	29818	33588	22713	44066	35455	24305
Q08043	154	S	23802	48916	29818	33588	22713	44066	35455	24305
O43707	507	S	7580.9	6554.5	6165.5	5744.7	6413.9	6866.4	5813	6308.2
O43707	909	S	4626.1	3644.9	3411.5	2837.2	3377.6	3877.4	3662.9	2889.3
O43719	624	S	68961	123454	78302	117562	195916	104434	191584	103122
O43719	529	S	27570	14759	17733	12264	44044	24704	26763	15403
O43719	452	S	47352	47852	39662	52157	84575	57648	73308	47766
O43719	453	S	116020	117610	92651	127690	215450	142810	183640	110740
O43719	481	S	52184	30251	34185	38523	35665	31867	66813	34328
O43719	721	S	8876.8	16732	6297.7	11740	14551	8332.5	18413	9986.5
O43719	713	S	4137.7	5465.7	3247.6	6022.1	7969.7	4869.9	9611	4372
O43719	714	S	4137.7	5465.7	3247.6	6022.1	7969.7	4869.9	9611	4372
O43719	702	S	5955.1	22065	7076.4	21555	20728	10098	28429	12812
O43719	676	S	53662	112510	41797	123580	73420	50261	169340	78491
O43719	642	S	55062	247160	65262	258580	207120	111290	325680	164890
O43719	616	S	39188	85062	50814	85127	102470	65458	135850	68797
O43741	184	S	33140	59515	49844	47734	55231	56140	32805	35722
O43741	108	S	34734	56663	33530	42547	37912	53973	29164	37104
O43741	158	S	32958	11226	12952	6918.4	21189	8945	12570	7771.3
O43752	2	S	6582.9	4040.6	4812	4455.3	5093.4	5270.1	5228.1	3841.7
O43765	77	S	40168.5	31863.9	42844.3	34077	28251.7	36565.5	42661	30514.1
O43768	109	S	11602	12247	13131	13650	12622	35451	10529	48009
O43768	2	S	10755	6615.9	8345.3	5190.9	7003.1	10124	8945.9	9911
O43791	6	S	24741	12971	16834	12542	18562	15314	17057	13548
O43815	373	S	5734.9	4346.8	4798.2	3810.5	4277.1	4852.9	4785.2	4348.4
O43815	245	S	21596	28863	18239	31994	16666	18841	29385	27485
O43818	50	S	10147	6902.1	8718.8	7044	7704.8	9513.7	10986	7862.9
O43818	51	S	10147	6902.1	8718.8	7044	7704.8	9513.7	10986	7862.9
O43818	53	S	10147	6902.1	8718.8	7044	7704.8	9513.7	10986	7862.9
O43823	328	S	20796	19005	20203	16927	24757	21181	19599	18578
O43823	339	S	5810.3	3969.4	4178.4	3427.3	5808.8	2945.3	5801.8	2725.2
O43847	94	S	24088	14278	23710	13227	24342	19248	25440	10860
O43852	69	S	7741.4	9276.7	3499.7	8979.4	2595.4	2889.8	6837.8	2291
O43852	44	S	15833	15125	13124	14090	15867	20870	36262	17773
O43865	2	S	9008.8	5631.2	4155.1	5398.4	5003.8	9157.3	6481.8	6844.3
O43896	1060	S	7027.6	9077.6	8302.6	8317.1	9012.5	10269	8869.3	8898.7
O43896	674	S	33591	49155	33114	49268	36213	35110	37456	40166
O43896	676	S	40814.4	55043.3	38257.4	54461.3	44470.6	40845.9	44231.3	46685.4
O43896	915	S	14206	14873	12969	13499	17733	13515	13055	12517
O43933	1181	S	5498.7	5443.4	6634.6	5069.2	10913	8731.4	10006	7208
O43934	204	S	10541	7959.3	10581	7479.6	8987.5	10076	11583	8883.8
O60216	545	S	33019	23043	48654	24620	40123	39288	24248	29974
O60231	103	S	14856	11092	15745	12381	11961	17513	13772	16145
O60231	106	S	14856	11092	15745	12381	11961	17513	13772	16145
O60232	103	S	6962.3	5515.6	6386.2	4524.5	6558.5	6160.1	6592.8	5216.5
O60237	947	S	2859.5	8801.7	6006.9	10675	4912.3	18705	3612.7	33261
O60238	117	S	2937.9	5510.5	4570.8	5705.3	7904.6	8081.4	5583.6	5131.5
O60238	118	S	2937.9	5510.5	4570.8	5705.3	7904.6	8081.4	5583.6	5131.5
O60238	120	S	7157.5	10491.3	9881.4	10646.9	12850.3	12477.1	11984.8	10125.3
O60238	63	S	12454	19910	10464	21834	14495	19450	19442	19262
O60238	64	S	12454	19910	10464	21834	14495	19450	19442	19262
O60239	375	S	1324.2	3648.8	981.92	3667.3	1151.7	2857.6	1982.6	2336.1
O60239	376	S	4180.4	12086.6	4722.32	12194.6	4652.3	11733.5	9606	11803.5
O60240	382	S	5844.9	9234.6	5388.6	6495.6	5470.5	14557	8043.4	23864
O60240	384	S	24550	38666	23003	27859	23629	62146	24900	108500
O60240	408	S	10952	11099	8769.7	11153	9239.5	9354.3	11922	29820
O60240	497	S	15914	60657	19387	35499	19362	41207	17057	196200
O60240	499	S	7940.5	16233	7573.6	12905	12153	18542	10155	41739
O60240	461	S	17562	21422	19672	19270	22481	24480	18481	23091
O60244	617	S	18297	12027	35296	12506	27412	27419	19120	17964
O60244	986	S	22471	12121	37087	14281	20341	13849	17607	13299
O60245	1011	S	13932	13791	9816.5	15026	9455.8	13180	15865	15644
O60245	989	S	4987.5	7791.6	4272.4	7514.8	4747.2	6199.3	7409.2	6153.6
O60256	227	S	95507	73866	85807	71963	101600	96080	85649	79888
O60264	66	S	10306	8391.2	10949	9301	11484	10710	11287	9731.5
O60264	116	S	3075.5	2343.3	2590.6	2298.2	3210.6	2442.3	3018.7	2837.2
O60271	265	S	30739	19433	24043	16861	22658	18381	23152	17299
O60271	813	S	17895	10256	12395	8955.2	9584.1	10760	11271	10217
O60271	815	S	21848	9815.9	8641.1	6938	7427.3	10171	8953.3	8356.3
O60271	332	S	22809	8551.5	13140	7550.2	11825	9305.2	16471	7316
O60271	730	S	127686	63886	86189	53779	88415	63673	96104	55748
O60271	732	S	74509	33659	52017	29332	55589	34633	55590	28871
O60271	733	S	228952	115081	174531	94162	176750	114052	171924	97920
O60279	325	S	5877.5	6764.5	6074.2	10953	6723.2	9224.9	6745.5	9661.3
O60279	240	S	10782.4	24213.1	11589.3	41051.9	15108.4	26840.7	17068.6	38559.1
O60279	241	S	10782.4	24213.1	11589.3	41051.9	15108.4	26840.7	17068.6	38559.1
O60291	106	S	9363.6	14045	12564	11804	15522	21965	14672	16388
O60292	146	S	12267	12606	12234	12585	19094	14349	27563	12360
O60292	317	S	4819.6	3314.3	4649.9	3699.1	6555.3	4511.2	9067.4	3302.9
O60293	655	S	14442	8679.8	12219	7644.7	13140	11444	14426	9710.9
O60293	1303	S	52310.1	44938.9	53622.6	38946.6	47036.9	50267.1	48593.9	39603.1
O60293	1304	S	43912	39380	46516	33328	40642	42761	40939	33276
O60293	1309	S	18996	23276	23753	18012	21642	21868	20463	17493
O60293	352	S	20225	10939	16148	11067	14415	15895	17420	18332
O60303	691	S	16931	12142	13063	15384	14133	14972	24595	21502
O60307	1215	S	5408.1	5053.3	4946.3	4945.2	5547.4	5675.9	5486.2	6225.4
O60307	134	S	11448	7491.7	10259	8736.3	11472	11745	11726	10213
O60307	146	S	19200.2	13998.4	17054.2	15505	19899.8	20107.8	20877.4	18580.2
O60315	1122	S	7210.5	7036.8	7571.3	8384.2	8159.1	9634.6	9967.4	8271.1
O60318	527	S	47638	41539	58942	39053	54853	52443	58256	40738
O60318	538	S	25783	19590	30652	18657	29090	23730	28170	19970
O60318	430	S	17869	12589	17716	12909	18235	13699	19308	12393
O60333	1487	S	61669	36920	41456	26726	42526	37293	35599	46790
O60333	1613	S	7836.7	5451	6511.6	4209.6	6772.9	4907	6474.1	4337
O60333	1057	S	13836	8675.5	8122.3	7023	5741	7489.2	11063	6712.7
O60336	1367	S	4266.2	4852.3	5257.7	5073.7	4660.7	5611.3	5616	8068.5
O60341	69	S	12080	8568.8	11491	9291.5	9982.2	11477	12318	9502.1
O60341	131	S	14030	13254	12680	11996	14036	14375	15397	13667
O60341	137	S	14030	13254	12680	11996	14036	14375	15397	13667
O60341	166	S	87322	58868	104560	57772	93295	80039	92280	64520
O60343	666	S	3418.1	3619.3	3155.5	3197.2	2030.6	3654.9	2940.3	3233.5
O60343	106	S	6180.1	6531	4246.8	6146.6	7164	9355.8	6279.2	6312.5
O60343	588	S	7769.2	6685.9	7254.9	10291	6934.8	11264	7571.1	10841
O60343	591	S	7769.2	6685.9	7254.9	10291	6934.8	11264	7571.1	10841
O60343	751	S	7419	5654.5	8395.5	7474.6	8951.1	9033	8163.6	8394.1
O60343	754	S	15100.4	22233.5	17197.6	17570.6	17859.2	23050	19242.6	22829.1
O60353	620	S	6011.9	7095.8	14152	6551.3	7346.7	8330.9	9827.2	7493.7
O60353	653	S	5667.5	7369.9	25415	6469.6	10665	6985.8	13735	7165.8
O60381	380	S	11602	12306	12098	11528	14470	13461	15641	15287
O60381	134	S	2584.9	1718.1	2408.9	2723.4	3427.6	2198.6	2424.8	3160
O60381	135	S	2584.9	1718.1	2408.9	2723.4	3427.6	2198.6	2424.8	3160
O60437	14	S	13245	13712	14924	13264	37151	20172	59991	16892
O60437	1657	S	15066	13361	15637	12103	21193	17866	21385	16557
O60447	776	S	2710.8	4297.1	2943.7	4257	2621.9	5217.7	3678.9	5427.9
O60447	778	S	2710.8	4297.1	2943.7	4257	2621.9	5217.7	3678.9	5427.9
O60486	978	S	42269	112440	51486	91587	60669	85640	74497	85075
O60493	72	S	30017	17665	27401	16612	32960	22444	23365	17966
O60496	282	S	5954.7	5070.2	5178	4985.2	7070.1	6383.6	6493.5	5484.9
O60499	2	S	1669.9	2196.3	1934	2271	1744.6	2401.8	1711.3	2881.5
O60499	134	S	15359	13096	13440	12372	15845	15287	16268	17160
O60502	364	S	52058	35544	39221	35442	31820	37202	36471	35947
O60503	1307	S	5786.3	9295	6755.3	7817.1	8198	4647.9	8375.5	6077.1
O60504	373	S	6771	21989	11994	20384	11601	25233	13421	21735
O60504	606	S	6442.8	9522.3	10755	7854.5	11555	10812	11803	9430
O60504	545	S	7179.4	12600	8253.9	11152	10279	17143	9510.4	13326
O60504	104	S	13276	20142	12032	14969	14948	19021	13757	14533
O60504	530	S	22221	30327	21895	33653	27106	47350	24882	36218
O60504	348	S	15978	10212	9490.5	10491	11277	10041	9254.9	15420
O60504	593	S	8123.1	5350	6932	5343.6	6159.1	8380.6	5833	6533.3
O60508	43	S	12456	10413	14872	8343	10457	13118	11945	9205.9
O60551	38	S	29314	18580	20157	18616	22169	18725	19993	18813
O60565	76	S	22929	22719	23625	22608	20540	29720	24557	24343
O60565	77	S	78340	80683	94583	81330	83673	89215	83444	77777
O60565	137	S	4933.6	4648.3	7799.1	5643.7	6373.4	4029.3	8194.1	2314.9
O60573	13	S	24532	16036	20848	17159	21562	18286	18272	15550
O60583	480	S	10213	4536.1	7711.3	5401.3	7330.4	6276.7	6987.6	7327.6
O60658	457	S	2852.3	4656	2364.4	4212.9	2724.4	4055.3	2611	5333.1
O60664	217	S	6189.8	5786	5941.5	6101.5	5498.8	5369.5	6588.3	4058.5
O60664	130	S	9995.6	22809	10609	23001	9587.2	9762	17432	8309.2
O60678	25	S	45724	27152	61783	25705	29866	29250	43683	23590
O60678	27	S	45724	27152	61783	25705	29866	29250	43683	23590
O60701	476	S	66779	46202	36148	30230	81917	56381	47846	48718
O60711	342	S	6120.6	5460.5	5653	5587.8	7753.3	7663	6594.5	6218.2
O60711	19	S	5243.7	4912.7	5605.8	6084.6	6219.4	6138.3	6312.4	5959.9
O60716	346	S	7236.1	13672	11683	13399	20242	15794	19814	16577
O60716	349	S	49575	67791	65781	68207	86377	71604	84036	74204
O60716	352	S	17638	19171.4	23969.7	18916.5	24088	21612	22010	25496
O60716	230	S	6412	5471.4	5138.9	5641.5	8160	6169.5	8258	6864.5
O60716	899	S	7482.2	8290.5	8515.6	10084	11104	10142	12715	10187
O60716	859	S	14027	16410	15824	14175	14262	17819	16686	13637
O60716	864	S	15931	25332	17212	22228	29917	19848	29392	21741
O60716	920	S	7792	9838.9	7032.5	10933	16082	11814	15036	16291
O60716	47	S	9897	7483.9	8480	7805.8	8140.2	8614.1	8821.1	10016
O60749	97	S	8494.2	7109.6	6723.5	7287.4	7981.4	8439.2	8211.1	7422.3
O60749	185	S	52592	33825	37792	33048	35521	39599	38921	43754
O60749	117	S	8008.7	4980.6	4669.5	5144.9	5727.3	6264.2	5991	7049.2
O60749	119	S	8182.9	2928.2	3092.6	3374	4335.8	4741.8	4851.8	6040.2
O60762	9	S	4722.2	2564.1	5504.1	2998.2	4918.8	5003.2	4101.2	3276.5
O60763	48	S	16838	35881	18364	32228	19399	78210	20250	85697
O60763	942	S	231353	151403	211284	128924	178692	153529	162436	115008
O60763	952	S	18377.3	10270.2	13904.5	9756.9	11161.6	10475.2	10269.2	9951.8
O60784	462	S	38333	42398	36681	41877	40255	56769	43565	48470
Q99880	39	S	41012	12867	28666	12285	24235	20345	14766	33755
Q99879	39	S	41012	12867	28666	12285	24235	20345	14766	33755
Q99877	39	S	41012	12867	28666	12285	24235	20345	14766	33755
Q93079	39	S	41012	12867	28666	12285	24235	20345	14766	33755
Q5QNW6	39	S	41012	12867	28666	12285	24235	20345	14766	33755
P62807	39	S	41012	12867	28666	12285	24235	20345	14766	33755
P58876	39	S	41012	12867	28666	12285	24235	20345	14766	33755
P57053	39	S	41012	12867	28666	12285	24235	20345	14766	33755
O60814	39	S	41012	12867	28666	12285	24235	20345	14766	33755
O60825	466	S	10518	10396	17231	9536.3	19339	11789	14231	9581.2
O60825	493	S	8161.1	18442	20575	13881	17017	23707	12970	16300
O60831	178	S	1897.2	3144.9	2085	2973.7	1735.7	4056.2	2211.4	5985.8
O60832	494	S	20311	20953	16289	20476	19214	22279	31835	19343
O60832	513	S	6584.5	14749	5402.7	13179	7863	12167	14072	12813
O60832	451	S	145781	192327	131287	186692	146552	240521	220019	212286
O60832	453	S	86618	111316	78208	111786	85967.3	141632	127186	129900
O60832	455	S	139064	173997	125572	173555	137133	221595	199185	195243
O60832	21	S	15741	8080.4	17565	8217.8	21680	13884	19950	12244
O60841	588	S	37804	26482	43580	22384.3	50311	33226	34788	28435
O60841	589	S	91376	42646.8	90178	35007.3	112523	58726.7	81362.7	45478.9
O60841	591	S	97114	50208	96599	41157.3	118681	66880	85767	54422
O60841	595	S	90221	42462.1	89522.1	35007.3	109607	58174.3	80904.4	45231
O60841	107	S	18981	40792	15888	41107	19402	47168	53875	44555
O60841	113	S	60013	66462	47117	75577	54362	74881	134183	84276
O60841	164	S	129600	85546	81646	92531	100120	125760	205330	98171
O60841	214	S	105730	64041	64858	64788	65479	82181	152550	73633
O60841	135	S	23389	11411	13414	17199	13145	12785	35884	12961
O60841	137	S	23389	11411	13414	17199	13145	12785	35884	12961
O60861	117	S	69106	80869	68269	69699	72195	80115	70623	70043
O60885	1117	S	60581	27596	50992	28121	46764	43469	40181	34013
O60885	469	S	28578	24890	31205	23565	27849	28175	24527	22603
O60885	470	S	20553	16582	22162	16330	20364	19269	20431	16546
O60885	1126	S	18916	18939	15742	24515	15816	21382	17970	21399
O60885	601	S	46405	23688	36360	23189	33248	27223	36729	27318
O60890	652	S	12197	13388	10577	10649	9414.3	23108	12109	16715
O60927	73	S	72333	55163	80536	50231	82911	65477	71908	58082
O60927	74	S	81712	61323	91457	56201	98313	73477	82811	66800
O60927	77	S	92152	68349.8	100368	62519.9	127062	81213.5	98502	75482.6
O60930	74	S	11266	10399	15235	12932	18292	12817	13570	12345
O60930	76	S	11266	10399	15235	12932	18292	12817	13570	12345
O60934	432	S	11882	13942	7571.1	11312	7710	19672	8965	26332
O60934	347	S	4200.2	4847.2	5018.6	5189.3	4782.7	5269.1	4114.6	4288.7
O60941	608	S	10560	9560.8	12471	9047.4	11622	13506	12450	11062
O75022	502	S	14152	8366.4	7341.1	6524.1	13332	9221.6	9727.1	7112.6
O75022	503	S	6648.5	3830.7	3698.9	3447.6	6069.5	5122.9	4817.8	4167.4
O75023	514	S	28815	26354	14197	16939	16742	28871	18236	27423
O75044	427	S	46193	55310	34032	49695	37588	46875	61010	44547
P0DMP2	426	S	46193	55310	34032	49695	37588	46875	61010	44547
P0DJJ0	427	S	46193	55310	34032	49695	37588	46875	61010	44547
O75044	990	S	8834.6	8392.6	7584.3	7543.7	8518.4	8606.6	10268	8430.9
O75044	994	S	33873.6	34340.6	30692.3	29462.7	28901.4	32310.6	40839	31276.9
O75052	188	S	2545.3	3129.5	3123.5	2576.5	3150.7	3566.7	3016.8	2972
O75052	192	S	2545.3	3129.5	3123.5	2576.5	3150.7	3566.7	3016.8	2972
O75052	194	S	2545.3	3129.5	3123.5	2576.5	3150.7	3566.7	3016.8	2972
O75052	195	S	2545.3	3129.5	3123.5	2576.5	3150.7	3566.7	3016.8	2972
O75056	428	S	12621	15207	15725	19721	13458	37729	12993	26890
O75061	570	S	38768	10634	11508	7820.1	12005	12579	10368	10048
O75064	732	S	4410.3	3738.9	5427.4	3223.7	3846.8	4441.6	4478.2	4207.1
O75064	736	S	4410.3	3738.9	5427.4	3223.7	3846.8	4441.6	4478.2	4207.1
O75084	568	S	3746.5	5435.6	3953.6	4503.4	3425.7	5169.9	5614.5	5753.7
O75112	129	S	17247.7	41545	22796	37395	21698.8	50032	20955.2	48395
O75112	121	S	50927	63271	58111	58264	53674	80116	51963	69197
O75112	123	S	105334	95760	103936	92043	95396	129592	88807	110056
O75113	245	S	20456	12601	17078	15122	18825	14750	22360	17009
O75113	398	S	5185.9	4688.8	4573.2	5227.8	6388.6	6015.9	7219.4	5439.8
O75113	300	S	4213.5	3875.2	4762.3	3675.4	4499.9	3555.1	7054.6	3577.8
O75113	288	S	6251.6	4367.9	6712.4	4469	6366.4	5043.4	8491.6	4717.4
O75116	1134	S	21225	17924	16889	14904	20302	15091	17482	14817
O75116	1137	S	8917.9	9580.4	8288.6	9270.7	7856	10417	10777	10736
O75122	368	S	10755	4683	7644.4	5841.4	6622.3	8041.2	7928.2	11148
O75122	370	S	10755	4683	7644.4	5841.4	6622.3	8041.2	7928.2	11148
O75128	235	S	8020.6	16978	17909	17454	28264	39911	10937	37530
O75131	242	S	34368	20098	32536	20342	27498	37687	23220	27245
O75131	243	S	10081	6630.2	9235.6	6201.2	8578.8	9957.9	7507.6	8023.9
O75132	624	S	2803.9	2608.3	4774.7	2698.1	5232.1	3879	4334.8	3189.7
O75140	579	S	2423.5	2535.5	2436.9	2511.7	2413.1	3262.8	2363	2604.8
O75143	361	S	5998.1	6353.2	6904.7	4843.4	7472.1	7349.5	7354.8	5334
O75151	882	S	7184.4	16074	6512	18835	7610.1	11004	12091	14420
O75151	474	S	6400.1	6790.5	7963.1	7114.9	7905.7	8230.3	7187.8	8315.6
O75151	539	S	15854	15620	14696	17014	21339	25757	20655	30110
O75151	899	S	27490	33545	27795	30652	27557	46157	45414	36822
O75152	290	S	15245	9571	12447	13727	18096	27804	15159	30239
O75152	758	S	55327.7	38883	44151.5	44401.8	68459	66417.5	74402.3	80319.3
A0A1B0GTU1	759	S	55327.7	38883	44151.5	44401.8	68459	66417.5	74402.3	80319.3
O75152	759	S	11536	10449.7	12512.2	9427.7	23214.7	20217.5	30579	17684.3
A0A1B0GTU1	760	S	11536	10449.7	12512.2	9427.7	23214.7	20217.5	30579	17684.3
O75152	761	S	42485.3	27739.7	30870.1	32782.8	44922.7	44497.5	46940	57199.3
A0A1B0GTU1	762	S	42485.3	27739.7	30870.1	32782.8	44922.7	44497.5	46940	57199.3
O75152	108	S	3934.8	1795.7	4360.3	1915.1	3113.3	2704	2681.5	2085.2
O75153	664	S	14599	7590.4	14605	6453.2	15256	9150.7	10071	7706.6
O75161	142	S	29155	21693	27692	20228	26041	26111	23795	22030
O75167	237	S	10818	15971	10186	18573	13139	15381	15444	19694
O75167	522	S	1587.2	1683.2	1465.1	2065.4	1396.1	1613.6	1854.6	2522.7
O75170	771	S	8326.3	10412	10499	9771.6	12865	14835	12781	13807
O75170	289	S	13323	11696	14922	12083	16259	18002	14823	13165
O75179	2401	S	27826	13812	23053	15834	34147	15859	28551	24495
O75179	2042	S	34008	32131	32794	30562	34773	43854	32091	35502
O75179	2045	S	20977.8	20941.8	22473.8	21702.8	22247.3	31574.8	21420.2	25622.9
O75179	1709	S	15993	3329.8	11062	3356.2	8078.6	3228.8	12200	3348.7
O75179	2067	S	19467	9114.1	27543	9591.4	16066	11367	16995	13296
O75182	739	S	5651.8	4388.9	6653.3	3740.3	5651.6	5819.7	6439.3	4373.6
O75182	740	S	8306.5	5570.9	8602	6127.3	6981.7	7022.1	7539.4	5960.1
O75182	122	S	12993	12851	15076	12739	12757	20285	13966	14292
O75190	277	S	8330.5	15474	11170	16370	10020	12081	11763	10419
O75190	15	S	10686	7591.4	11521	8077.3	15973	11627	14286	8849.1
O75312	4	S	4670.9	6815.4	4910.8	6405.7	5061.4	8054.8	5260.9	6750.7
O75324	49	S	14540	13261	13678	11675	13480	15335	13788	16386
O75348	68	S	8113.4	4917.3	6158.9	5087.6	11515	9847.3	8679	7385.1
O75351	102	S	338960	303380	337460	292700	397920	383700	500290	263190
O75362	441	S	8184.8	7410.6	12483	8226.4	13426	12406	11962	13658
O75362	445	S	8184.8	7410.6	12483	8226.4	13426	12406	11962	13658
O75363	399	S	3527.8	11607	5162.3	6423.1	7580	6203.1	3617.1	9464.5
O75367	173	S	11226	6344.3	10259	7212.2	10249	12868	6942.8	9685.5
O75369	2107	S	78506	81805	72883	55112	46198	116040	159770	58851
O75369	2481	S	30386	18335	23344	18545	24742	27097	26835	22152
O75369	1505	S	14291	14150	20264	10929	18024	11638	18500	9284.1
O75376	1472	S	14747	13135	18424	17058	18325	15831	20462	15839
O75376	158	S	33824.4	28395.7	41557	29628.6	39390.1	34473.6	31966.2	29178.3
O75376	172	S	9894.6	4922.5	12678	5618.9	8900.4	6905.1	7819.7	5885.1
O75376	2335	S	14639	13367	16176	19043	34792	34547	26317	27660
O75376	2337	S	21965.1	17728	25623.8	25713.6	42646.2	39809	33654.1	33161.4
O75376	1111	S	1753.7	1449.3	2368.2	1748.7	2087.3	2450.1	1940.7	2268.9
O75376	224	S	61996	46521	78946	50772	69360	65160	56234	50325
O75376	2151	S	8834.3	7091.3	7118.7	7040.5	9067.7	8056.1	9354.9	7820.8
O75376	2120	S	12307	13708	16607	15390	16010	19449	15746	15864
O75376	1977	S	1336.5	1688.4	2978.7	2129.9	3019.3	2729.1	1635.8	2110.3
O75376	1980	S	11873	11016	12574	11173	16641	14040	13182	16668
O75376	2102	S	5346.2	5478.2	5524.9	6048.2	5226	6410.7	8052.5	6633
O75379	30	S	9449.9	7979.7	6159.5	6316.6	8202.5	6816.3	8863.5	5543
O75382	427	S	49021	49422	54938	51070	56065	67735	51294	48018
O75382	7	S	29782	51289	35695	45129	34944	51995	35513	43247
O75385	450	S	27038	17043	26847	19733	28576	21247	31348	22987
O75387	267	S	8110.5	11818	8517.1	11487	23624	18049	9242.9	13094
O75387	237	S	6167.6	9445.1	6196.2	8240.7	19241	16211	6737.9	13174
O75396	177	S	22484	15676	20943	14970	22194	25910	21141	21409
O75396	168	S	14627	11774	10476	13466	10775	15858	13662	17173
O75396	137	S	26104	33461	29165	35066	24374	52911	30010	46481
O75398	176	S	16769	14760	18201	15312	18418	18797	17351	19468
O75400	933	S	50813	23828.9	44147	20321.8	41842	30033.3	39740.2	20515.2
O75400	935	S	47953.5	22480	43397.2	19220.8	43462	29097.4	41573	21545.9
O75400	938	S	60027	30460	51118	25936	53606	38379	51074	28132
O75400	883	S	51378.2	43077.5	54099.5	42112.8	67553	47585	94482	34161.9
O75400	885	S	44941.6	38275.9	50576.5	38207	55690.5	42981.5	78865.5	30146.4
O75400	888	S	75836.2	61028.5	68697.5	58221.8	93962	65427	141063	49758.9
O75410	591	S	2506.4	5623.9	3428.6	4046	8557.4	7748.8	5248.1	5543.4
O75420	137	S	9213.1	6904.9	7303.6	8196.5	6048.6	7007.1	7277.1	7787
O75420	157	S	15914	9826.3	16087	11486	17739	15618	17975	12402
O75420	538	S	12789	8945.4	11759	7887.9	12069	10285	9028.7	9359.4
O75427	25	S	4045.2	3560.5	3860.5	4141.1	3212.9	4266.9	4253.6	4146.6
O75427	281	S	15393	8451	12060	8954.2	9364.2	8314.6	10334	8610.6
O75427	346	S	9189.6	6496.8	9477.1	6898.8	8737.4	8379.6	9416.6	6964.9
O75427	521	S	8715.1	7738.8	9554.7	7634.2	11804	10296	10998	8086.6
O75448	862	S	13335.5	12302.3	17712	11716.8	11628.7	13684.7	13952.7	13993.8
O75448	873	S	14046.5	10342.1	13603.2	9585.5	11620.6	12319	12379.3	11537.3
O75449	170	S	40386	29572	58029	31202	49710	36652	49260	30060
O75475	129	S	98762	150588	76490	187975	158747	241010	130847	232220
O75475	106	S	35392	59528	27212	67749	51186	74828	58002	84221
O75475	273	S	41080	41453	37079	60631	40601	130770	53516	98462
O75475	275	S	55024	49540	46831	69117	50528	142580	62919	108350
O75494	23	S	19761	19377	19475	18850	16485	21673	18471	21271
O75494	133	S	13465.5	14694.6	10830.4	14350.5	17448.5	16409.5	18102	15410.5
O75494	131	S	7904.63	10372.6	6089.91	10460	10939.5	11012.3	12892.4	10750.5
O75494	129	S	7387.2	9716.9	5493.5	9661.6	10215	10275	11864	10050
O75508	198	S	5045.7	20471	4681.1	20511	7184.6	11752	9066.6	11938
O75509	541	S	12808	9171.5	16063	8076.5	16296	14480	17914	10019
O75563	47	S	14008	9646.1	12401	8561.2	10178	11807	13947	8902.7
O75563	6	S	30444.6	24319.9	31310.7	26934.4	28177.1	34987.6	30740.2	26671.2
O75564	68	S	152730	17802	228740	19299	138430	79929	31680	26142
O75564	69	S	152730	17802	228740	19299	138430	79929	31680	26142
O75569	18	S	50736	62228	49105	55887	62133	62356	101630	64172
O75592	3931	S	20230	16687	18939	14216	18548	19534	18986	15160
O75592	3932	S	43696	32511	43471	29955	42131	37173	45945	35825
O75592	2319	S	1066	1716.3	1367.4	1743.9	2196.1	3926.4	1775.4	2580.1
O75592	178	S	22042	17331	23384	17052	26695	21582	20039	16281
O75592	181	S	46345	46979	52201	48495	63069	56879	49956	43854
O75592	183	S	46345	46979	52201	48495	63069	56879	49956	43854
O75592	1624	S	4972.7	3517.1	4303.1	4288	4609	4962	4293.3	3864.3
O75592	3505	S	9429.9	8873.5	8182.8	10382	11164	11603	11729	9741.7
O75592	2871	S	15919	18636	15355	18699	17915	24359	23330	19131
O75626	288	S	2694.9	2456.1	3273.4	2642.5	3522.2	3162.1	2934.9	3058.8
O75628	18	S	1738	2132.8	2174.8	1630.1	2760.3	3475.9	1601.9	2833.2
O75628	24	S	4896.8	8710.7	4717.2	7694.7	5926.4	14120	6067.1	8847.2
O75628	289	S	5599	4307.6	4511.9	4638.7	5589.9	5386.1	6092	4792.4
O75628	291	S	5599	4307.6	4511.9	4638.7	5589.9	5386.1	6092	4792.4
O75643	225	S	83820	65445	98938	71447	85297	79604	93464	69590
O75665	774	S	39064	23404	30254	22878	34283	28286	32870	23267
O75665	686	S	23444	10549	15972	11317	17476	14003	20717	14884
O75665	735	S	5099.1	3108.5	3563	3535.3	6586.6	5786.5	5004.1	8965.9
O75674	321	S	10421	10124	9054.8	7672	9962.6	11439	11556	9331.6
O75674	323	S	3487.5	1517	3611.6	1188.8	3309	1951.2	2624.2	1265.4
O75676	343	S	14077	13972	17113	12468	16888	17769	19015	15677
O75676	347	S	32572	29151	33712	26847	35282	36775	37260	37316
O75676	682	S	1590.1	1501.6	1636.2	1040.9	2439.5	1927.8	1652.6	1671.7
O75683	138	S	34712	12166	17120	13340	17887	13775	23374	12594
O75691	2601	S	10108	5994.3	14892	5563.9	9192.5	7169.5	8988	4518.2
O75694	994	S	4627.7	3167.2	7243.5	2809.4	4934.2	4807.5	5184.1	2965.9
O75695	28	S	5393.1	4342.1	4799.3	4048	5569.3	4197.3	5263.1	3182.5
O75764	115	S	8888.2	7290.7	14021	9795.8	13689	12916	6802.1	9467.9
O75781	116	S	2016.5	2714.8	1941	2657.7	1609.5	3247.7	2055.1	2696.6
O75815	395	S	9469.9	6876.2	9746.4	7989.2	10741	10315	12076	10237
O75815	290	S	3149.1	1164.1	2446.5	1441.4	1836	1771.1	2103	1614.6
O75821	42	S	117465	73198	98352	64618	93680	59133	81578	55823
O75822	11	S	11090	9182.3	9476.8	11060	8172.5	10540	11574	10178
O75864	591	S	28001.6	25018.9	31206.5	22266	34637.4	32843.6	37919.1	26674.7
O75864	597	S	34449.8	30690.6	36911	26882	42572	34722.6	44524	30305.8
O75864	561	S	2698	2332.9	4243.9	3001.9	4365.8	3754.6	5773.1	2800.3
O75864	50	S	15850	13062	18667	9899.1	32902	14990	29023	10539
O75907	18	S	5668.3	6527.7	7372.4	6853.8	8554.4	7712.5	7046.7	7068.2
O75907	14	S	5668.3	6527.7	7372.4	6853.8	8554.4	7712.5	7046.7	7068.2
O75909	340	S	54646	31692	71561	34019	53488	47401	48600	40995
O75909	8	S	20927	13472	19877	13041	18149	14439	16408	11401
O75909	324	S	13250.4	6389.7	14837.7	5946	10675.2	9649.7	12587.1	5883.3
O75909	328	S	894.32	376.1	1526.3	570.52	790.99	663.88	883.58	556.98
O75909	329	S	8137.9	4203.37	10934.3	4369.06	6603.8	6764	8394.6	3953.33
O75925	503	S	17889	14561	19750	16264	22324	19150	18722	19692
O75925	483	S	8733.1	7208.6	11220	7644.8	10969	9228.5	8933.3	9831.9
O75925	485	S	8733.1	7208.6	11220	7644.8	10969	9228.5	8933.3	9831.9
O75925	488	S	8361.1	7054.7	13377	8178.7	10745	10534	9511.5	9174
O75937	35	S	19310	28163	24404	24513	21791	46560	23836	30693
O75962	2455	S	3730.6	4595.6	4397.7	4510.7	3414	4329.4	6388.5	4695.7
O75962	2459	S	3730.6	4595.6	4397.7	4510.7	3414	4329.4	6388.5	4695.7
O75962	2477	S	53238	48511	47984	49716	48396	52729	59128	58915
O75962	1785	S	31049	22646	12503	22214	10089	16786	36748	22585
O75962	1786	S	31049	22646	12503	22214	10089	16786	36748	22585
O75962	1723	S	2629.8	3888.7	2803.8	2809.2	1727.9	2522.2	3128	1945
O75962	1724	S	2629.8	3888.7	2803.8	2809.2	1727.9	2522.2	3128	1945
O75970	483	S	2802	2035.7	2281.5	1250.2	1706.4	2423.8	1787.2	2164.4
O75970	354	S	9428.5	7455.6	7694	7193.8	8670.3	9796.6	7531	8565.3
O75971	96	S	609.35	1034.7	398.64	1378	850.3	802.25	1703.2	1544.8
O75995	97	S	6832.6	9956.6	5177.5	16324	10333	8957	8756.4	9752.3
O75995	146	S	52592	30902	31851	32304	45104	46832	28969	33962
O75995	153	S	5071.4	5120	5132	4340.3	5259.9	5567.2	4805.3	4520.9
O75995	25	S	51263	45366	34716	78600	53917	59590	49315	68070
O75995	26	S	30250	22090	21035	40810	29707	30283	25450	35033
O75995	27	S	187623	116654	71004	242180	200200	285167	220055	503646
O76003	117	S	5643.4	6015.7	5256	5511.8	5700.2	9039.4	7805.7	8648.9
O76021	361	S	37513	44229	34033	41519	30517	67639	76729	62335
O76021	90	S	3200.4	2116.7	2787	1667.1	2995.7	2536.2	2789.5	1810.6
O76024	235	S	18076	18662	15733	14754	16617	30338	26501	24688
O76039	714	S	17743	17620	15097	41408	9615.2	17608	28058	31034
O76039	306	S	5119.8	6378.8	10201	5948.4	10332	6845.7	8896.1	4966
O76070	124	S	7202.4	13607	4855	11393	5781.4	17042	13295	16924
O76074	102	S	6744.6	11924	6378.8	9031.4	7901.4	15792	7515.3	14313
O76080	48	S	17607	21716	18471	22188	21945	20568	23467	19645
O76094	621	S	10910	29494	10221	27400	14214	26416	26539	24517
O76094	625	S	10910	29494	10221	27400	14214	26416	26539	24517
O94759	38	S	13675	10798	12508	11214	15500	11488	11673	10853
O94762	488	S	24293	15356.4	20880.1	18374.1	22738	13391.7	21434	12666.3
O94762	491	S	13928	10552	12567	12214	10821	8088.1	11104	8195.2
O94763	421	S	3036.5	2227.5	2569.6	2340.4	2364.7	4147.2	2965.7	2517.1
O94763	424	S	3036.5	2227.5	2569.6	2340.4	2364.7	4147.2	2965.7	2517.1
O94763	372	S	18036	16886	17726	23691	22296	20301	39295	23680
O94763	13	S	5277.1	6171	6544.6	6170.8	6350.7	6862.7	5589.1	6226.3
O94763	442	S	41135	31388	37984	32414	32929	38672	48640	37661
O94769	213	S	27601	101540	33169	46668	27622	36656	81098	36439
O94769	304	S	12762	15064	13245	12992	13420	20978	10923	16022
O94776	435	S	11446	13093	14693	12296	14350	13661	13796	13879
O94782	66	S	8941.6	5541.4	10255	5044	8559.2	7827.6	9092.2	6549.7
O94788	351	S	12817	8384.4	8999.5	6983	21920	10100	11664	7925.5
O94804	450	S	13272	12461	11381	15029	9553	13173	13337	16242
O94804	454	S	14036	14887	14331	19628	11970	16438	15378	18182
O94804	455	S	6579.6	6572.5	4540.1	9272.5	3226.7	6869.4	5708.6	9110.1
O94804	514	S	8527.4	11088	5310.9	20265	6605.9	15694	10867	28584
O94804	438	S	2024	1603.5	2107	1753.7	1862.9	2565.4	2278.5	1960.6
O94804	444	S	5551.6	10533	5154.5	7750.7	4767	9493.8	6718	7845.8
O94806	731	S	26333	71890	47057	52370	61334	64195	74923	60206
Q15139	738	S	26333	71890	47057	52370	61334	64195	74923	60206
Q9BZL6	706	S	26333	71890	47057	52370	61334	64195	74923	60206
O94806	252	S	9282.7	9471	9543.1	9304.8	12984	11449	10988	11390
O94806	213	S	15029	16853	14627	17461	14006	21973	15616	24273
O94806	735	S	15992	21685	16584	18007	15475	20201	21908	15756
Q15139	742	S	15992	21685	16584	18007	15475	20201	21908	15756
O94806	391	S	6028.9	4936.2	5744.1	5533.5	5473.3	5081.8	6873.6	5302.7
Q15139	397	S	6028.9	4936.2	5744.1	5533.5	5473.3	5081.8	6873.6	5302.7
O94808	244	S	99296	61231	54108	49431	41876	45412	64519	40255
O94808	245	S	5533.8	2831.6	2563.6	2631.6	1597.9	2142	3050.8	1289.1
O94811	18	S	4955	4519.9	11108	4969.4	6010.7	7983	6037.4	7823.2
O94819	310	S	1279.6	2952.2	1401.5	3854.9	964.76	5684.8	1044.2	4706.8
O94819	314	S	1279.6	2952.2	1401.5	3854.9	964.76	5684.8	1044.2	4706.8
O94819	87	S	14245	9938.5	15810	10419	13809	14842	14038	12819
O94823	617	S	4394.4	8061.2	4131.1	8479.9	5036.7	8643.4	3983.3	9497.4
O94826	91	S	109300	94998	125440	93067	151030	109540	111800	97001
O94826	96	S	7371.2	4771	6561.7	4405	9099.2	5844.1	4892.2	4642.1
O94827	249	S	705.09	1288.3	977.92	1592.6	1330.1	1701.9	1024.4	1892.3
O94827	907	S	4429.2	4334.3	5104	4354.3	4702.4	5663.7	5215.5	4766.7
O94827	911	S	4429.2	4334.3	5104	4354.3	4702.4	5663.7	5215.5	4766.7
O94832	493	S	10007	21359	14658	14788	20009	13187	12894	13769
O94842	178	S	54731	40715	49779	38113	52116	52029	46652	43654
O94842	182	S	40930	30032.9	35047	27180.7	36442.9	36926.5	32366.2	30732.5
O94854	668	S	72191	95519	44540	47537	69399	63827	82549	54789
O94864	108	S	22875	13810	34240	13325	28805	19190	21763	12447
O94874	458	S	7298.3	13353	8747.6	9475.3	16082	12490	13978	13491
O94875	166	S	22786	17354	17694	19471	16850	21103	21607	20975
O94875	1017	S	34814	38049	41494	42487	36362	69916	35416	66987
O94875	259	S	12807	20717	13998	21216	15520	54646	14648	50699
O94875	299	S	10930	12588	12748	19870	13137	17200	16179	17096
O94875	302	S	33130	42792	39440	52044	46970	79378	42226	89250
O94875	154	S	19887	17603	14274	23888	17145	24746	14009	23199
O94875	157	S	1341.4	3947.6	1989.7	3970.2	2182.2	6278.5	1601	4330.4
O94875	150	S	18974	13953	17046	14552	16090	23485	18940	18184
O94875	278	S	21768	46697	25158	48589	26377	81424	22337	68608
O94876	413	S	7171.2	7391.5	7962.6	6924	10226	5505.2	13270	5759
O94876	382	S	3201.8	2685.5	3173.4	2804.2	3296.9	3548.3	3794.4	3434.8
O94880	290	S	16361	21722	18167	19230	27919	23686	22104	20869
O94880	835	S	6494.4	13999	7061.7	12733	13430	13542	14412	16158
O94885	507	S	10648	12234	11064	12981	10600	13203	13547	10920
O94885	442	S	21803	38744	16388	32809	20360	24848	25989	27944
O94885	1028	S	30805	18119	17668	16424	13583	20138	16269	20512
O94885	1031	S	8607.3	7995.7	7854	7679.4	7777.4	8729.9	7377.2	8372.7
O94885	743	S	4584.5	5968.3	3862.5	6941	5539.1	6072.8	8324	12728
O94885	486	S	4862.2	6190.6	5125.5	7176.1	5030	7012.2	5090.5	6017.3
O94885	1051	S	9336	5806.6	7679.1	6591.6	6270	7823.5	5605.8	5669.2
O94885	90	S	43584	43212	38217	41850	32791	36993	35547	36597
O94885	837	S	9322.7	11498	8224.2	8083.6	8067.7	9852.6	6920	9442
O94885	839	S	9322.7	11498	8224.2	8083.6	8067.7	9852.6	6920	9442
O94885	813	S	13712	13976	13951	11732	12285	17260	12050	14507
O94885	387	S	8816.3	13483	8823.4	8554.9	7437	10732	7573.3	7964.4
O94885	407	S	5084	7668.1	4314.4	4467.5	4727.3	5967.3	4071.5	5023.2
O94886	735	S	40309	27649	40206	28803	48555	40450	47729	27674
O94886	739	S	58038	42570	55615	44007	74011	63278	71397	45692
O94887	876	S	8684.4	12358	11151	10862	11835	13488	15410	12648
O94888	288	S	6126.8	5594.2	5560	4872.4	6233.9	5155.5	5706.4	6672
O94913	705	S	3909.3	4383.4	3362	6091	7572.4	3949.5	7925.3	4993.2
O94913	777	S	31028	23426	30188	22404	46168	35070	31297	34394
O94913	489	S	17411	6978.7	11810	7643.8	9760.7	13023	12979	11813
O94913	494	S	17411	6978.7	11810	7643.8	9760.7	13023	12979	11813
O94915	1914	S	6990.3	5381	5183.6	5280.1	4736.6	6630.7	6303.8	5635.3
O94915	1337	S	4445.5	2602.5	2545	2467.9	3282.1	2916.3	2897.6	1981.8
O94915	2272	S	7545	10618	8106.3	8397.7	8259.7	11501	10509	9870.8
O94921	134	S	18567	27094	21939	21485	22792	25154	21796	18966
O94921	95	S	35483	41833	48684	36147	42738	56408	51723	38746
O94923	73	S	4627.6	4432.6	6223.9	4297.3	3253.5	4554.4	4666.9	4238.5
O94929	373	S	20781	9420.9	9790.2	9455.7	9845.9	10373	11819	9055.1
O94929	503	S	28162	12127	11068	11948	12149	12359	13895	15576
O94929	277	S	13438	7451.3	11268	7694.7	9461	9693.5	13748	11587
O94929	282	S	5027.6	2654.1	3877.5	2894.9	3592.1	3396.5	3626.5	2907.5
O94929	585	S	12934	2965.4	3862.7	3049.6	3773.6	3302.2	4348.4	2628
O94956	34	S	9383.5	14842	11277	11967	13240	12747	8748	11450
O94956	320	S	13387	15825	13230	13334	14233	13621	10103	11546
O94964	1320	S	6071.3	5273.9	6922.8	5502.1	5487.9	6481.1	7093.8	6172.4
O94964	1017	S	54610	33248	54025	31903	42960	32580	40206	32798
O94967	422	S	4284.7	5156.2	3950.3	4493.1	3617	4121.6	4054.4	4912.6
O94967	304	S	4869.2	3704.4	4892.3	3957.7	4471.1	6261.5	4953.1	5440.3
O94979	799	S	234550	189340	228970	166930	262070	194530	278620	169030
O94979	527	S	68591	82578	68494	71041	64236	67139	70256	61484
O94979	532	S	31719	37067	35005	33845	43360	41867	40562	34318
O94979	1163	S	6670.5	4854	5871.7	4588.5	5572.4	5692.5	5806.8	4554.3
O94988	597	S	6316.7	3718.4	9645.8	13103	7474.6	9234.1	10880	8475.5
O94988	652	S	34706	16884	23230	18542	27952	27921	16031	21044
O94989	109	S	2314.5	2519.6	1319.1	1904.3	1713.8	2410.2	1203.2	1925.6
O94992	233	S	2320	1429.7	1834.6	1107.7	2046.9	1550.9	1916	1202.3
O94992	237	S	2320	1429.7	1834.6	1107.7	2046.9	1550.9	1916	1202.3
O94992	252	S	2320	1429.7	1834.6	1107.7	2046.9	1550.9	1916	1202.3
O94992	97	S	3799.9	3200.4	4649.3	3169.3	5387.6	4483.9	4503.2	4142.9
O94992	98	S	3799.9	3200.4	4649.3	3169.3	5387.6	4483.9	4503.2	4142.9
O95049	103	S	6274.8	9960.4	10837	14718	20290	12743	10372	10015
O95049	112	S	33302.8	40752.4	48555	46336	100168	56611	41472	37879
O95049	203	S	29456	31155	49743	34277	89266	62769	30611	34431
O95049	164	S	27917	45315	50268	60481	104950	66291	33668	43639
O95049	319	S	7717.9	8433.2	13042.9	9280.2	25435	20186.7	7204.1	8314.9
O95049	327	S	1181.1	2610	5981.4	3449.6	11146	6822.7	2007.5	2533.2
O95049	591	S	1245.3	1124.3	1719.3	1812	3389.7	2021.9	1272.4	1838
O95049	856	S	7471	13223	8129.1	15499	14578	18482	12834	18468
O95049	371	S	5393.2	6091.2	8906.5	7813.9	10492	9385.3	9668.1	9604
O95071	2241	S	12236	6231.8	11149	6112.9	10039	9450.1	7323.9	10043
O95071	2369	S	24794	14628	22088	15328	28616	19349	24813	17563
O95071	1549	S	13350	12654	13287	11699	18049	16574	18048	14932
O95072	286	S	12488	8700.8	11288	7830.9	18779	10089	9360.7	10455
O95104	154	S	26719	19236	36251	25896	36545	28106	37270	29748
O95104	656	S	3971.9	2848.3	6027.2	4240.8	4096.7	4308	4932.5	3599.3
O95136	343	S	5121	7505.9	3943.9	10566	4912.9	5988.7	4792.1	6361.8
O95155	105	S	67937	46080	55022	31753	59501	51607	69704	48224
O95155	76	S	8485.8	6286.1	6946.1	5545.1	7059.5	7437.1	7472.8	6648.9
O95155	78	S	10822	8781.5	11510	8480.5	11862	12974	11602	11720
O95155	88	S	18446.5	15434.6	18938.1	15039.8	17249.5	16016.4	20259.8	15108.7
O95155	101	S	6107.4	8239.4	6486.4	6948.8	6601.9	9356.8	5943.4	10349
O95171	195	S	5237.5	4809.9	5075.4	4276.1	5606.2	4981.6	13325	4835.5
O95171	196	S	5237.5	4809.9	5075.4	4276.1	5606.2	4981.6	13325	4835.5
O95171	389	S	14913	14434	14973	18413	62351	24105	18381	16424
O95171	347	S	3046	2866.7	4125.2	2332.5	4544.1	3711.1	11708	2443.6
O95171	475	S	9963.9	6931.8	12581	7463.1	12671	8265.8	26592	6461.2
O95197	30	S	3092.8	3149.1	4318.8	2890.5	4479.5	3012.8	4318.5	3357.3
O95208	173	S	13776	7676.9	8048.9	7051	7724.7	5590.5	7497.3	6226.2
O95210	211	S	100340	52401	60099	44891	80544	95906	56391	64009
O95210	145	S	9466.8	6559.9	4461	6315.3	6792.1	9484.1	5498.6	7282
O95218	120	S	59279	93897	66855	109040	85740	78540	156550	80512
O95218	153	S	35034	148370	35778	180780	86105	100550	255780	138030
O95218	188	S	61727	68226	51784	98851	49150	40256	120460	35948
O95232	431	S	33156	27204	24551	27767	29470	31863	42211	29466
O95235	532	S	9664.1	6230.4	7886.7	7335.5	7068.5	6991.2	6084.8	8921.7
O95292	156	S	10698	11738	11458	9725.9	12357	14548	10038	8817.1
O95292	158	S	13322	16909	13942	14574	16053	23118	15255	15946
O95292	159	S	10698	11738	11458	9725.9	12357	14548	10038	8817.1
O95292	160	S	36025	39700	35395	30038	55189	49110	37315	35570
O95292	206	S	17061	25483	29380	20654	27644	41781	21387	26105
O95295	133	S	3647.6	3628.4	2896.7	3799.4	4230.1	5569	4020.3	4040.4
O95297	204	S	19482	13857	15156	13274	14204	13322	15652	11600
O95297	219	S	24094	18183	17023	17486	25858	29552	17712	22238
O95297	221	S	38427	26586	31068	27287	39918	41324	35555	37115
O95359	2134	S	1731	2452.7	2903.8	2374.9	2143	6920.2	1752.6	10452
O95359	2317	S	29506	17522	22343	21455	18704	25806	18555	28552
O95359	2321	S	29506	17522	22343	21455	18704	25806	18555	28552
O95359	2359	S	17202	12658	18373	15671	18225	18542	16131	23153
O95359	2569	S	14722	16412	22572	16732	15924	22322	11635	25195
O95359	2072	S	9324.9	10804	13299	12029	12899	23518	11057	27501
O95359	2256	S	38723	15547	26845	16087	20747	21537	21168	19928
O95359	2226	S	2765.6	3438	3808.8	3389.6	2854.3	6818.4	2597.5	7130.6
O95359	962	S	8909.5	10696	11188	9904.3	12895	18693	9176	16493
O95361	27	S	26563	13428	16955	11286	15804	13334	27319	13590
O95361	60	S	179640	61576	96805	42490	97234	55222	181660	55234
O95361	62	S	33947	13147	19639	11679	20399	13038	33512	12814
O95365	337	S	30185	18902	37366	25707	29367	30034	37550	22896
O95365	525	S	11406	15443	12853	14915	10940	22900	16536	19502
O95365	549	S	48932	30386	49137	36417	45738	45635	50945	35447
O95382	251	S	7869.8	5448.1	6532	4767.3	7799.2	7116	7721.3	5056
O95394	498	S	7350.7	7480.9	7804.2	6850	8783.2	6708	7546.6	6282.8
O95394	64	S	164310	227620	160460	141490	142440	133090	181320	124250
O95400	46	S	7816.7	12985	7715.9	14403	17338	14092	29414	14011
O95400	49	S	100753	87146.2	91069.2	83465.3	112665	85474.7	108600	68257.8
O95400	60	S	4999.9	9580.3	5059.7	10584	12233	10097	23033	10432
O95400	195	S	13058	5365.4	10510	5825.3	7348.7	6367.4	10358	4146.2
O95402	447	S	16531	10289	14551	10581	15416	16347	13440	11970
O95405	668	S	5515.7	4309.8	4559.1	4361.5	5565.2	5289.5	5696.4	5166.1
O95425	961	S	4770.2	8673.8	5050.1	12524	6653.8	11177	8951.2	10474
O95425	50	S	8825.3	8264.3	7986.1	9756.4	11699	12875	11911	11916
O95425	673	S	38416	53040	38998	66689	55828	58084	59656	58697
O95425	238	S	3333.6	2746.5	1960.5	4248.8	3718.3	7032.7	3326.8	11043
O95425	245	S	61378.6	56967.5	49407.5	84231.8	90849.3	119913	70714.8	139543
O95425	707	S	13574	17098	8147.1	37459	22005	21194	17053	30210
O95425	914	S	17872	21930	15838	28381	19864	23433	18504	27724
O95425	1225	S	6778.9	7237.5	10440	32284	31927	48114	37582	56008
O95425	221	S	1599.2	1770.2	1690.5	1676	2925.2	2003.3	1653.1	1748.4
O95425	547	S	20888	54870	21943	66793	27918	217800	29443	271050
O95425	549	S	9277.3	15221	9970.2	18262	9294.2	39916	3573.3	122360
O95425	63	S	24337	21904	16577	25697	24559	28442	24202	37019
O95425	65	S	19916	14221	12237	14815	17833	16279	19056	19686
O95425	66	S	24337	21904	16577	25697	24559	28442	24202	37019
O95425	261	S	51914	52660	45160	53673	54515	88285	52200	79193
O95425	263	S	15989.5	18591.4	18141.1	20830	22346	30641	18286.7	30704
O95425	270	S	43736.4	47028.5	39685	46611.3	45047.3	78445	44077	66205
O95425	1322	S	4484.6	7737.8	3828	7259	5118.6	11605	7191.9	9500.1
O95425	1120	S	3858.3	2671.2	3229.4	3218.1	4244.3	3469.9	3669.7	3226.4
O95425	968	S	3863.8	4880.3	3342.5	5587.6	3533.5	6574.8	4279.8	7124.5
O95453	619	S	9836.6	6361.5	10282	9930.4	10447	7912	13374	6678.4
O95453	583	S	3800.8	3268.4	3654.2	4606.2	3117.7	4294.5	4331.4	5050.5
O95453	163	S	18489	9376.8	15946	9386.1	14029	11286	12237	9219.7
O95466	1031	S	288880	127490	232770	153930	184170	200680	244300	136630
O95466	184	S	53602	17006	24682	34951	26334	25956	37811	52833
O95466	624	S	55074	42809	31729	49909	40172	60435	52243	47702
O95471	206	S	15253	25958	23276	39110	15516	18832	15527	20611
O95471	207	S	5734.7	12017	22902	21452	12657	12126	12800	7319.3
O95477	2234	S	9968.9	8232.5	7105.3	7412.6	7013.5	6202.2	7635.6	7357.2
O95477	1296	S	78568	40228	48813	31489	43067	37171	42343	35593
O95487	1224	S	48081	35099	46480	32759	46306	48687	39461	33840
O95503	301	S	1941.7	2396.7	2403.4	1698.8	2616.3	2851.6	2243.7	2275.3
O95544	64	S	15244	6659.5	16982	9106.1	12510	14627	12577	10468
O95544	46	S	12428	8009.7	16332	8960.5	12494	12473	11473	10140
O95562	9	S	9302.2	8970.9	7383.1	8762.1	12617	15772	12910	12521
O95602	1429	S	58663	24267	79743	22801	42352	29455	52505	23067
O95602	1489	S	8290.9	1696.1	8021.8	2148.7	2945.2	2785.5	3807.7	2582.5
O95630	2	S	7090.3	10679	8640.5	11136	8284	11120	10492	11956
O95633	255	S	25996	26380	38334	25774	28960	27241	31767	22303
O95644	233	S	12179	14339	12981	15620	15106	15381	16219	24120
O95644	269	S	8456.4	9160.4	9439.5	14443	11911	13302	12466	18550
O95644	542	S	8208.1	4376.8	5522.7	3879.3	6832.2	6941.3	5999.8	5915.1
Q12968	546	S	8208.1	4376.8	5522.7	3879.3	6832.2	6941.3	5999.8	5915.1
Q14934	532	S	8208.1	4376.8	5522.7	3879.3	6832.2	6941.3	5999.8	5915.1
O95671	228	S	6654.7	7210.4	6981.1	7515.3	5829.8	7606.3	7385	7517.2
O95671	239	S	3228.8	4944.4	3228.5	4316.3	2964.7	3249.4	3065.3	3455.1
O95674	60	S	11524	10577	15091	9938.9	15570	17610	17166	17479
O95674	21	S	67576	50557	60267	49575	58085	62216	54116	48985
O95674	23	S	11710	9931.4	13119	9893.8	13954	13057	9844.5	9400.7
O95674	33	S	3842	7513.3	5258.4	7087.4	3773.3	10348	4469.4	8157.6
O95684	152	S	9189.9	6534.1	9237	6475.5	7859	8067.1	7328.9	5856.2
O95684	156	S	136681	84491.1	135321	79201.5	126913	103102	112142	88194.2
O95684	160	S	83253.9	49909.1	86324	46442.5	74926	59302.1	66465.9	50391.2
O95685	74	S	24202.2	14903	32976	14937.6	23283.1	24568.9	21558.2	17766.5
O95685	78	S	18174.7	10422.3	22885.5	11219.9	15923.2	18566.6	14268.3	12793.8
O95685	25	S	3798	4742.7	4357.5	4024.1	4982.6	3648.9	7075	4098.8
O95685	28	S	3920.5	4806.5	4761.6	3900.8	4216	5078.3	4642.3	4588.9
O95696	128	S	19200	13148	16819	12051	16290	13314	12965	13531
O95696	1052	S	47093	44893	46829	40311.8	44430	51103	42133	45149
O95696	1055	S	50822	58823	60853	54656	59490	70867	54407	64336
O95714	2928	S	2378.1	2281.5	2056.7	2384	3092.5	2293	3200.8	1982.6
O95747	339	S	442930	346140	450290	276100	467840	275650	375640	195630
O95759	1035	S	1898.1	3090	2099.9	2392.2	3248.3	3031.8	2401.6	2108.6
O95772	210	S	51418	46956	36405	45266	36312	46314	49520	44925
O95772	214	S	28502	27126.8	17589.6	23708.8	18418.8	26842.9	28128	26923.3
O95772	218	S	81176	61249.1	55073	58901.6	59646	66590	73106	59653.9
O95772	39	S	10265	5500.4	6495.7	4459.1	6249.9	8008.2	7692.4	5764.5
O95782	652	S	11272.2	13463.6	12248.3	12151.9	11091.6	13143.5	12806.7	11345.6
O95782	655	S	37545.8	42559.8	39712.4	39549.2	37373.9	40442.5	45158.1	37722.9
O95782	518	S	12247	20334	11863	15458	13411	13002	13924	14823
O95785	1517	S	6637.3	7408.2	7288	7238.8	6776.8	9456.4	7409.2	6871.8
O95785	1309	S	3846.1	5231.4	4279.7	5632.6	5019.6	5783.5	6348.4	4893.7
O95785	983	S	4652.6	3570.5	4232.2	3792.2	6543.1	7006.9	5125.7	5054.7
O95785	1146	S	49173	32436	45764	33457	39499	46981	42228	39017
O95785	1151	S	17844	13426	22732	13771	19498	18070	19214	16246
O95785	1127	S	6437.2	9723.8	8446.4	8648.9	7616.9	11182	10721	16940
O95785	1129	S	6437.2	9723.8	8446.4	8648.9	7616.9	11182	10721	16940
O95786	855	S	9472.8	6657.3	7728.9	5967.2	11928	8130.3	20612	5813.3
O95793	278	S	7954.4	3681	14893	3378.4	10432	5736.3	12447	3788.3
O95810	364	S	6877.5	7434.3	6734.4	8311.9	5114.1	11317	6500.3	11332
O95810	25	S	8157.6	22452	8771.8	18531	8263.9	31816	8165.6	34769
O95810	27	S	41779	95182	51985	88265	55500	117527	43620	159835
O95810	31	S	23612.7	27294.4	26687.9	23881.9	22248	32135.6	20972.7	34022.2
O95810	32	S	58031	79103	60974	71432	62712	110956	56866	106639
O95810	35	S	40763.9	62445.3	42924.1	54697.1	43129.4	89220	40924.2	83246
O95810	287	S	8750.8	105480	17546	132500	24886	127380	0	208420
O95810	288	S	18079	189555	25696	207442	40045	238699	13220	380880
O95810	293	S	12239.6	119756	21698.8	145922	29936.9	144243	4266.9	230660
O95817	65	S	1507.8	1574.1	769.4	1773.4	1137.2	3345.4	1442.7	2176.1
O95817	171	S	5843.7	5317.8	4875.6	5161	5106.4	6556	5862.4	6010.1
O95817	173	S	38885	19592	24948	16706	9725.9	12947	10977	15747
O95817	289	S	24385	17864	19212	15760	20212	20979	18953	21940
O95817	377	S	91070	68213	66052	60115	66256	82825	69807	69598
O95817	385	S	65729	38910.1	43266.5	35441.9	38350.7	46847	39401.5	39201.2
O95817	386	S	15654.4	12503.5	9986.3	10853.9	7495	16682.3	7871.3	11725.6
O95819	639	S	3359.4	3070.6	2599.5	2826.4	3655.8	2290.6	5875.8	2347.2
O95819	629	S	739.35	528.23	685.71	694.7	575.47	524.53	1127.6	764.33
O95819	631	S	23433	27247	24340	29055	21811	33227	46493	34084
O95831	268	S	13510	6708.9	9594.8	7007.8	18148	11166	9765.3	6022.5
O95832	205	S	14385	26515	28985	20434	95123	46423	20928	29148
O95832	206	S	32978	65101	190415	70216	154281	98799	47430	54282
O95857	143	S	14985	8855	13558	9335	17342	15367	10756	11687
O95866	86	S	1390	1215.8	1581.5	1432.9	1373.1	2053.1	1777	1809.9
O95944	59	S	1178.4	7698.6	1450.4	3197.7	1688.5	3935.9	2221.9	6991.3
O95977	346	S	4432.6	2905.5	3940	4347.4	3677.8	4763.2	4481.7	4068.9
O95983	85	S	9630.1	10431	10277	10161	12417	13685	13940	13108
Q9NZH5	165	S	6495.6	2208.3	4935.8	2232.5	3014.7	3060.9	2624.7	3094.6
O95997	165	S	6495.6	2208.3	4935.8	2232.5	3014.7	3060.9	2624.7	3094.6
O95999	138	S	50980	29623	28654	39368	55034	24849	97057	28895
O96013	181	S	37028	25138	57688	24690	42539	30832	78268	25426
O96013	104	S	7502.5	6378.8	8285.8	6241.2	8112.9	7420.6	15799	6720.3
O96013	474	S	4372.6	4792.4	4772	3776.2	6617.7	5129.9	5469.2	4050.3
O96018	9	S	21590	18180	26013	17209	17763	23291	19244	18250
O96019	233	S	28191	11569	30382	12322	21541	14020	19661	9656.9
P07327	365	S	2720.6	6215.8	3217.7	5276.7	3600.6	9115.8	2940.6	11849
P00325	365	S	2720.6	6215.8	3217.7	5276.7	3600.6	9115.8	2940.6	11849
P00338	310	S	3155.5	3963.5	4065.7	3097.2	3665.1	5079.1	3303.8	5026.3
P00352	413	S	9738.1	28445	9902.9	26595	40682	52104	10167	111290
P49448	128	S	40855	28139	40060	28237	44776	39743	33342	29356
P00367	128	S	40855	28139	40060	28237	44776	39743	33342	29356
P00387	38	S	1641	2324.1	1808.3	2130.5	2016.9	2750.8	1514.7	2141.5
P00390	178	S	6636.9	10466	7861.8	12539	17705	23505	6889.7	17694
P00519	683	S	6598	4381.1	5514.3	4544.2	5341.5	4285.5	6064.4	4400.5
P00519	569	S	4222.6	4541	4554.5	3764.8	4013.4	3793.5	3948.4	3828.2
P00519	718	S	9095.6	10786	10164	11287	9964.8	12164	14385	12028
P00533	1166	S	5823.8	4325.4	6059.7	5023.4	5681.1	7088.3	7504.6	6755.9
P00533	991	S	23981	17494	24111	15353	23694	21790	22639	20389
P00558	203	S	1456400	111290	664970	262820	1043700	333470	796840	256820
P00568	178	S	7113.7	8882.8	5823.2	9135	8033.5	13590	7246.5	11600
P00747	68	S	12064	10864	14120	19968	11460	15252	13965	18666
Q02325	68	S	12064	10864	14120	19968	11460	15252	13965	18666
Q15195	68	S	12064	10864	14120	19968	11460	15252	13965	18666
P00747	477	S	40015	30869	33414	42349	20978	39219	39693	37418
P00747	358	S	7021.2	10052	6137.3	11712	5176.5	11345	12275	13908
P00747	83	S	8455	6041	7777.3	7827.9	8377.4	14989	11454	29390
Q02325	83	S	8455	6041	7777.3	7827.9	8377.4	14989	11454	29390
Q15195	83	S	8455	6041	7777.3	7827.9	8377.4	14989	11454	29390
P00747	45	S	13462	11025	13203	22638	11689	15355	15797	21656
P00747	741	S	49887	33055	39977	49665	25348	47041	45684	51832
P01008	68	S	95835	120720	96471	185650	69259	172300	134270	197860
P01024	1321	S	19762	9905.7	17002	13122	12445	16223	13083	11989
P01024	672	S	26553	23159	25333	20681	30521	54939	27539	24649
P01042	275	S	9900	11179	8584.2	16368	7963.6	13264	14458	14566
P01042	329	S	35860	34127	32484	77369	16269	44598	57280	63087
P01042	332	S	1201989	1.02023e+06	992693	1635733	673814	1324152	1413404	1548097
P01042	339	S	33908	27955	31477	50137	22274	38296	40302	43110
P01266	1684	S	6546.1	5840.6	7730.6	7220.7	6316.5	6419.8	8296.3	6050.8
P01833	673	S	2051.3	4471.2	3145.3	3831.8	4196.1	7006.4	2902.2	14235
P01833	734	S	18191	67464	23228	47597	111270	41765	23351	57615
P01833	735	S	17772	72685	21132	49612	120500	41948	22299	63049
P01833	682	S	15563	14246	14629	13054	14746	18917	12958	28383
P01889	343	S	5082.5	8612.5	13014	10421	9088.1	9797.8	11901	5654.6
P01889	352	S	55835	48119	66450	47414	61811	64631	59148	55815
P01889	356	S	45604	41178	46402	34016	44819	45924	50127	48772
P01889	359	S	62215	52147.4	64760	50355	64705	54623	63883	53992.6
P01893	343	S	13605	6439	8151	6385.6	8746	7955	10897	7395.4
P01893	345	S	6391.8	6462.6	6712.2	6056.6	6696.6	10909	7762.4	11032
P01893	352	S	78155	51567.2	55908	44288.5	69886	58515.9	79085	52403.9
P01893	356	S	48724.1	28932.4	28840.2	23451	35833.1	27907.9	55511	29582.7
P01893	359	S	50715	27543	29077	23155	35405	27504	41366	27279
P02042	51	S	13124	15680	8110.2	11481	6253.9	10486	8714.2	12440
P02511	59	S	18261	89101	21708	83647	35250	96503	23932	77535
P02511	19	S	17162	19043	13575	18190	14927	28625	15260	26084
P02511	21	S	18916	19774	14414	23863	22361	33432	23481	41238
P02545	404	S	6144.9	7880.9	7283.8	6940.6	5337.1	17314	10390	21874
P02545	406	S	6144.9	7880.9	7283.8	6940.6	5337.1	17314	10390	21874
P02545	22	S	17495	24352	25977	23961	17426	37430	32276	24450
P02545	153	S	2948.9	4650	3170.1	3977.7	3980.9	6340.3	3585.6	5858.5
P02545	301	S	33030	43824	54087	38539	43979	60763	48870	49402
P02545	423	S	169.7	667.8	146.73	347.75	515.37	2135.6	2150	2770.6
P02545	94	S	8876.9	9316.4	7590.5	7586.6	6504	11363	8959.9	9273.1
P02545	277	S	3102.5	4771.1	3537.9	4724.9	4828.8	6600.6	4765.7	5776.8
P02545	107	S	26542	22399	31144	21154	41414	29127	31198	22961
P02545	390	S	239619	208395	262344	197392	214663	264114	294097	231634
P02545	392	S	146929	96332	155193	91460	106716	116603	156676	100056
P02545	395	S	1052	1035	1688.5	996.3	956.98	1232.3	2008	881.98
P02545	212	S	2684.7	1921.9	2758.9	1712.7	2016.6	2060.6	2172.9	2295.3
P02545	458	S	163560	118690	173220	104510	244270	126580	182390	91061
P02545	463	S	110430	76554	109810	73609	132180	99980	104250	70189
P02545	429	S	873.7	1307.6	1441.9	898.49	1286.1	1386	2206.8	1546.8
P02545	632	S	6024.8	10792	8518.6	9285.1	6604.1	12608	9466.5	15751
P02545	636	S	9317	12435	13469	15546	9894.9	11898	14906	13066
P02545	568	S	14465.9	15833.3	16394.9	18581.4	15135.9	20986.5	21622	19567.1
P02545	571	S	4135.9	7429.2	6651.5	10730	7867.8	9125.5	10629	9273.1
P02545	572	S	4135.9	7429.2	6651.5	10730	7867.8	9125.5	10629	9273.1
P02545	652	S	7528.5	7735.8	19953	8646.7	9823.4	12314	13982	11340
P02545	533	S	6782.2	7487.4	7420.1	6535.9	8157.7	9606.4	6859.2	7498.7
P02549	1284	S	14404	13636	13509	17157	10537	16016	14022	13510
P02647	191	S	17240	9976.8	16158	10685	14358	14031	15692	10998
P02649	147	S	4963	4077.6	6084.9	4075.3	4537.9	5708.5	5002.8	4688.6
P02652	68	S	43051	95672	30424	205690	30636	164790	100760	283400
P02652	54	S	3376.5	4237.2	2567.1	7190.9	1625.1	6535.3	5210.1	6805.3
P02671	485	S	44796	51077	62194	103340	32342	63695	55043	62306
P02671	274	S	5371.6	5862.9	6464.5	5426	6631.3	7492.2	7165.1	5770.6
P02671	281	S	4902.1	5448.6	13680	11349	4419.2	9907.3	11508	12699
P02671	524	S	9766	10029	9835.9	20664	12544	14599	12608	13117
P02671	364	S	312120	295020	297880	618320	256420	844150	339730	385280
P02686	16	S	15649	18525	11289	22003	16478	27216	24460	27117
P02686	19	S	15649	18525	11289	22003	16478	27216	24460	27117
P02686	40	S	38834	53372	34879	78670	43889	55000	66842	59348
P02724	139	S	8488.7	20820	7577.3	18805	6961.8	11805	12686	14914
P02724	148	S	6503.4	10120	6441.1	8558	8243.4	8110.6	8317	7509.8
P02730	356	S	33755	46816	23454	55356	21662	33416	39187	42729
P02730	357	S	39936	76859	28069	78734	25354.5	46375	53597	67629
P02730	350	S	46397	61184	21835.3	46248	16854.9	26440	34798	35816
P02751	2475	S	452670	389420	370210	323840	210410	487530	292560	355350
P02765	138	S	689320	694740	624020	987450	457420	919610	832070	978770
P02765	328	S	46238	41403	50648	64126	31282	41492	57762	43819
P02765	330	S	67064	61584	58617	81585	58646	76102	68516	74865
P02794	179	S	155823	185278	162261	128754	145248	176344	177042	183291
P02794	183	S	3103.2	3058.4	3571.4	3084	3147.9	3813.8	3432.5	3620.9
P02794	114	S	15357	20362	11635	20023	16781	34395	25683	21727
P04049	43	S	8999.9	7289	7908.5	7906.5	10719	10836	10775	10897
P04049	259	S	45104	19709	27635	17658	28421	18472	24693	17579
P04049	233	S	11769	8068	12195	7702	9918.2	8374.3	9946.8	9210.3
P04075	36	S	77476	54468	54926	47464	53941	68600	48324	70710
P04075	39	S	249.96	242.1	225.34	0	283.08	390.24	128.15	261.28
P04075	46	S	51407	41138	46139	36971	56709	56815	54493	46973
P04075	100	S	10720	8068.3	8693.1	5529.4	11542	7828.1	7487.5	10608
P04083	173	S	25036	11838	24072	11618	15514	17699	19131	28863
P04083	34	S	10247	5545.2	7975.4	5402.5	8980	8412.8	8123.7	9520.4
P04083	37	S	19019	11838	17988	11933	18953	17883	16681	20469
P04114	4048	S	32003	38494	38545	102340	30022	92568	70597	69044
P04150	266	S	13881	13784	14845	13824	18818	17143	18451	13402
P04150	134	S	22965	23497	25427	28166	28159	42765	36281	49779
P04183	13	S	118560	35353	135050	32333	69737	40665	58768	31633
P04233	8	S	5127.4	4360.4	8202.7	8027	24564	10028	20502	8702.3
P04406	83	S	63535	38676	56927	33800	90612	46926	67869	42640
P04406	333	S	11473	17402	17911	14277	18162	27020	19483	38203
P04439	343	S	13100	11535	25682	14216	14398	13355	69604	25871
P04439	350	S	1924.1	1603.7	5890.5	3887.8	2649.3	2245.9	10685	5751.9
P04439	352	S	35172.9	26803.6	61520.5	43491	29390.5	33086.2	124261	54411.8
P04439	356	S	66619.7	48814.6	116802	78679.6	72926.3	76849.9	263729	135429
P04439	359	S	50574.7	38056.6	80551.4	63350.6	56542.3	68368.9	176129	106870
P04626	1107	S	12019	11892	12992	10745	17285	14210	28715	12832
P04626	1054	S	5774	6163.7	5894	6118.1	5681.7	7442.8	6083.4	6329.1
P04626	1083	S	8320.7	10819	11728	10516	11690	18745	17164	12838
P04626	1174	S	26644	34722	29597	28560	40228	48573	96091	31607
P04637	315	S	20155	11036	24133	11353	23957	16552	33574	12701
P04792	82	S	149496	214365	129340	164586	132850	245882	123454	233252
P04792	83	S	165316	266585	162930	219486	160100	329102	147754	304322
P04792	199	S	6526.4	3610	5960.9	3667.3	4923.8	3513.8	4093.5	4178.8
P04792	15	S	95659	271430	113170	180550	130810	231380	136460	188160
P04792	158	S	5188.7	7713.7	5397.5	6952.3	4276.2	7404.2	4959.3	6381.2
P04792	176	S	5950.2	6242.2	5285.2	5549.6	5251.3	4827.2	5756.8	6307.7
P04792	65	S	28622	37531	31257	35360	38937	45556	32651	43463
P04920	443	S	13579	13188	14453	13379	18037	15836	13685	13208
P04920	113	S	8830.9	7446.6	8772	6872.1	9584.4	9844.8	7368	6902
P04920	173	S	950.21	1859.5	935.92	1740.2	1403	1866.5	1464.9	1567.8
P04921	104	S	12198	10312	11269	10809	10320	16882	10446	14198
P05023	16	S	65399	35239	56474	35443	62577	50457	52304	37320
P05023	47	S	5880.6	4816.3	5810.4	4747.9	9536.5	7380.3	5501.8	5996
P05023	217	S	5989.2	5688.2	5727.3	5739.7	11345	8240.3	6264.2	6756.8
P13637	207	S	5989.2	5688.2	5727.3	5739.7	11345	8240.3	6264.2	6756.8
P50993	215	S	5989.2	5688.2	5727.3	5739.7	11345	8240.3	6264.2	6756.8
P20648	228	S	5989.2	5688.2	5727.3	5739.7	11345	8240.3	6264.2	6756.8
P05060	405	S	6486.6	4621.4	7609.9	4029.7	4915.3	8656.7	5792.9	7451.7
P05114	89	S	9343.7	8891.9	9365.3	8761.1	9927.5	12382	12733	9699.2
P12236	42	S	4910.8	3369.9	4072.7	2586.7	5419.2	4126.8	3278.5	3553.2
P12235	42	S	4910.8	3369.9	4072.7	2586.7	5419.2	4126.8	3278.5	3553.2
P05141	42	S	4910.8	3369.9	4072.7	2586.7	5419.2	4126.8	3278.5	3553.2
P05162	77	S	6055.2	6552.8	6280.8	5966.4	7708.7	15960	5969.9	8866.5
P05186	110	S	8762.2	7897.3	6997.3	7347.8	7722.6	8491	8177.7	8733.2
P10696	111	S	3746.5	2471.3	34334	2644.1	5177.9	3523.5	19764	2637.1
P05187	114	S	3746.5	2471.3	34334	2644.1	5177.9	3523.5	19764	2637.1
P05204	29	S	8049.7	7154.7	8526.9	8263.1	8101.7	21579	9137	65548
Q15651	31	S	8049.7	7154.7	8526.9	8263.1	8101.7	21579	9137	65548
P05387	102	S	157608	689245	143028	621029	201904	201999	749303	301426
P05386	101	S	157608	689245	143028	621029	201904	201999	749303	301426
P05387	105	S	178945	775150	160451	669861	270090	236417	871470	357369
P05386	104	S	178945	775150	160451	669861	270090	236417	871470	357369
P05387	79	S	37236	31510	39442	30982	38988	36910	41428	32968
P05387	86	S	7101.1	4255.2	6313.8	3847.1	7774.1	5451.9	5278.1	4381.1
Q8NHW5	304	S	19692.2	45870	17366.7	39916	30232.2	23965.5	59455	29110
P05388	304	S	19692.2	45870	17366.7	39916	30232.2	23965.5	59455	29110
Q8NHW5	307	S	29502.2	57133	21734.7	46621	38586.2	29240.5	74346	36922
P05388	307	S	29502.2	57133	21734.7	46621	38586.2	29240.5	74346	36922
P05455	366	S	105830	205980	118780	240990	183230	143220	303190	180390
P05455	92	S	55012	10793	60644	11580	26044	15550	28296	16731
P05783	398	S	9937.6	29761	9202.4	14185	51942	35670	14712	26180
P05783	42	S	13895	10333	15346	13129	28647	14373	15191	11098
P05783	177	S	7835.4	6066.7	7641.5	5965.5	9249.9	8167.6	10143	7789.5
P05783	100	S	633.48	1641.1	1980.1	1355.5	8639.9	2056.8	1379.1	1321.2
P06241	21	S	2323.5	3662.3	2323.3	5563.9	4779.5	8599.8	4279.9	5606.2
P06400	795	S	4577	2323.4	7220.4	2899	4276.6	3615.2	4658.4	4255.5
P06400	37	S	29753	22257	29358	24793	26730	28640	29996	24748
P06400	866	S	20103	19140	20189	18412	15381	16900	26451	10997
P06400	249	S	21388	11623	22334	12077	17656	14041	19482	11450
P06454	2	S	23066	24699	25043	21951	26820	36207	33588	43186
P06703	46	S	28509	24170	20986	15300	30736	22259	40456	21393
P06727	259	S	14706	15075	12240	17091	9957.3	21780	15145	13973
P06729	347	S	27664.7	30592	29039	33189	25515.1	46972	27508	34924
P06729	350	S	18118	19134	18573	18230	16528	26422	16722	19086
P06730	24	S	10137	3272.3	4029.8	4288.5	3233.5	4903.3	3781.7	3972.7
P06733	141	S	17367	12529	14745	10917	13861	14639	13547	13525
P06733	419	S	42901	24234	38303	21962	44632	35556	30850	22049
P06733	254	S	63851	32667	42761	29829	35725	62260	28116	53268
P06733	79	S	13382	14942	13537	14867	13581	17690	11469	17945
P06733	263	S	41001	10358	22074	8681.5	21839	12439	19495	9268.4
P06733	272	S	8395.2	5867.4	7282.9	4122.8	8391.4	6293.2	7197.4	5589.7
P06744	455	S	53904	23972	40790	22582	42871	27926	38115	25464
P06748	125	S	617240	387570	584960	354840	418670	370560	496590	388050
P06748	70	S	29508	7691	16148	6525.5	9741.9	7674.7	11029	7728.6
P06748	243	S	52894	17540	41492	15768	26918	15253	29100	14450
P06748	227	S	109040	30174	42171	36806	34858	48069	68331	39376
P06748	4	S	1017500	215280	691530	211690	512930	250510	511320	237320
P06748	10	S	352390	122120	255720	123320	167540	149320	177560	151560
P06748	254	S	17346	1860.4	7144.7	1508.2	2841.3	1639.4	5173.8	1215.8
P06748	222	S	30831	14537	16078	13873	14468	15615	23650	14212
P06756	1046	S	41712	43712	32028	36902	29670	33321	34584	28334
P07197	680	S	8910.1	18441	8658.7	21442	13999	56969	11886	128340
P07197	685	S	8910.1	18441	8658.7	21442	13999	56969	11886	128340
P07197	615	S	5509.6	7997.8	5329.8	8997.7	5482.8	18215	5745.6	36838
P07197	620	S	5509.6	7997.8	5329.8	8997.7	5482.8	18215	5745.6	36838
P07197	628	S	14573	23480	13485	29687	16256	79743	9879.8	183820
P07197	633	S	14573	23480	13485	29687	16256	79743	9879.8	183820
P07197	667	S	13032.2	27871.5	13751.2	27420.8	15792.3	68417	14361.6	124780
P07197	670	S	3925.9	9380.5	3632.2	7373.8	4235.3	11865	3480.6	14610
P07197	672	S	13032.2	27871.5	13751.2	27420.8	15792.3	68417	14361.6	124780
P07197	837	S	27394	33176	23722	34181	24332	59240	27675	127120
P07197	736	S	32684	24538	26896	27445	29297	47130	18046	100800
P07199	156	S	17077	9888.7	24511	10104	14538	14299	12135	11091
P07355	184	S	36372	25586	32247	22865	27862	34537	27955	31438
P07355	161	S	24059	17145	21394	14457	19090	23418	18717	17227
A6NMY6	161	S	24059	17145	21394	14457	19090	23418	18717	17227
P07355	127	S	37152	10311	10463	7534	10047	11272	8007.6	9121
A6NMY6	127	S	37152	10311	10463	7534	10047	11272	8007.6	9121
P07355	12	S	7853.2	1460.2	3828.7	2234.9	3819.2	2349.7	2434.6	1458.9
A6NMY6	12	S	7853.2	1460.2	3828.7	2234.9	3819.2	2349.7	2434.6	1458.9
P07355	26	S	23802	20225	19733	21113	23836	22390	20672	24406
A6NMY6	26	S	23802	20225	19733	21113	23836	22390	20672	24406
P07355	2	S	3546.8	3578.3	2670.3	3380	3615.8	3279.6	4152.6	3527.5
A6NMY6	2	S	3546.8	3578.3	2670.3	3380	3615.8	3279.6	4152.6	3527.5
P07737	57	S	25705	14032	15970	12638	18268	16790	14928	12950
P07741	66	S	3988.3	2284.1	2817.9	2883.8	2901.7	3490.3	2186	2892
P07814	747	S	4308	3508.8	3578.4	2643.3	3284.3	3429.2	3143.5	2693.5
P07814	882	S	14142	11616	19122	10135	14791	11895	14230	10806
P07814	885	S	17717.2	17944.4	20313.1	16167	19125.7	15546	21117.5	15582.3
P07814	886	S	67887	61901.7	69493.4	59879.9	63356.3	72208.6	74984.6	84046.9
P07814	954	S	6050.1	7079.3	7041.5	5624.3	10194	9540.6	17055	6821.6
P07900	231	S	136250	57268	126370	56850	107800	97935	103050	62842
P07900	263	S	992590	508690	983630	458640	837490	635830	767420	438250
P07900	453	S	1747.6	1450.2	1911.2	1462.5	2736.6	2507.8	1953.4	2208.6
P07900	476	S	26845	16959	23711	17987	33135	23040	24828	17503
P07910	299	S	12881	106000	19001	100130	63833	60898	138360	71875
P07910	253	S	4554.7	5438.5	4531.8	5662.8	5078.7	6486.1	6767	5769.7
P07910	260	S	123735	102892	107582	113993	119479	111866	137587	110460
P07910	233	S	129680	213360	122800	228310	228320	290370	286570	212680
P07910	238	S	5368	16900	5248.2	13423	10821	14000	22645	12283
P07910	239	S	4224	8316	3496.7	8071.2	8545.6	10702	12556	9104.2
P07910	240	S	1757.4	3543.8	1449.1	3101.2	2482.1	5213.2	3780.8	3583.5
P07910	241	S	19493	44453	17356	42772	44610	57355	58778	49045
P07947	40	S	3568.8	7399.7	4888.7	5933.2	4890.7	5591	8024.4	6196.2
P07948	11	S	34152.3	26410.8	29090.2	29203.6	29384.5	47357.6	28689	37849.8
P07948	13	S	68879	69834	69675	79584	65986	130670	67760	93851
P08034	266	S	2454	6381.9	4614.3	5705.2	11886	6569.7	3370.8	5116.9
P08047	7	S	11578	11854	12828	12603	12975	14610	13447	14047
P08047	59	S	17221.7	16745.6	16523.3	15520.1	15820.9	21151.1	16748.3	18820
P08048	270	S	5920.8	5575.7	6537.7	5786.2	5604	7170.1	6236.8	6136.3
P17010	274	S	5920.8	5575.7	6537.7	5786.2	5604	7170.1	6236.8	6136.3
P08138	425	S	11043	17619	11617	16785	10463	17599	13679	15814
P08138	305	S	3166.3	4711.3	3614	4693.4	3429.5	4194	3003.2	3575.1
P08138	308	S	10204	19327.3	9554.9	16933.4	12417.9	14427	10747.5	14009.1
P08138	311	S	15767.3	33560.3	15581	33516.4	19246.5	25806	18315.2	22840.1
P08138	313	S	27363.8	51173.3	23753.9	57795.4	26547.8	40599	24253.8	37337.7
P08151	640	S	2467.5	3704.4	2791.2	2837.8	2738.1	3934.3	3468	3276.5
P08238	532	S	152380	20753	52668	16502	23487	19933	28355	19019
Q58FF8	305	S	152380	20753	52668	16502	23487	19933	28355	19019
Q58FF7	405	S	152380	20753	52668	16502	23487	19933	28355	19019
P08238	226	S	372270	93931	282730	86028	213580	120160	168240	84802
Q58FF7	205	S	372270	93931	282730	86028	213580	120160	168240	84802
P08238	255	S	6132300	1667814	4194560	1519665	3537980	1876360	2620270	1386654
Q58FF8	177	S	6132300	1667814	4194560	1519665	3537980	1876360	2620270	1386654
P08238	261	S	282900	96314	209960	91365	166580	120560	126670	91854
Q58FF8	183	S	282900	96314	209960	91365	166580	120560	126670	91854
P08240	296	S	200330	81333	185556	74519	196190	93434	133690	72784
P08240	297	S	232420	93823	215246	84806	228140	109553	153136	82897
P08240	298	S	275161	115207	260344	108224	353460	139195	218265	108615
P08263	37	S	8862.7	14070	8279.5	9659.5	35278	14908	9151.6	11894
P09210	37	S	8862.7	14070	8279.5	9659.5	35278	14908	9151.6	11894
P08263	202	S	23263	40284	22914	27135	129530	42156	28932	42104
P09210	202	S	23263	40284	22914	27135	129530	42156	28932	42104
Q16772	202	S	23263	40284	22914	27135	129530	42156	28932	42104
P08397	15	S	5482.6	2803	6198.1	2906.3	5077.4	3934.5	4680.8	2524.6
P08473	4	S	115110	27901	71622	21138	52068	56096	215340	38151
P08473	6	S	62657	19300	26871	13683	19799	37864	63032	32692
P08559	232	S	12808	6083.8	9258.5	6831.4	14811	12505	11658	12464
P08559	293	S	15719	11310	11959	12790	21113	28186	18168	29917
P29803	291	S	15719	11310	11959	12790	21113	28186	18168	29917
P08559	295	S	5179.6	4064.6	3935.6	4436.8	8563.7	13792	6012.3	17559
P29803	293	S	5179.6	4064.6	3935.6	4436.8	8563.7	13792	6012.3	17559
P08575	1299	S	3228.7	4033.4	3700	5329.7	2336.6	6115.1	2995	5319.4
P08575	1001	S	500440	60060.3	136882	83685	117336	106376	107338	74697
P08575	1004	S	185870	51932	83328	69659	85959	87433	65270	60167
P08575	1005	S	124714	44096.5	67340.8	61509.6	73773.7	74792.6	50762.3	50065
P08575	1009	S	522317	54654.3	131005	77453.1	102616	97629.2	100742	69761.4
P08575	975	S	306480	193200	267510	224000	287930	277740	233490	234080
P08581	990	S	18795	15265	18527	16025	19735	21367	20560	18625
P08621	226	S	10234	8240.8	7312.4	14595	9782.3	9382.9	19006	9485.4
P08648	127	S	139780	95655	61504	81857	43437	52917	86164	55314
P08651	322	S	25720	39530	31930	52824	27866	42284	32494	37011
P08651	323	S	5503.1	7691.2	6570	9653.8	6835.4	8017.1	6397.7	6629.5
P08651	339	S	23303	12461	15877	17282	18173	11309	18257	14773
P08670	205	S	39278	17597	21100	17592	14834	22860	18285	17203
P08670	214	S	35869	17532	13964	13788	12230	14836	15795	15096
P08670	430	S	76089	49573	43041	50016	52565	64460	56177	68486
P08670	438	S	2956.7	2198.8	2152.8	1902.4	2339.1	2311.3	3054.3	2309.7
P08670	299	S	32295	21447	17847	17382	17090	21836	18864	19131
P08670	420	S	145530	82729	25262	71504	33111	181550	57434	161320
P08670	226	S	33047	20910	13980	18034	15432	17689	12958	19898
P08670	72	S	2497.1	1978.4	2257.2	1617.7	2615.3	2436.3	2591.5	3279.8
P08670	73	S	4261.6	4010	4013	4489.1	3992.7	11521	6061.7	29600
P08670	325	S	25357	25435	20479	21797	23149	26001	21040	20567
P08670	51	S	26802	10207	18224	10592	12712	12855	13527	12208
P08670	39	S	6863	2285.4	2613.8	2169.9	2071.2	2827.3	3619.5	4931.4
P20815	134	S	2075.6	1396.1	1969.8	936.57	1937.5	2138.2	2307.7	1477.2
P24462	134	S	2075.6	1396.1	1969.8	936.57	1937.5	2138.2	2307.7	1477.2
P08684	134	S	2075.6	1396.1	1969.8	936.57	1937.5	2138.2	2307.7	1477.2
P08754	206	S	15949	9897.7	14414	11121	16022	13257	15018	11287
P11488	202	S	15949	9897.7	14414	11121	16022	13257	15018	11287
P63096	206	S	15949	9897.7	14414	11121	16022	13257	15018	11287
P19087	206	S	15949	9897.7	14414	11121	16022	13257	15018	11287
A8MTJ3	206	S	15949	9897.7	14414	11121	16022	13257	15018	11287
P04899	207	S	15949	9897.7	14414	11121	16022	13257	15018	11287
P08833	194	S	27194	38009	27139	33821	26318	69368	44996	48067
P08865	43	S	10383	10295	11247	9442.4	9314.7	12687	7669.1	11546
P08910	415	S	20147	19202	23230	20433	19698	28372	23029	24405
P08913	346	S	27457	30090	24240	37235	27249	40529	26021	31482
P09104	263	S	17232	6207.1	7998.5	4479.9	7010.4	7378.9	9756	6089
P09493	174	S	6091.4	23185	10052	16288	8080.4	29057	7854.2	29170
P09493	206	S	5115.9	11217	7101.9	11024	6628.5	17429	6760.6	15968
P09493	215	S	37448	112080	48634	81991	41931	130820	41073	84138
P09496	105	S	9289.4	3834.3	5960.5	3267.7	5156.1	6932.1	4472.8	3949.5
P09525	12	S	29941	33581	30083	34590	69693	51171	35270	36342
P09525	58	S	5557.3	7699.9	5245.4	6633.4	13338	10403	6987.7	7278.5
P09543	170	S	47330	26794	21090	25510	44677	22502	55769	23675
P09603	533	S	25866	20094	23032	19225	27395	27245	21375	26242
P09651	4	S	121935	89366	172096	82080	153892	100592	104338	71736
P09651	6	S	582446	430007	733692	387085	665966	498164	512333	391249
P09651	2	S	44591	41605	75051	39458	62851	41914	38600	31226
P09874	75	S	3364.5	3738.2	3957.1	3168.1	3547.1	4465.3	3644.3	3446.6
P09914	2	S	9528.9	7796.1	6564.3	8199	8930.1	9707.9	23201	9213.1
P09972	39	S	6043.6	5612.3	4989.7	4556.7	5765.4	7642.8	5082.8	6691.4
P09972	45	S	12972	6759	12583	6417	9615.6	8981.7	7383.4	7120.8
P0C1Z6	252	S	33816	13643	28742	14300	26953	19779	22734	17537
P0C1Z6	180	S	4861.6	3652.7	4214	4361.5	4559.7	4552.2	5144.1	6308
P47985	99	S	7478.2	5011.1	6785.3	5137.2	11748	6128.7	5596.6	5841.2
P0C7P4	108	S	7478.2	5011.1	6785.3	5137.2	11748	6128.7	5596.6	5841.2
P0C7T5	361	S	1920.2	1893.9	2272.6	1596.5	2371.4	2292.7	2426.4	1837.2
P0C7T5	615	S	5919.5	7499.2	8473	8239.7	7497.7	8576.7	9295.3	8149.1
P0CG38	733	S	1661.4	1154.2	1533.9	854.91	1440.8	1514.2	1454	954.89
P60709	33	S	1661.4	1154.2	1533.9	854.91	1440.8	1514.2	1454	954.89
P63261	33	S	1661.4	1154.2	1533.9	854.91	1440.8	1514.2	1454	954.89
Q6S8J3	733	S	1661.4	1154.2	1533.9	854.91	1440.8	1514.2	1454	954.89
A5A3E0	733	S	1661.4	1154.2	1533.9	854.91	1440.8	1514.2	1454	954.89
Q9BYX7	33	S	1661.4	1154.2	1533.9	854.91	1440.8	1514.2	1454	954.89
P63267	34	S	1661.4	1154.2	1533.9	854.91	1440.8	1514.2	1454	954.89
P68133	35	S	1661.4	1154.2	1533.9	854.91	1440.8	1514.2	1454	954.89
P68032	35	S	1661.4	1154.2	1533.9	854.91	1440.8	1514.2	1454	954.89
P62736	35	S	1661.4	1154.2	1533.9	854.91	1440.8	1514.2	1454	954.89
P62987	65	S	120190	22104	23232	10691	11080	10784	18169	8162.8
P62979	65	S	120190	22104	23232	10691	11080	10784	18169	8162.8
P0CG47	65	S	120190	22104	23232	10691	11080	10784	18169	8162.8
P0CG48	65	S	120190	22104	23232	10691	11080	10784	18169	8162.8
P62987	57	S	457200	201080	198470	173960	190740	201110	176730	174300
P62979	57	S	457200	201080	198470	173960	190740	201110	176730	174300
P0CG47	57	S	457200	201080	198470	173960	190740	201110	176730	174300
P0CG48	57	S	457200	201080	198470	173960	190740	201110	176730	174300
P0DJ93	58	S	21373	20298	25047	21711	22540	26001	22482	22058
P0DJ93	60	S	21373	20298	25047	21711	22540	26001	22482	22058
P0DMV9	631	S	22082	15555	20446	15759	17160	21427	17680	24158
P0DMV8	631	S	22082	15555	20446	15759	17160	21427	17680	24158
P0DP25	82	S	13779	6974.4	10544	8049.7	9751.5	10203	10413	11108
P0DP24	82	S	13779	6974.4	10544	8049.7	9751.5	10203	10413	11108
P0DP23	82	S	13779	6974.4	10544	8049.7	9751.5	10203	10413	11108
P0DP25	102	S	143860	89932	80900	57898	135460	91869	84702	93742
P0DP24	102	S	143860	89932	80900	57898	135460	91869	84702	93742
P0DP23	102	S	143860	89932	80900	57898	135460	91869	84702	93742
P0DP42	45	S	2896.7	527.42	4783	539.25	1492.5	2913.7	381.39	1417.1
P0DP42	51	S	2896.7	527.42	4783	539.25	1492.5	2913.7	381.39	1417.1
P10071	445	S	6775.5	5937.3	6827.6	5671.5	4612	6602.5	7737.5	8468.2
P10074	169	S	5610.4	3906.8	6728.9	4335.7	7226	6036.9	5848.9	5623
P10074	171	S	19222	13573	17863	14344	23340	16280	19140	15256
P10301	201	S	38829	30172	40995	27973	42555	41155	38752	31106
P10321	353	S	4567.8	3323.5	11454	6766.3	6258.6	4341	4907.5	3550
P10321	357	S	5126.5	5127.9	29713	11183	9079.2	7045.9	6431.4	6393.6
P10398	257	S	22949	20477	25894	21047	28062	24280	41586	23438
P10398	186	S	15620	10384	12672	10241	15492	11670	15333	11115
P10412	36	S	242490	186940	99938	173890	148380	833060	67326	1707500
P16402	37	S	242490	186940	99938	173890	148380	833060	67326	1707500
P16403	36	S	242490	186940	99938	173890	148380	833060	67326	1707500
P10412	102	S	6609	3623.7	4076.1	5642.8	3106.6	12353	5234.6	9572.8
P16401	105	S	6609	3623.7	4076.1	5642.8	3106.6	12353	5234.6	9572.8
P22492	106	S	6609	3623.7	4076.1	5642.8	3106.6	12353	5234.6	9572.8
Q02539	105	S	6609	3623.7	4076.1	5642.8	3106.6	12353	5234.6	9572.8
P16402	103	S	6609	3623.7	4076.1	5642.8	3106.6	12353	5234.6	9572.8
P16403	102	S	6609	3623.7	4076.1	5642.8	3106.6	12353	5234.6	9572.8
P10451	219	S	57055	54591	28291	25160	30513	41957	38703	29010
P10451	254	S	284772	327977	202397	236190	254268	341037	190202	191532
P10451	258	S	31212.8	32469	21637.9	22976.5	24598.2	32090.6	19573.4	25311.1
P10451	263	S	170416	190389	118534	125224	135540	187831	114732	118407
P10451	267	S	15853	22338	13711	18981	14017	20029	18037	14444
P10451	270	S	28517	33585	17597	21539.2	18655.4	30816	20101.6	26181.5
P10451	224	S	51126	110427	37872	69513	59116	75853	50042	64656
P10451	228	S	3324.9	7043.1	1982.4	3620.8	3707.2	4983.1	3097.6	3664.6
P10451	234	S	102883	178340	80470	123751	118638	168557	101511	122041
P10451	275	S	71910	91847	53799	64243	70586	102430	52901	62622
P10451	280	S	121496	124472	90848	91492	114144	143407	87530	93270
P10451	303	S	71137	94875	64592	62136	73848	89994	70546	83966
P10451	308	S	13379	29101	13475	21214	13366	25345	14728	34403
P10451	310	S	61346	93012	59556	72654.1	74127	92911	66309	95560.2
P10451	311	S	48698	69716	45449	54595	53093	70793	49871	74634
P10451	24	S	44620	130250	37388	50946	40814	62837	64467	69527
P10451	26	S	44620	130250	37388	50946	40814	62837	64467	69527
P10451	27	S	44620	130250	37388	50946	40814	62837	64467	69527
P10451	62	S	122512	261324	109028	138785	160668	220848	130478	150180
P10451	63	S	100212	260404	93757	132129	162623	201807	120224	137754
P10451	195	S	42697	91847	31163.4	54820.5	36813	51397.5	34965.8	51830.5
P10523	203	S	7880.1	11585	10625	15687	15320	19047	24186	17450
P10523	212	S	7880.1	11585	10625	15687	15320	19047	24186	17450
P10588	34	S	4221.9	4893.5	6347	4383.5	6764.5	5451.6	7011.4	4398.8
P10636	411	S	3172	3307.8	3835.6	2693.3	7671	6774.1	7151.3	6829
P10636	713	S	41143.4	36590.9	37458.6	45621.9	43284.7	70817.3	43499.1	82538
P10636	717	S	10491	9743.6	9961.2	11171	10776	23584	12722	28023
P10636	721	S	9164	10124.3	8964.5	12991.9	15688.5	26053.8	14259	32889
P10644	83	S	162908	156929	141179	146017	138678	173075	141263	138861
P10644	14	S	13038	13638	9921.1	10918	11038	13432	9036.1	10765
P10644	77	S	39909.2	52711.5	33899.3	49758.1	40072	59895.9	41589.6	42369.5
P10645	322	S	7180.3	11611	16723	30527	31888	29626	14729	20784
P10721	746	S	4516.9	5299.3	4784.6	6572.2	4919.9	8902.3	5044.2	17265
P10721	590	S	3140.2	4505	3896.2	4521.5	2486.5	8063.9	2578	14529
P10809	70	S	35941	6109.9	14030	4715.8	21781	5713.8	9443.6	4628.2
P10909	396	S	17841	16463	15917	22849	15081	23455	21605	20001
P11137	1347	S	24430	16437	14991	16198	14419	19626	18437	18143
P11137	1353	S	24430	16437	14991	16198	14419	19626	18437	18143
P11137	653	S	3617.1	4305.9	2917	4345.8	2797.3	6069.2	3111.5	6313.6
P11137	1155	S	36677	14720	14367	13869	17292	19141	15301	15965
P11137	833	S	10461	3298.2	4511.4	2723	4788.6	5977.9	3261.7	4361.5
P11137	1324	S	40390	18563	14128	19013	17363	22003	20604	20274
P11137	1539	S	4965	4911.8	4914.2	5153.9	5655.3	9561.7	5980.5	8379
P11137	1653	S	11951	8394	6936.1	8205	16039	14263	10422	12918
P11137	1782	S	13145.1	11738.3	9839	12375.6	8998.7	13654.6	12138.7	15922.7
P11137	1787	S	9544.6	9023.9	6060.7	8961.4	5891.7	8995.9	8676.7	12096
P11137	1790	S	9544.6	9023.9	6060.7	8961.4	5891.7	8995.9	8676.7	12096
P11166	473	S	36413	19833	52097	19290	23711	19195	70549	21932
P11166	490	S	5498	3858.6	5161.8	3521.6	5157.8	4637.3	4806	3701.9
P11169	485	S	5252.2	4160.2	4448.2	3451.9	4361.1	4779.1	7771.8	3522.4
P11171	684	S	11427	10478	8431.7	10882	9127.6	16529	18967	21298
P11171	188	S	6610.3	5852.1	7282.5	6522.6	9399.8	8038.6	7904.5	5928.1
P11171	709	S	2920.1	2698.8	2990.6	3605	3657.3	6378	3777.1	8437.8
P11171	542	S	12970	19109	10807	19144	16116	13465	16461	19585
P11171	555	S	24905	32329	20884	41557	51194	39394	24695	38633
P11171	95	S	16896	14030	19658	26857	19315	30368	17872	26327
P11234	10	S	18741	9405.8	9782.8	10682	9853.5	10788	13109	10665
P11274	122	S	39931	31045	52108	31205	50025	34251	38690	26093
P11274	459	S	6710.3	4025.9	4863.1	4183.4	6246.8	4426.9	5421.7	4192.4
P11277	998	S	3035.7	4332.1	2109.5	4236.2	1266.8	3696.9	2129.2	3573.3
P11277	2123	S	2235.7	3942.9	1834.3	3715.7	1974.1	2364.1	2983.2	2849.6
P11277	2125	S	2235.7	3942.9	1834.3	3715.7	1974.1	2364.1	2983.2	2849.6
P11277	2114	S	9939.1	16281	4216.8	12203	5212.5	7006.1	10161	7628.1
P11388	1247	S	169040	43195	139450	39849	103500	48848	226170	43434
P11388	1213	S	33763	14953	27335	13304	23701	16224	35432	13533
P11388	1106	S	250190	54413	252240	63704	120250	59423	187080	55051
P11474	19	S	3730.7	3140.3	3766	2538.7	4316.3	3922.7	3554.5	3462.3
P11474	22	S	3730.7	3140.3	3766	2538.7	4316.3	3922.7	3554.5	3462.3
P11474	26	S	3730.7	3140.3	3766	2538.7	4316.3	3922.7	3554.5	3462.3
P11532	3549	S	6188	6791.1	5973.9	5778.8	8563.7	9699.1	7421.6	8120.3
P11532	3621	S	13529	9823.3	12591	9248.8	13435	16877	10075	22969
P11532	3623	S	13529	9823.3	12591	9248.8	13435	16877	10075	22969
P11532	3624	S	17939	17172	24235	14293	19777	25012	14875	39909
P11532	3613	S	30655	36415	25830	27723	26300	34382	26819	33973
P11717	2409	S	93335	83834	51860	66735	60596	46598	106470	53877
P11717	2484	S	7111.8	14071	8859.9	9598.3	12996	6411.8	19952	6089.9
P11766	351	S	1735.4	1549.1	1520.4	1515.1	1515.4	2034.8	1554	1819.2
P11831	224	S	26276	16751	26917	18278	24618	24835	18279	20008
P11836	35	S	30283	22728.3	31844	53803	60538	93061	31308	80361
P11836	36	S	15507.3	13221.5	19033.1	33537.2	30627	67723.8	14824.4	59283.9
P11836	7	S	21952.7	18225.7	23308.6	28160	25908.6	33527.2	24260.1	31749.7
P12036	782	S	14073	20188	15019	21173	15214	53823	15986	85879
P12036	526	S	7819.8	11922	8521.5	12170	8979.5	27937	9163.9	24105
P12036	620	S	9096	18515	15835	22727	10239	44662	13215	48029
P12036	540	S	2804.6	5017	4543.1	4394.8	4774.4	11363	4532.3	9942.7
P12036	560	S	5813	8600.8	5363	8371.5	6363.2	24639	5212	22097
P12036	769	S	18899	17684	18022	18230	19466	42026	17821	57635
P12259	692	S	5146	4160.8	4749.3	5595.3	3876.3	5622.8	5005.4	5498.1
P12259	1796	S	20812	15310	46733	21628	31093	34492	25968	31532
P12259	1797	S	20812	15310	46733	21628	31093	34492	25968	31532
P12270	379	S	13917	10341	15025	9387.6	12978	12711	14546	10388
P12277	309	S	2605.5	4171.7	3080.3	3741.3	3008	10451	3124	22056
P12429	167	S	11588	3688	7140.7	3635.9	5241.3	6433.9	5721.6	6282.5
P12694	337	S	2350	2625.4	3081.5	2533.9	4331.3	4170.7	4504.7	3533.2
P12694	347	S	10153	8175.5	10044	9164.6	13041	14566	12823	11298
P12755	633	S	1057.5	971.33	1198.7	948.53	1362.1	1187	1416.4	1054.9
P12814	348	S	2591.4	3780.6	3224.2	3116.2	3019.8	4056.8	2873.8	2785.1
P12814	356	S	11492	9989.1	10274	7915.5	8128.8	9132.1	9998	7529.5
P12814	677	S	12573	30062	17956	23910	13750	41483	11201	34778
P12814	91	S	4176.2	6393.3	4458.5	6186	3397.4	7628.9	3496.4	7340.6
P12931	17	S	106087	107978	117865	109084	160066	123498	113061	98216.2
P12956	477	S	11623	7177.6	8820.1	6530.3	10125	8730	9817.5	14550
P12956	27	S	38604	33214	41351	32756	37127	42750	39017	43299
P12980	36	S	12323	10786	11715	9851.5	12449	11576	11068	10590
P13051	64	S	12595	4340.5	12878	4026.4	6147.2	4701.1	6902.7	4361.4
P13051	23	S	11625	4246.3	23061	3468.4	8769.2	4831.7	6897.9	3762.2
P13224	191	S	3679.4	9884.7	3354.7	12557	3299.7	5401.7	6557.8	10598
P13489	178	S	6078.7	5730	6185.6	5959.6	5743.4	8585.5	5545.7	6451.9
P13489	2	S	49724	50620	46887	55491	43305	63457	57348	58952
P13489	7	S	7059.6	6438.9	8223.2	6597.7	7168.5	7064.5	8351.6	6520.9
P13521	556	S	13317	11689	12672	12474	11842	29836	13534	18582
P13521	268	S	36437	30898	29529	28514	30034	91946	29593	71030
P13569	1455	S	3751.7	4266.5	4373.4	5268.3	15254	15211	4666.7	6512.6
P13569	737	S	5438.8	3318	4330.4	2959.8	5604.1	7200.2	4172.3	4340.3
P13591	784	S	31796	35745	26514	29563	25489	156630	23620	145090
P13611	2116	S	212554	1042595	253888	567942	276162	277347	546085	211490
P13611	2941	S	13290	57472	16159	49207	9162.3	11435	18241	11513
P13612	1021	S	113890	94058	87099	84975	108680	94682	81257	78307
P13639	502	S	4985.7	5658.5	5921.6	3698.5	7900	6835.8	6231.1	3858.6
P13716	214	S	17378	19141	14348	17244	16497	19216	15674	17902
P13716	215	S	1530.7	1476.9	1366.6	1498.8	1890.9	1742.3	1467.5	1547
P13796	257	S	106210	68951	93194	68904	94367	76343	113920	62862
P13796	5	S	213860	196870	212710	215160	201660	302910	208250	221390
P13796	7	S	40609	38104	44844	40692	37281	62933	38040	45079
P13796	83	S	5956.8	2956.6	3670.1	3738.7	3788.2	8487.1	3066.4	6052.6
P13797	339	S	80872	60012	92548	56165	69889	66706	87969	50144
P13797	293	S	41571	35628	47591	31126	37433	35977	47326	26263
P13807	652	S	1626.8	1702.6	2352.9	1419.7	1859.5	2578	2235.9	1833.2
P13807	653	S	1626.8	1702.6	2352.9	1419.7	1859.5	2578	2235.9	1833.2
P13807	657	S	1626.8	1702.6	2352.9	1419.7	1859.5	2578	2235.9	1833.2
P13807	710	S	37138	33840	35820	30524	47734	36750	37360	34223
P13807	727	S	14881	14120.9	17458.2	15543	14669.8	19895.6	17183.4	18140.3
P13807	641	S	10276	5497.4	9082.4	5178.9	9121	6910.3	8480.3	5925.7
P13807	645	S	78958	38427.4	88552.4	34475.9	70478	52292.3	73099.3	40695.7
P13807	647	S	10276	5497.4	9082.4	5178.9	9121	6910.3	8480.3	5925.7
P13861	78	S	262460	307350	283150	273790	281490	336680	243100	283290
P13861	80	S	353178	371172	379339	324865	463050	446710	318032	358551
P13861	99	S	15250	11220	10926	11021	13891	9521.3	13470	8163.2
P14317	275	S	88800	68413	58910	70153	71955	64727	76777	58815
P14618	249	S	2496.3	2618.8	1853	2354.5	2110.2	3983.7	2471.1	3510.8
P14618	37	S	28577	15189	21569	11649	21409	16335	21087	11602
P14618	77	S	3342.2	2635.3	2964.2	2743.2	2345.9	3843.9	2757.6	3250.3
P14618	519	S	25955	10024	13102	8290.8	12603	8951.5	10420	7133
P14618	100	S	7963.2	7019.1	7301.8	6287	7825.4	7267.2	6650.1	7345.5
P14625	447	S	19030	13755	16000	12728	18493	17238	18817	13372
P14625	501	S	3081.5	2724.6	3856.5	2652	3656.7	3882.7	3065.1	3340
Q58FF3	158	S	3081.5	2724.6	3856.5	2652	3656.7	3882.7	3065.1	3340
P14672	488	S	10961	17993	10689	13783	11904	40217	13050	71291
P14859	447	S	30327	16118	39962	17179	30893	22534	26977	16754
P14859	448	S	1291.8	1316.1	2744.5	1613	1689.8	1913.7	1413.3	2103.7
P14859	385	S	4005.4	5077.1	6221.3	4259.2	8446.6	10313	8247.7	7857.3
Q9UKI9	287	S	4005.4	5077.1	6221.3	4259.2	8446.6	10313	8247.7	7857.3
P14866	185	S	12729	10113	17625	9031.1	14034	12883	14498	11294
P14868	249	S	5427	3408.2	5597.5	3323.6	5688	4031.1	5899.7	3805.3
P14921	282	S	54731.9	23261.1	33576.6	35655.9	51677.9	30106.5	48981.7	41736.8
P14921	285	S	21925.9	14074.8	17066.6	20084.9	19756.9	20603.5	18912.7	18671.8
P14923	182	S	42507	61318	154530	44595	139030	59750	183570	38444
P15056	446	S	2194.1	2149.9	2427.7	1539.3	2651.3	2446.5	2053.6	2252.4
P15056	729	S	3787.8	2886.3	3601.4	2886.6	4564.8	3819	4408.8	3468.3
P15056	732	S	3787.8	2886.3	3601.4	2886.6	4564.8	3819	4408.8	3468.3
P15056	151	S	4931.9	4360.1	6330.3	4239.2	7298	7500.9	6222.3	7567.2
P15104	343	S	12724	10221	13295	9654.9	18510	13965	15033	11944
P15291	73	S	1463.2	1522.5	1481.9	1520.9	1738.7	1766.3	1519.7	1806.7
P15291	74	S	24083	21807	25072	21095	22614	27484	27870	26784
P15336	112	S	11323	11800	11344	12002	12261	14667	17120	17140
P15336	266	S	4553.8	6633.9	5855.2	6153.5	9522.7	9115.4	8708.4	8318.2
P15374	130	S	19133	23804	18090	19758	19969	29378	25546	21265
P15407	74	S	1709	1191.5	1509.3	1099.9	1297.2	1497.7	1293.2	1240.7
P15408	120	S	47286	17339	47171	18306	28271	22548	35674	18564
P15408	230	S	18359	16478	24601	17806	18054	26116	24309	22187
P15408	200	S	25164	17347	31316	19065	24131	20910	26626	18887
P15822	2220	S	15393	14850	10537	16572	16433	19073	19125	11361
P15822	2221	S	15393	14850	10537	16572	16433	19073	19125	11361
P15822	571	S	16735	7440.5	15299	7698.1	13391	9735.3	11077	8269.8
P15880	264	S	18684	15933	11053	14094	19931	10107	21117	9379.6
P15884	515	S	21207	36101	23854	32652	24819	32834	23687	30033
P15924	22	S	23313	21493	25070	24022	43890	29034	35226	25294
P15924	165	S	15303	15489	28765	16320	42395	20318	36610	17109
P15924	166	S	15303	15489	28765	16320	42395	20318	36610	17109
P15924	2209	S	3357.3	6267	5126.9	5422.3	10943	6940.3	7064.9	5975.1
P15927	238	S	2749.2	2079	2737.7	2363.6	2732	2932.7	2936.2	2328.4
P15941	1240	S	1005.7	2642.5	965.77	1760.7	1017.8	1637.4	1194.4	2089.5
P16070	686	S	120750	78834	118860	80572	99781	108720	107730	96951
P16070	697	S	507330	567700	511060	650030	499850	1058800	548150	911740
P16070	704	S	48744	48325	47245	59337	39999.6	75219	46902	70145
P16070	706	S	789710	863300	841830	1114120	664920	1194600	761530	1069220
P16070	717	S	16378	12628	15402	14300	13740	16354	13533	14576
P16070	718	S	66854	50077	62862	50431	72408	66378	73001	56545
P16070	179	S	35325	17460	28589	14868	24546	22368	24091	16734
P16144	1209	S	4666	4036.4	8264.2	4115.5	5193.2	4505.6	8097.8	5356.2
P16144	1696	S	225.86	196.62	2246.6	250.4	456.02	426.69	1791.7	427.97
P16144	1483	S	9222.2	8125.8	12662	8340.7	10156	10625	14987	11232
P16150	337	S	12256	7797.4	9347.5	13483	7317.8	21083	9014.1	18053
P16150	355	S	10200	8046.1	8259.6	11438	9085	15333	10946	25547
P16152	149	S	9815	9542.3	8694.7	10565	15883	18354	8601	14759
P16152	151	S	12414	7110.6	8215	8366.6	17935	10224	10439	6902.6
P16157	1686	S	3893.3	4933.3	3741	4473.3	3927.2	4547.5	5175.9	5393.5
P16157	1696	S	12046.7	14320.4	9713.9	15161.4	12580.6	15867.5	17956.8	16836.2
P16157	960	S	6426.3	4278.4	5025.2	4044.3	4412.2	5772.5	5444.2	4870.1
P16220	326	S	27903	16823	20735	18151	21818	23545	28139	17572
P16220	256	S	3358.4	3129.4	3421.4	3378	4065.4	4216.1	4617.2	3902.1
P16220	257	S	10953	9284.3	8751.7	11561	10540	11553	11545	11869
P16234	1041	S	10861	11563	11433	11377	12214	11201	8831.6	9781.2
P16234	1045	S	5196.9	6767.5	4362.7	6326.2	4680.1	8369.1	4851.1	10443
P16234	1048	S	5196.9	6767.5	4362.7	6326.2	4680.1	8369.1	4851.1	10443
P16234	767	S	2056.6	6902	2031.4	9607.4	2666.9	5331.6	2094.7	8490.4
P16284	653	S	6916.9	4545.4	5081.2	4021.7	5910	6043.5	5391.2	6233
P16298	478	S	5614.4	6363.9	7439.6	6828.4	6079.7	6794.1	5476.3	7618.7
P16333	166	S	10799	10252	14238	10772	16291	12454	13318	10841
P16333	85	S	84854.5	59541.9	80339.2	62681	77504	77515.6	69874.6	84269
P16333	89	S	6225.5	6810.9	7073.2	7302	7784	9636.6	6116.6	9770
P16333	91	S	16671	12383	17222	12766	13596	16803	11756	10225
P16383	174	S	54909	46676.6	58615	63040.8	57601	57394	55321	55928
P16383	180	S	43026.3	40203.3	46383.1	55283.9	40470.4	45371.1	43295.4	47548.9
P16383	429	S	31707	23055	36941	24631	37302	26926	29731	21721
P16383	430	S	31707	23055	36941	24631	37302	26926	29731	21721
P16401	2	S	80627	18205	27601	18343	21313	24759	24427	20100
P16401	18	S	490030	29993	107790	31982	54092	41126	53031	31408
P16403	2	S	37397	19984	23247	17880	21520	24179	22715	20025
P16455	201	S	1654.4	2232.3	4058.5	3360.9	3001.9	3574.5	2540	3392.9
P16591	411	S	3831.5	7157.5	4527.5	6848.1	3004	4864.7	4677.1	4075.3
P16615	663	S	8871.6	11410	11871	10867	16430	14457	8522.6	12809
P16949	16	S	7410.2	8535.1	6402.9	9688.5	6715.8	8792.2	7890	9413.5
P16949	25	S	15011.2	15272.3	7409.3	17491	7114.6	17356.7	19491.7	18460.5
P16949	46	S	770.71	914.45	693.11	517.55	950.03	697.86	556.64	696.79
Q93045	80	S	770.71	914.45	693.11	517.55	950.03	697.86	556.64	696.79
P16949	38	S	385110	128590	168920	121140	151440	133770	211940	126010
P16949	63	S	5970.6	5642.5	5246.2	6704.3	4024.9	5639.9	4960.9	5680.4
P17026	49	S	24375	46096	34495	43162	57769	107020	47295	92365
P17029	208	S	6564.6	4689.7	5604.1	4341	6802.2	7191.3	6567.5	5623.4
P17029	13	S	1236.8	1258.1	1249.9	857.06	1155.3	1571.9	1314.3	1033.4
P48741	59	S	12930	10311	12406	9734.4	10109	10166	13567	10197
P17066	59	S	12930	10311	12406	9734.4	10109	10166	13567	10197
P17096	99	S	63361	30116	49058	42469	55107	57936	98399	42501
P17096	102	S	170669	95708	127363	115289	173014	156867	183907	126668
P17096	103	S	133719	83431.3	105030	102966	129926	131197	166704	111164
P17096	36	S	35161	23169	36687	31720	69279	182130	71047	161280
P17152	17	S	1190.5	1004.3	1196.2	963.34	1343	1813.8	1803.2	1235.6
P17181	495	S	33218	34358	29397	40844	30428	33431	29294	36974
P17252	226	S	179010	146850	78145	106880	80465	98123	86258	87977
P17275	259	S	40004.3	25007.9	35038.2	24007.5	29724.8	29231.5	35583.9	25388.6
P17275	251	S	6822	4936.9	6105	5540.7	5289.2	6775.6	6890.7	5225.9
P17301	1181	S	27253	14923	26759	14980	17546	15618	23838	15368
P17302	372	S	6896.6	7447.8	8466.5	6359.1	7368.5	10702	7217.9	12047
P17302	373	S	6896.6	7447.8	8466.5	6359.1	7368.5	10702	7217.9	12047
P17302	364	S	20513	15811	13723	13941	12036	16480	12944	23820
P17302	365	S	17926.8	17075.9	15633.5	15553	17636	18467.2	16579.5	18885.5
P17302	368	S	16242	15101	13955	13743	15943	16337	15049	16491
P17302	273	S	4098.6	5830.7	5431.7	5013.5	5722.6	5251.6	4370.1	4758.8
P17480	484	S	35723	8746.3	39675	9047.1	21992	14044	15493	9582.3
P17535	255	S	1063.3	1071.8	1085.5	1294	1219.5	1204.1	1276	1417.4
P17535	100	S	3387.5	4645.8	3033.1	3774.8	2483.9	6207.9	4719.2	6211.9
[truncated: 10,029 more rows]
