# Supplementary material for: Proteomic and Phosphoproteomic Profiling Reveals the Oncogenic Role of Protein Kinase D Family Kinases in Cholangiocarcinoma
Source: Cells. 2022 Sep 30;11(19):3088. doi: 10.3390/cells11193088 (PMC9562908; doi:10.3390/cells11193088)
Supplement: Supplementary file 1 [file cells-11-03088-s001.zip › cells-1871545-supplementary/Table S4 List of siRNA.xlsx]

## Sheet: Sheet1
Supplementary Table 2. The list of siRNAs for 9 candidate PKs.
Gene	target sequence(5'-3')		Name	sequence(5'-3')
si-BCKDK-1	TCAGGACCCATGCACGGCTTT		si-NC	Sense	UUC UCC GAA CGU GUC ACG UTT
si-BCKDK-2	ACGCTGACTTCGAGGCTTGGA			Anti-sense	ACG UGA CAC GUU CGG AGA ATT
si-BCKDK-3	GATCTGATCATCAGGATCTCA
si-CSNK1A1-1	GCAGAATTTGCGATGTACTTA
si-CSNK1A1-2	CATCTATTTGGCGATCAACAT
si-CSNK1A1-3	GCCTGCTTAATTGTGCTAGAA
si-CSNK2A2-1	CTGGGACAACATTCACGGAAA
si-CSNK2A2-2	CCTCACAATGTCATGATAGAT
si-CSNK2A2-3	CCTCGTGGACTATCAGATGTA
si-PDK2-1	CACCTCTACCACATGCTCTTT
si-PDK2-2	ACAGCCGATTCACATGGTCTA
si-PDK2-3	GTACATAGAGCACTTCAGCAA
si-PRKCA-1	CTTTGGAGTTTCGGAGCTGAT
si-PRKCA-2	CGAGCTATTTCAGTCTATCAT
si-PRKCA-3	CATGGAACTCAGGCAGAAATT
si-PRKCZ-1	CGCGTGATTGACCCTTTAACT
si-PRKCZ-2	CTGGTGCGGTTGAAGAAGAAT
si-PRKCZ-3	GCCTCCAGTAGACGACAAGAA
si-PRKD1-1	CCCACGCTCTCTTTGTTCATT
si-PRKD1-2	CAATTCACCTTGACAAGATTT
si-PRKD1-3	CAGGAAGAGATGTAGCTATTA
si-PRKD2-1	CAGTTTGGAGTGGTCTATGGA
si-PRKD2-2	CTTCTACGGCCTTTACGACAA
si-PRKD2-3	CACGACCAACAGATACTATAA
si-PRKD3-1	CGAGTCTTTGTAGTAATGGAA
si-PRKD3-2	CCAGGAACCAAGTAAGAGAAT
si-PRKD3-3	CAGGACTATCAGACTTGGCTT
