# Supplementary material for: Proteomic and Phosphoproteomic Profiling Reveals the Oncogenic Role of Protein Kinase D Family Kinases in Cholangiocarcinoma
Source: Cells. 2022 Sep 30;11(19):3088. doi: 10.3390/cells11193088 (PMC9562908; doi:10.3390/cells11193088)
Supplement: Supplementary file 1 [file cells-11-03088-s001.zip › cells-1871545-supplementary/Table S5 List of predicted kinase from different methods.xlsx]

## Sheet: Sheet1
The list of CCA-associated PKs predicted by the CifPK pipeline.
PK	Enrichment-based				KSEA-based
	P1	P2	P3	P4	P1	P2	P3	P4
CSNK2A1	0.00203758	9.23155e-05	0.0108759	-	-	0.0409362	-	0.0295006
PDK3	-	-	0.019983	0.0350316	-	-	0.00668955	0.0294616
PRKD2	-	-	0.000239891	0.0368604	-	0.00495099	0.0351435	0.000238369
CSNK1A1	0.00303851	8.85126e-05	-	-	0.00123421	0.000278139	-	-
PRKCA	-	-	0.0007091	9.2438e-05	-	-	0.00812469	0.00118756
PRKCZ	-	-	0.000135693	6.90341e-05	0.0028768	-	0.00844949	-
PRKD1	-	-	0.0043046	-	0.0396201	-	-	0.00760715
PRKD3	-	-	0.000142459	0.0409135	-	-	-	-
BCKDK	-	-	0.0244733	0.0409135	-	-	-	-
PDK2	-	-	0.00011573	-	0.0433917	-	0.0103923	0.0479499
CSNK2A2	0.00114402	6.70425e-05	0.00718636	-	-	-	-	-

## Sheet: Sheet2
The list of CCA-associated PKs predicted by KSEA-based method.
Patient 1							Patient 2							Patient 3							Patient 4								Summary
Kinase.Gene	mS	Enrichment	m	z.score	p.value	FDR	Kinase.Gene	mS	Enrichment	m	z.score	p.value	FDR	Kinase.Gene	mS	Enrichment	m	z.score	p.value	FDR	Kinase.Gene	mS	Enrichment	m	z.score	p.value	FDR		PDK1
CDK1	0.19402	2.09861	79	3.78215	7.774e-05	0.0118942	CDK1	0.155088	1.53738	79	3.63343	0.00013984	0.0212776	PRKG1	-0.751969	-3.15964	9	-2.89914	0.00187092	0.159003	CHEK2	-1.33588	-33.8694	3	-4.29198	8.85449e-06	0.00135474		PBK
CSNK1A1	-1.11143	-12.0218	4	-3.02719	0.00123421	0.0717811	CSNK1A1	-1.18164	-11.7135	4	-3.45208	0.000278139	0.0212776	RPS6KB1	-0.700885	-2.94499	9	-2.611	0.00451387	0.159003	HCK	-1.17004	-29.6648	3	-3.77445	8.01806e-05	0.0058768		WEE1
CDK2	0.107658	1.16448	101	2.98726	0.00140747	0.0717811	DYRK1A	-2.08299	-20.6485	1	-3.16555	0.000773959	0.0394719	STK38	-0.899031	-3.77756	4	-2.48578	0.00646346	0.159003	SGK1	0.720828	18.2756	9	3.68305	0.000115231	0.0058768		CAMK2A
WEE1	1.00718	10.8941	3	2.82912	0.00233379	0.0880302	CDK2	0.0843555	0.836209	101	2.97304	0.00147431	0.0501212	PDK3	-1.16823	-4.90869	2	-2.47352	0.00668955	0.159003	PRKD2	-1.33161	-33.7611	2	-3.4935	0.000238369	0.00911762		PRKAA1
PRKCZ	-1.40704	-15.2191	2	-2.7615	0.0028768	0.0880302	WEE1	0.962171	9.53793	3	2.94059	0.00163795	0.0501212	PDK4	-1.16823	-4.90869	2	-2.47352	0.00668955	0.159003	PRKACA	-0.199482	-5.05759	61	-3.36215	0.000386688	0.0118327		CDK1
STK38	-0.982927	-10.6318	4	-2.64542	0.00407951	0.104028	PRKD2	-1.24285	-12.3203	2	-2.57923	0.00495099	0.12625	CAMK2A	-0.820177	-3.44623	5	-2.44766	0.00718938	0.159003	CAMK2A	-0.758098	-19.2205	5	-3.21314	0.000656452	0.0167395		PDK2
PRKCD	-0.451121	-4.87952	14	-1.99343	0.0231073	0.39248	CAMK2A	-0.715559	-7.09328	5	-2.1951	0.0140782	0.30771	PRKCA	-0.475347	-1.99732	29	-2.40327	0.00812469	0.159003	PRKCA	-0.273751	-6.94059	29	-3.03881	0.00118756	0.0259566		STK38
PRKCH	-0.700287	-7.5746	4	-1.80575	0.0354787	0.39248	PRKG1	-0.54162	-5.36904	9	-2.11167	0.0173575	0.331962	PRKCZ	-1.13641	-4.77498	2	-2.3889	0.00844949	0.159003	JAK3	-1.55719	-39.4804	1	-2.87672	0.00200916	0.0341558		PRKG1
PRKD1	0.235259	2.54466	13	1.75511	0.0396201	0.39248	RPS6KB1	-0.498184	-4.93845	9	-1.90355	0.0284841	0.439496	PDK1	-0.947894	-3.98288	3	-2.31187	0.0103923	0.159003	SYK	-1.55719	-39.4804	1	-2.87672	0.00200916	0.0341558		PRKD2
MAPK14	-0.429882	-4.64978	12	-1.73627	0.0412584	0.39248	RPS6KA3	-0.490736	-4.86463	9	-1.86787	0.0308898	0.439496	PDK2	-0.947894	-3.98288	3	-2.31187	0.0103923	0.159003	PRKG1	-0.484572	-12.2857	9	-2.83242	0.00230987	0.035341		CDK2
PKMYT1	0.733895	7.93812	2	1.73588	0.0412926	0.39248	MAPK14	-0.436687	-4.32884	12	-1.85781	0.0315977	0.439496	AKT1	-0.441161	-1.85368	33	-2.19441	0.0141028	0.177885	PLK1	-0.509616	-12.9206	8	-2.79805	0.00257057	0.0357543		PRKCZ
PDK1	0.573215	6.20013	3	1.71261	0.0433917	0.39248	MELK	1.03673	10.277	1	1.81682	0.0346222	0.441433	PRKAA1	-0.548537	-2.30485	14	-2.18471	0.0144552	0.177885	PTK6	-1.48375	-37.6184	1	-2.7444	0.00303112	0.0386467		CAMK1
PDK2	0.573215	6.20013	3	1.71261	0.0433917	0.39248	PKMYT1	0.680253	6.74329	2	1.76425	0.0388453	0.447375	PRKACA	-0.38454	-1.61577	61	-2.15204	0.0156973	0.177885	AURKB	-0.413786	-10.491	10	-2.58232	0.00490698	0.0577514		PDK3
PBK	-0.900697	-9.74232	2	-1.69785	0.0447678	0.39248	CSNK2A1	-0.241527	-2.39424	60	-1.73992	0.0409362	0.447375	MAPK8	-0.639935	-2.68889	8	-2.13754	0.016277	0.177885	PRKAA1	-0.324484	-8.22684	14	-2.45341	0.00707552	0.0773254		PLK1
UHMK1	0.537728	5.81629	3	1.62132	0.052475	0.39248	STK38	-0.631828	-6.26326	4	-1.69591	0.0449512	0.448493	MAP2K1	-0.738756	-3.10412	5	-2.10535	0.0176306	0.179832	PRKD1	-0.334193	-8.47302	13	-2.42724	0.00760715	0.0775929		PDK4
LIMK1	0.674467	7.29533	2	1.61104	0.0535853	0.39248	PRKAA1	-0.381296	-3.77976	14	-1.67567	0.0469012	0.448493	PLK1	-0.600663	-2.52388	8	-1.92869	0.0268844	0.257082	JAK2	-0.590581	-14.9734	4	-2.27028	0.0115953	0.104917		PKMYT1
LIMK2	0.674467	7.29533	2	1.61104	0.0535853	0.39248	PRKCB	-0.547042	-5.42278	5	-1.59331	0.0555458	0.451397	PRKD2	-0.918717	-3.86028	2	-1.81006	0.0351435	0.269152	PRKCB	-0.52356	-13.2742	5	-2.26824	0.0116574	0.104917		PRKACA
CDK3	-1.15993	-12.5463	1	-1.58562	0.0564123	0.39248	CAMK2B	-1.06002	-10.5078	1	-1.53179	0.0627866	0.451397	CDK3	-1.18995	-4.99995	1	-1.78987	0.0367371	0.269152	CAMK1	-0.823162	-20.8702	2	-2.19796	0.0139761	0.114021		CSNK1A1
MAPK15	-1.15993	-12.5463	1	-1.58562	0.0564123	0.39248	CAMK4	-1.06002	-10.5078	1	-1.53179	0.0627866	0.451397	MAPK15	-1.18995	-4.99995	1	-1.78987	0.0367371	0.269152	WEE1	0.736687	18.6777	3	2.1759	0.0147814	0.114021		CSNK2A1
VRK1	-1.15993	-12.5463	1	-1.58562	0.0564123	0.39248	STK39	-1.05124	-10.4209	1	-1.51779	0.0645341	0.451397	VRK1	-1.18995	-4.99995	1	-1.78987	0.0367371	0.269152	PBK	-0.813216	-20.618	2	-2.17261	0.0149047	0.114021		PRKCA
MAP4K3	-1.13186	-12.2427	1	-1.54393	0.0613025	0.39248	MAPKAPK2	0.180679	1.79106	11	1.49136	0.0679329	0.451397	CAMK1	-0.904655	-3.80119	2	-1.77266	0.0381422	0.269152	CDK1	0.169045	4.28592	79	2.0755	0.0189701	0.138211		PRKD1
CAMK2B	-1.12184	-12.1343	1	-1.52905	0.0631262	0.39248	PLK2	0.557545	5.5269	2	1.4871	0.068494	0.451397	CAMK2D	-1.17723	-4.9465	1	-1.76596	0.0387016	0.269152	MELK	1.16602	29.5628	1	2.0298	0.0211884	0.147356		RPS6KB1
CAMK4	-1.12184	-12.1343	1	-1.52905	0.0631262	0.39248	SGK1	0.204708	2.02925	9	1.46411	0.0715815	0.451397	PBK	-0.888482	-3.73324	2	-1.72966	0.0418455	0.278363	MAP4K3	-1.04913	-26.5994	1	-1.96133	0.02492	0.165772		MAPK14
CDK14	0.62522	6.76265	2	1.50759	0.0658296	0.39248	MAPK6	0.805492	7.98478	1	1.44752	0.0738751	0.451397	CDK9	-0.751585	-3.15803	3	-1.67257	0.0472056	0.300936	PDK3	-0.701818	-17.7936	2	-1.88877	0.0294616	0.1736		MELK
MAP2K1	-0.542867	-5.87188	5	-1.49603	0.067323	0.39248	PAK2	0.805492	7.98478	1	1.44752	0.0738751	0.451397	JAK2	-0.671184	-2.82019	4	-1.62898	0.0516588	0.305247	PDK4	-0.701818	-17.7936	2	-1.88877	0.0294616	0.1736		AURKB
RPS6KA3	-0.425443	-4.60177	9	-1.48387	0.0689215	0.39248	ERBB2	0.792997	7.86091	1	1.42757	0.0767081	0.451397	WEE1	0.261597	1.09918	3	1.62697	0.0518721	0.305247	CSNK2A1	0.174735	4.43018	60	1.88818	0.0295006	0.1736		CAMK2D
MELK	0.904802	9.78672	1	1.48132	0.0692611	0.39248	LCK	0.52042	5.15888	2	1.40325	0.0802711	0.453141	CSNK2A1	-0.128975	-0.541929	60	1.58773	0.0561738	0.318279	MAPK6	1.04353	26.4574	1	1.80912	0.0352165	0.192433		CDK3
DYRK1A	-1.07469	-11.6243	1	-1.45901	0.0722815	0.394967	UHMK1	0.400045	3.96561	3	1.38564	0.0829278	0.453141	NUAK1	0.572112	2.40391	1	1.52316	0.0638591	0.318279	PAK2	1.04353	26.4574	1	1.80912	0.0352165	0.192433		CDK9
MAPK9	-0.641086	-6.93426	3	-1.41152	0.0790462	0.417037	PRKCD	-0.322614	-3.19805	14	-1.32501	0.0925838	0.47979	MET	-1.04604	-4.39528	1	-1.5193	0.0643433	0.318279	TESK1	-0.933278	-23.662	1	-1.75259	0.0398361	0.21017		CHEK2
PRKCE	-0.404584	-4.37615	9	-1.39092	0.0821248	0.417916	GTF2F1	-0.906389	-8.98496	1	-1.28644	0.099144	0.47979	LIMK1	0.324286	1.36259	2	1.4951	0.0674436	0.318279	MAPKAPK2	-0.246674	-6.2541	11	-1.70975	0.0436563	0.222647		DYRK1A
EEF2K	-0.746668	-8.07628	2	-1.37429	0.0846758	0.417916	EEF2K	-0.651002	-6.45333	2	-1.2425	0.107027	0.47979	LIMK2	0.324286	1.36259	2	1.4951	0.0674436	0.318279	PDK1	-0.494111	-12.5275	3	-1.66506	0.0479499	0.22926		HCK
MAPKAPK2	0.173267	1.87413	11	1.30907	0.0952561	0.419969	MAP3K8	-0.542805	-5.38078	3	-1.22245	0.110769	0.47979	CLK2	-1.02203	-4.29439	1	-1.47415	0.0702201	0.318279	PDK2	-0.494111	-12.5275	3	-1.66506	0.0479499	0.22926		JAK2
LCK	0.521243	5.63799	2	1.28917	0.0986695	0.419969	CDK5	0.0975699	0.967202	14	1.18585	0.11784	0.47979	MAP3K8	-0.688544	-2.89314	3	-1.46727	0.0711509	0.318279	CAMK2B	-0.831543	-21.0827	1	-1.56929	0.05829	0.24433		MAPKAPK2
MET	-0.955894	-10.3394	1	-1.28255	0.0998244	0.419969	CAMK1	-0.612843	-6.07506	2	-1.15631	0.123777	0.47979	MAPK13	-0.625376	-2.62771	4	-1.45672	0.0725967	0.318279	CAMK4	-0.831543	-21.0827	1	-1.56929	0.05829	0.24433		PAK2
RPS6KB1	-0.379561	-4.1055	9	-1.27941	0.100376	0.419969	HIPK2	0.194294	1.92602	6	1.15471	0.124106	0.47979	MAP4K3	-1.00181	-4.20942	1	-1.43613	0.0754826	0.318279	ALK	-0.821977	-20.8401	1	-1.55205	0.0603246	0.24433		PRKCB
RAF1	0.400239	4.32916	3	1.26759	0.102473	0.419969	CSNK2B	0.587943	5.82823	1	1.10009	0.135647	0.47979	PRKCE	-0.490806	-2.06228	9	-1.42602	0.0769308	0.318279	FER	-0.821977	-20.8401	1	-1.55205	0.0603246	0.24433		PRKCD
LATS1	0.506534	5.47889	2	1.25827	0.104147	0.419969	PRKCE	-0.32157	-3.1877	9	-1.05737	0.145171	0.47979	MAPK6	0.511324	2.14849	1	1.40887	0.0794372	0.318279	PKM	-0.821977	-20.8401	1	-1.55205	0.0603246	0.24433		PRKCH
PRKD3	-0.685958	-7.41961	2	-1.24676	0.106243	0.419969	FYN	0.552205	5.47397	1	1.04301	0.148472	0.47979	PAK2	0.511324	2.14849	1	1.40887	0.0794372	0.318279	GSK3A	-0.45694	-11.5851	3	-1.54906	0.0606832	0.24433		MAPK6
ERBB2	0.736545	7.96678	1	1.23139	0.109089	0.419969	PLK1	-0.330774	-3.27894	8	-1.03847	0.149525	0.47979	LMTK2	-0.758729	-3.18804	2	-1.38465	0.0830803	0.318279	CLK2	-0.811269	-20.5686	1	-1.53276	0.0626672	0.244991		MAPK15
PDPK1	0.274569	2.96985	5	1.21904	0.111414	0.419969	PRKCZ	-0.541545	-5.36829	2	-0.99528	0.1598	0.47979	MAP2K2	-0.75841	-3.1867	2	-1.3838	0.0832102	0.318279	LCK	-0.557735	-14.1406	2	-1.52164	0.0640501	0.244991		MAP4K3
ATR	0.240965	2.60638	6	1.21313	0.112541	0.419969	PDGFRA	0.511981	5.07523	1	0.978771	0.163847	0.47979	CAMK2B	-0.928169	-3.9	1	-1.29767	0.0971997	0.343933	CDK9	-0.443743	-11.2505	3	-1.50788	0.0657925	0.245518		MAP2K1
PAK1	0.0977855	1.05769	16	1.13031	0.129172	0.460022	PDGFRB	0.511981	5.07523	1	0.978771	0.163847	0.47979	CAMK4	-0.928169	-3.9	1	-1.29767	0.0971997	0.343933	RPS6KA1	0.268601	6.81002	13	1.48868	0.0682856	0.248755		PTK6
BRAF	0.334977	3.62326	3	1.09968	0.135735	0.460022	CAMK2D	-0.702758	-6.96639	1	-0.961235	0.168217	0.47979	CHEK2	-0.63227	-2.65668	3	-1.28401	0.0995695	0.343933	CDK6	-0.758794	-19.2382	1	-1.43822	0.0751864	0.267524		RPS6KA3
TBK1	-0.595415	-6.44026	2	-1.05656	0.145357	0.460022	MAP3K11	-0.686617	-6.80638	1	-0.935457	0.174776	0.47979	MAPK3	-0.341717	-1.43583	43	-1.27886	0.100473	0.343933	RPS6KB1	0.30204	7.65781	9	1.4194	0.0778912	0.270849		AKT1
CSNK1D	0.379184	4.10141	2	0.990749	0.160904	0.460022	PLK3	0.231805	2.29787	3	0.920264	0.178717	0.47979	CSNK2A2	0.241504	1.01476	2	1.27499	0.101157	0.343933	SRC	-0.253074	-6.41635	7	-1.39441	0.0815965	0.276276		SGK1
IRAK4	-0.476821	-5.1575	3	-0.988897	0.161357	0.460022	PRKCH	-0.379335	-3.76032	4	-0.889421	0.186889	0.47979	RPS6KA1	-0.417343	-1.7536	13	-1.21585	0.11202	0.37259	ARAF	-0.504016	-12.7786	2	-1.38476	0.0830632	0.276276		JAK3
PLK2	0.3753	4.0594	2	0.982591	0.162904	0.460022	TESK1	-0.655013	-6.49308	1	-0.884983	0.188083	0.47979	PRKCB	-0.52275	-2.1965	5	-1.1972	0.115615	0.376363	UHMK1	0.473331	12.0007	3	1.35404	0.0878614	0.286017		SYK
PDK3	0.373518	4.04013	2	0.978848	0.163828	0.460022	ULK1	0.211365	2.09524	3	0.863722	0.19387	0.47979	STK39	-0.861125	-3.61829	1	-1.17162	0.120675	0.38383	PRKCG	-0.483607	-12.2612	2	-1.33276	0.0913061	0.28842		TESK1
PDK4	0.373518	4.04013	2	0.978848	0.163828	0.460022	PRKCA	-0.200059	-1.98317	29	-0.852991	0.196832	0.47979	MAP3K11	-0.849009	-3.56738	1	-1.14884	0.125312	0.38383	ATM	0.284816	7.22112	9	1.3263	0.0923698	0.28842		VRK1
JAK3	0.556405	6.01831	1	0.963809	0.167571	0.460022	CDK6	0.431727	4.27967	1	0.8506	0.197496	0.47979	GSK3A	-0.586387	-2.46389	3	-1.13459	0.128274	0.38383	CSNK2A2	0.549986	13.9442	2	1.30089	0.0966478	0.295742		MAPK8
SYK	0.556405	6.01831	1	0.963809	0.167571	0.460022	ROCK1	0.200041	1.98299	3	0.832398	0.202592	0.47979	PLK3	-0.583949	-2.45365	3	-1.12665	0.129946	0.38383	PAK1	-0.137939	-3.49725	16	-1.27838	0.100558	0.298076
CAMK2A	-0.379163	-4.10119	5	-0.952295	0.170474	0.460022	BLVRA	-0.600507	-5.95277	1	-0.797934	0.212454	0.47979	PRKCD	-0.397434	-1.66994	14	-1.12168	0.130998	0.38383	PRKCD	-0.149357	-3.78674	14	-1.27279	0.101547	0.298076
NEK9	-0.732174	-7.91951	1	-0.950241	0.170995	0.460022	CDK20	0.390945	3.87541	1	0.785469	0.216089	0.47979	MAPKAPK2	-0.0595902	-0.250387	11	1.1125	0.132961	0.38383	BRAF	-0.365344	-9.26281	3	-1.26322	0.103255	0.298076
PRKD2	-0.531311	-5.74689	2	-0.921897	0.178291	0.460022	MAP4K3	-0.591853	-5.86699	1	-0.784113	0.216487	0.47979	FYN	0.320661	1.34736	1	1.05038	0.146771	0.410192	CDK4	-0.292662	-7.42004	4	-1.19673	0.115706	0.327833
GSK3A	-0.448343	-4.84947	3	-0.91563	0.179931	0.460022	NEK2	0.38679	3.83422	1	0.778834	0.218039	0.47979	RET	-0.515162	-2.16462	4	-1.04227	0.148642	0.410192	CDK20	0.697246	17.6777	1	1.18519	0.11797	0.328172
STK39	-0.697182	-7.54102	1	-0.898264	0.184522	0.460022	MAPK13	-0.344468	-3.41468	4	-0.778052	0.218269	0.47979	RPS6KA3	-0.42149	-1.77103	9	-1.03504	0.150325	0.410192	AKT2	-0.283043	-7.17616	4	-1.16207	0.122604	0.329591
IRAK1	-0.679327	-7.34789	1	-0.871742	0.191674	0.460022	IRAK1	-0.579421	-5.74375	1	-0.764259	0.222357	0.47979	AURKB	-0.0656958	-0.276042	10	1.02443	0.152816	0.410192	MAPK8	-0.18841	-4.77688	8	-1.16116	0.122789	0.329591
NEK6	-0.679327	-7.34789	1	-0.871742	0.191674	0.460022	NEK6	-0.579421	-5.74375	1	-0.764259	0.222357	0.47979	MAPK11	-0.474003	-1.99167	5	-0.99225	0.160538	0.423487	STK38	-0.271857	-6.89256	4	-1.12176	0.130982	0.345522
LMTK2	0.321674	3.47936	2	0.869941	0.192166	0.460022	PRKG2	-0.438924	-4.35102	2	-0.763502	0.222582	0.47979	PDPK1	-0.470421	-1.97662	5	-0.977191	0.164237	0.425903	PRKCZ	-0.378769	-9.60317	2	-1.06562	0.143297	0.364739
PRKG1	-0.286112	-3.09471	9	-0.862985	0.194073	0.460022	CDK4	0.137242	1.36047	4	0.760584	0.223453	0.47979	NEK9	-0.741919	-3.11741	1	-0.947487	0.171695	0.435446	IKBKE	-0.366836	-9.30062	2	-1.03522	0.150284	0.364739
CDK5	0.0607016	0.656574	14	0.851204	0.197328	0.460022	CLK2	-0.560538	-5.55657	1	-0.734102	0.231443	0.47979	CDK5	-0.104376	-0.438571	14	0.939999	0.173609	0.435446	MAPK11	-0.216274	-5.48333	5	-1.03023	0.15145	0.364739
FYN	0.461771	4.99471	1	0.82324	0.205186	0.460022	GSK3A	-0.358745	-3.55621	3	-0.713304	0.237829	0.47979	PRKCQ	-0.483343	-2.03092	4	-0.92262	0.178103	0.436958	AURKA	-0.521008	-13.2095	1	-1.00979	0.156299	0.364739
NUAK1	0.444961	4.81289	1	0.798271	0.212357	0.460022	RPS6KA1	-0.22291	-2.20969	13	-0.702689	0.241125	0.47979	AKT2	-0.479594	-2.01517	4	-0.908523	0.181801	0.436958	RET	-0.239735	-6.07815	4	-1.00601	0.157205	0.364739
CSNK2B	0.432279	4.67571	1	0.779433	0.217862	0.460022	PBK	-0.410803	-4.07226	2	-0.699989	0.241967	0.47979	DYRK1A	-0.706986	-2.97063	1	-0.881804	0.188941	0.436958	CDK3	-0.518605	-13.1485	1	-1.00546	0.157339	0.364739
RET	-0.352558	-3.81342	4	-0.772721	0.219844	0.460022	PRKCI	0.149933	1.48628	3	0.693791	0.243907	0.47979	DYRK2	-0.427634	-1.79684	6	-0.873404	0.191221	0.436958	MAPK15	-0.518605	-13.1485	1	-1.00546	0.157339	0.364739
MAPK7	0.271209	2.93351	2	0.763931	0.222454	0.460022	STK3	-0.400385	-3.96898	2	-0.676458	0.249375	0.47979	LATS2	-0.702272	-2.95082	1	-0.872942	0.191347	0.436958	VRK1	-0.518605	-13.1485	1	-1.00546	0.157339	0.364739
HIPK2	0.112997	1.22222	6	0.747517	0.227376	0.460022	CAMK1G	-0.515868	-5.11375	1	-0.662761	0.253742	0.47979	STK38L	-0.702272	-2.95082	1	-0.872942	0.191347	0.436958	AKT1	-0.0561643	-1.42397	33	-0.989547	0.161198	0.368108
PRKCA	-0.000292006	-0.00315846	29	0.737197	0.230501	0.460022	PNCK	-0.515868	-5.11375	1	-0.662761	0.253742	0.47979	PKMYT1	0.0824843	0.346584	2	0.852151	0.197065	0.443397	CHEK1	-0.0852598	-2.16165	19	-0.97936	0.163701	0.368327
PRKCI	0.191599	2.07241	3	0.7308	0.232451	0.460022	NLK	-0.512982	-5.08515	1	-0.658153	0.25522	0.47979	PRKD3	-0.533825	-2.24303	2	-0.786622	0.215752	0.447638	PRKCH	-0.225882	-5.72693	4	-0.956091	0.169513	0.370591
MAPK11	-0.312297	-3.37794	5	-0.730204	0.232633	0.460022	CHEK1	-0.192185	-1.90512	19	-0.635623	0.262511	0.47979	CDK2	-0.198057	-0.8322	101	0.754605	0.225243	0.447638	LATS2	-0.485824	-12.3174	1	-0.946394	0.171974	0.370591
MAP2K3	-0.439818	-4.75726	2	-0.7297	0.232787	0.460022	ALK	0.285714	2.83226	1	0.61741	0.268482	0.47979	TBK1	-0.512458	-2.15325	2	-0.729807	0.232754	0.447638	STK38L	-0.485824	-12.3174	1	-0.946394	0.171974	0.370591
MAP3K5	-0.439818	-4.75726	2	-0.7297	0.232787	0.460022	FER	0.285714	2.83226	1	0.61741	0.268482	0.47979	CHEK1	-0.152638	-0.641357	19	0.699531	0.24211	0.447638	PKMYT1	0.403773	10.2371	2	0.928334	0.176617	0.375311
CAMK2D	-0.578225	-6.25433	1	-0.721565	0.235281	0.460022	PKM	0.285714	2.83226	1	0.61741	0.268482	0.47979	ERBB2	0.125191	0.526029	1	0.682859	0.247348	0.447638	MAP3K11	-0.45127	-11.4413	1	-0.884136	0.188311	0.38142
PRKCB	-0.305243	-3.30164	5	-0.706774	0.239854	0.460022	PRKCQ	0.0864107	0.856582	4	0.598222	0.274846	0.47979	MELK	0.12208	0.512958	1	0.67701	0.2492	0.447638	ERBB2	0.526837	13.3572	1	0.87816	0.189929	0.38142
MAP3K11	-0.563538	-6.09546	1	-0.699749	0.242042	0.460022	AKT1	-0.165341	-1.63901	33	-0.591405	0.277124	0.47979	AURKA	0.121055	0.50865	1	0.675082	0.249812	0.447638	MAP2K3	-0.302537	-7.67043	2	-0.87138	0.191773	0.38142
MAP3K8	-0.364132	-3.9386	3	-0.698973	0.242285	0.460022	PDK3	-0.362174	-3.5902	2	-0.590157	0.277543	0.47979	LCK	0.0154485	0.0649117	2	0.673902	0.250187	0.447638	MAP3K5	-0.302537	-7.67043	2	-0.87138	0.191773	0.38142
NLK	-0.557988	-6.03543	1	-0.691505	0.244624	0.460022	PDK4	-0.362174	-3.5902	2	-0.590157	0.277543	0.47979	MAPK7	0.00522493	0.0219542	2	0.646717	0.258907	0.447638	RPS6KA3	-0.113811	-2.88553	9	-0.82837	0.203731	0.38142
CDK9	0.1752	1.89504	3	0.688611	0.245534	0.460022	GSK3B	-0.183286	-1.8169	20	-0.588576	0.278073	0.47979	PIM1	-0.58121	-2.44214	1	-0.645319	0.25936	0.447638	ATR	0.22705	5.75654	6	0.827979	0.203841	0.38142
CDK6	0.370339	4.00574	1	0.687427	0.245907	0.460022	AURKB	0.0144378	0.143121	10	0.582386	0.280153	0.47979	PIM3	-0.58121	-2.44214	1	-0.645319	0.25936	0.447638	CDK14	-0.284508	-7.21331	2	-0.82544	0.204561	0.38142
IKBKE	0.23142	2.50313	2	0.680346	0.248143	0.460022	PAK1	-0.0106275	-0.10535	16	0.576543	0.282124	0.47979	JAK3	-0.580654	-2.4398	1	-0.644275	0.259698	0.447638	PIM1	-0.417851	-10.594	1	-0.823924	0.204991	0.38142
ARAF	0.230883	2.49732	2	0.679218	0.2485	0.460022	CDK9	-0.301882	-2.99253	3	-0.556013	0.289101	0.47979	SYK	-0.580654	-2.4398	1	-0.644275	0.259698	0.447638	PIM3	-0.417851	-10.594	1	-0.823924	0.204991	0.38142
RPS6KA1	-0.216802	-2.34502	13	-0.665978	0.252713	0.460022	SRC	0.0285499	0.283013	7	0.546888	0.292228	0.47979	PRKCH	-0.404185	-1.69831	4	-0.624953	0.266001	0.447638	MAP3K7	0.360148	9.13108	2	0.817175	0.206914	0.38142
PDGFRA	0.350346	3.78949	1	0.657731	0.255356	0.460022	PKN1	-0.442431	-4.38578	1	-0.545478	0.292712	0.47979	MAPK1	-0.188536	-0.792193	43	0.609765	0.271009	0.447638	MARK2	0.360148	9.13108	2	0.817175	0.206914	0.38142
PDGFRB	0.350346	3.78949	1	0.657731	0.255356	0.460022	IKBKE	-0.332119	-3.29227	2	-0.522274	0.30074	0.47979	CLK1	-0.464316	-1.95097	2	-0.601797	0.273655	0.447638	ULK1	-0.217109	-5.50451	3	-0.800622	0.211675	0.385551
NEK2	0.344182	3.72281	1	0.648574	0.258307	0.460022	STK11	0.062229	0.616871	4	0.520983	0.301189	0.47979	GTF2F1	-0.557928	-2.34431	1	-0.601544	0.273739	0.447638	CLK1	-0.264766	-6.71277	2	-0.775136	0.21913	0.390717
PRKCG	0.213169	2.30573	2	0.642009	0.260434	0.460022	CDK3	-0.419675	-4.1602	1	-0.509135	0.305329	0.47979	PRKG2	-0.462021	-1.94133	2	-0.595695	0.275689	0.447638	PRKG2	-0.264116	-6.69631	2	-0.773481	0.219619	0.390717
CHEK2	-0.340619	-3.68428	3	-0.638479	0.261581	0.460022	MAPK15	-0.419675	-4.1602	1	-0.509135	0.305329	0.47979	IRAK1	-0.536106	-2.25262	1	-0.560515	0.287564	0.447638	PRKDC	-0.199973	-5.07004	3	-0.747145	0.227488	0.400065
AURKA	0.317769	3.43713	1	0.609341	0.271149	0.47143	VRK1	-0.419675	-4.1602	1	-0.509135	0.305329	0.47979	NEK6	-0.536106	-2.25262	1	-0.560515	0.287564	0.447638	RAF1	-0.187978	-4.76593	3	-0.709712	0.238941	0.409119
AKT2	0.105792	1.1443	4	0.588943	0.27795	0.477824	RIPK2	0.200235	1.98492	1	0.480895	0.315295	0.47979	ATM	-0.14178	-0.595734	9	0.542695	0.29367	0.447638	PDPK1	-0.135833	-3.44385	5	-0.70615	0.240048	0.409119
CDK16	-0.473138	-5.11766	1	-0.565469	0.285877	0.482729	CDC7	0.0706485	0.700333	3	0.474475	0.317581	0.47979	ARAF	-0.440909	-1.85262	2	-0.539559	0.294751	0.447638	HIPK2	-0.120116	-3.04538	6	-0.704186	0.240659	0.409119
LATS2	0.274117	2.96496	1	0.5445	0.293049	0.482729	RAF1	0.0628846	0.62337	3	0.452998	0.325275	0.47979	PTK6	-0.524399	-2.20343	1	-0.538503	0.295115	0.447638	GTF2F1	-0.341723	-8.66391	1	-0.686761	0.246117	0.413801
STK38L	0.274117	2.96496	1	0.5445	0.293049	0.482729	PTK6	-0.366596	-3.63404	1	-0.424366	0.335649	0.47979	MAP2K4	0.0434316	0.182492	1	0.529135	0.298356	0.447638	PRKCE	-0.0829668	-2.10351	9	-0.661648	0.254099	0.422577
MAPK6	0.266517	2.88277	1	0.533212	0.296944	0.482729	SRPK1	0.163707	1.62281	1	0.422557	0.336309	0.47979	MAP2K6	0.0434316	0.182492	1	0.529135	0.298356	0.447638	RIPK2	0.39714	10.069	1	0.64448	0.259632	0.427137
PAK2	0.266517	2.88277	1	0.533212	0.296944	0.482729	CDK7	0.00675096	0.0669218	6	0.421043	0.336862	0.47979	MAP3K6	0.0434316	0.182492	1	0.529135	0.298356	0.447638	CDK5	0.130167	3.30021	14	0.611623	0.270393	0.434845
CLK1	-0.339557	-3.67279	2	-0.519085	0.301851	0.482729	MAP2K3	-0.283309	-2.80842	2	-0.412034	0.340157	0.47979	PDGFRA	0.043038	0.180838	1	0.528395	0.298613	0.447638	CDK2	0.0723643	1.8347	101	0.596133	0.275543	0.434845
MAP2K2	-0.337589	-3.65151	2	-0.514952	0.303293	0.482729	MAP3K5	-0.283309	-2.80842	2	-0.412034	0.340157	0.47979	PDGFRB	0.043038	0.180838	1	0.528395	0.298613	0.447638	EEF2K	-0.189331	-4.80023	2	-0.582925	0.279972	0.434845
PTK6	0.230461	2.49277	1	0.479654	0.315737	0.482729	MAP2K1	-0.214829	-2.12958	5	-0.40693	0.34203	0.47979	ROCK1	-0.0784709	-0.32972	3	0.519499	0.301706	0.447638	CSNK1D	0.265072	6.72054	2	0.574916	0.282674	0.434845
ALK	0.21972	2.37658	1	0.463699	0.321432	0.482729	CLK1	-0.278257	-2.75834	2	-0.400624	0.344348	0.47979	IKBKE	-0.0469288	-0.197186	2	0.50804	0.305713	0.447638	MET	-0.27274	-6.91495	1	-0.562472	0.286897	0.434845
FER	0.21972	2.37658	1	0.463699	0.321432	0.482729	MET	-0.348059	-3.45028	1	-0.394761	0.34651	0.47979	UHMK1	-0.081999	-0.344545	3	0.508009	0.305723	0.447638	STK3	-0.179733	-4.5569	2	-0.55847	0.288262	0.434845
PKM	0.21972	2.37658	1	0.463699	0.321432	0.482729	MAP3K7	0.0669267	0.663438	2	0.379001	0.352344	0.47979	MAPK14	-0.16188	-0.680189	12	0.495738	0.310039	0.447638	MTOR	0.108459	2.74982	18	0.527573	0.298898	0.434845
STK3	0.126617	1.36954	2	0.460191	0.32269	0.482729	MARK2	0.0669267	0.663438	2	0.379001	0.352344	0.47979	CAMK1G	-0.484746	-2.03681	1	-0.463948	0.321343	0.447638	NUAK1	0.331366	8.40133	1	0.525971	0.299454	0.434845
PRKAA1	-0.172644	-1.86739	14	-0.445692	0.32791	0.482729	MAP2K4	0.119999	1.18954	1	0.352753	0.362137	0.47979	PNCK	-0.484746	-2.03681	1	-0.463948	0.321343	0.447638	NLK	-0.247248	-6.26863	1	-0.516541	0.302738	0.434845
SRC	0.020618	0.223013	7	0.444364	0.32839	0.482729	MAP2K6	0.119999	1.18954	1	0.352753	0.362137	0.47979	MAPK9	-0.377528	-1.5863	3	-0.454413	0.324766	0.447638	LIMK1	-0.162022	-4.10786	2	-0.513341	0.303856	0.434845
PIM1	0.197749	2.13893	1	0.431063	0.333211	0.482729	MAP3K6	0.119999	1.18954	1	0.352753	0.362137	0.47979	STK3	-0.406796	-1.70928	2	-0.448852	0.326769	0.447638	LIMK2	-0.162022	-4.10786	2	-0.513341	0.303856	0.434845
PIM3	0.197749	2.13893	1	0.431063	0.333211	0.482729	BRAF	-0.224234	-2.22281	3	-0.341223	0.366468	0.47979	MAP2K3	-0.402789	-1.69244	2	-0.438195	0.330622	0.447638	IRAK4	-0.124201	-3.14894	3	-0.510682	0.304787	0.434845
CDK4	0.0515119	0.557175	4	0.427687	0.33444	0.482729	MAPK7	0.050071	0.49635	2	0.340931	0.366578	0.47979	MAP3K5	-0.402789	-1.69244	2	-0.438195	0.330622	0.447638	PRKAA2	-0.157173	-3.98491	2	-0.500985	0.308191	0.434845
CHEK1	-0.0284895	-0.308154	19	0.414137	0.339387	0.48409	PRKACA	-0.127726	-1.26614	61	-0.334884	0.368856	0.47979	ATR	-0.143734	-0.603944	6	0.43411	0.332104	0.447638	PRKCI	-0.11943	-3.02799	3	-0.495794	0.31002	0.434845
MAPK8	-0.185772	-2.00938	8	-0.392067	0.347505	0.48409	AKT2	-0.205272	-2.03485	4	-0.333445	0.369399	0.47979	NEK2	-0.0102179	-0.0429339	1	0.428262	0.33423	0.447638	STK39	-0.233459	-5.91903	1	-0.491697	0.311467	0.434845
MAPK13	0.0361722	0.391254	4	0.382116	0.351188	0.48409	LATS2	-0.304609	-3.01956	1	-0.325368	0.372451	0.47979	IRAK4	-0.106831	-0.448883	3	0.427142	0.334638	0.447638	GSK3B	-0.0191776	-0.486221	20	-0.472336	0.318344	0.434845
CAMK1G	0.16477	1.78222	1	0.382076	0.351202	0.48409	STK38L	-0.304609	-3.01956	1	-0.325368	0.372451	0.47979	CDK20	-0.459784	-1.93193	1	-0.417015	0.338334	0.447638	BLVRA	-0.218476	-5.53917	1	-0.464703	0.321072	0.434845
PNCK	0.16477	1.78222	1	0.382076	0.351202	0.48409	PIM1	0.0970684	0.962231	1	0.316132	0.375951	0.47979	SGK1	-0.165506	-0.695425	9	0.408868	0.341318	0.447638	MAPK7	0.221641	5.61941	2	0.464252	0.321234	0.434845
MAP2K4	-0.316098	-3.41905	1	-0.332203	0.369868	0.489846	PIM3	0.0970684	0.962231	1	0.316132	0.375951	0.47979	NLK	-0.445888	-1.87354	1	-0.390886	0.347941	0.447638	STK11	-0.0893887	-2.26633	4	-0.46424	0.321238	0.434845
MAP2K6	-0.316098	-3.41905	1	-0.332203	0.369868	0.489846	MAP2K2	0.0316509	0.313752	2	0.299328	0.382345	0.47979	BRAF	-0.357482	-1.50208	3	-0.389133	0.348589	0.447638	CDC7	-0.105894	-2.68479	3	-0.453551	0.325076	0.434845
MAP3K6	-0.316098	-3.41905	1	-0.332203	0.369868	0.489846	CDK14	-0.230787	-2.28777	2	-0.293408	0.384605	0.47979	CSNK1D	-0.0921615	-0.387246	2	0.387766	0.349095	0.447638	SRPK1	0.265376	6.72826	1	0.407076	0.341976	0.434845
PRKDC	-0.214032	-2.31506	3	-0.312798	0.377217	0.489846	LATS1	0.0261887	0.259606	2	0.286991	0.38706	0.47979	PRKDC	-0.351396	-1.4765	3	-0.369313	0.355947	0.447638	CSNK1A1	0.151638	3.84457	4	0.404296	0.342997	0.434845
PLK1	-0.166562	-1.80161	8	-0.311363	0.377762	0.489846	LMTK2	0.0170764	0.169277	2	0.26641	0.394962	0.47979	EEF2K	-0.372624	-1.5657	2	-0.357988	0.360176	0.447638	CAMKK1	-0.177924	-4.51103	1	-0.391638	0.347663	0.434845
GTF2F1	-0.301679	-3.26309	1	-0.310785	0.377982	0.489846	PRKAA2	-0.218116	-2.16217	2	-0.264791	0.395585	0.47979	RPS6KB2	-0.427682	-1.79704	1	-0.356656	0.360675	0.447638	DYRK2	0.125678	3.18641	6	0.380591	0.351753	0.434845
RPS6KB2	0.0991768	1.07274	1	0.284645	0.387958	0.489846	RPS6KB2	0.0643584	0.637979	1	0.263892	0.395931	0.47979	CDK16	-0.427371	-1.79573	1	-0.356071	0.360894	0.447638	NEK9	-0.171502	-4.3482	1	-0.380067	0.351948	0.434845
PRKCQ	-0.187337	-2.02632	4	-0.281884	0.389016	0.489846	JAK3	0.0603243	0.59799	1	0.25745	0.398416	0.47979	CDK7	-0.314406	-1.32108	6	-0.351928	0.362446	0.447638	PRKCQ	-0.0598694	-1.51791	4	-0.357867	0.360221	0.434845
GSK3B	-0.056373	-0.609754	20	0.239669	0.405293	0.489846	SYK	0.0603243	0.59799	1	0.25745	0.398416	0.47979	ALK	-0.425011	-1.78582	1	-0.351634	0.362556	0.447638	TBK1	-0.10017	-2.53967	2	-0.355738	0.361018	0.434845
CSNK2A2	-0.203409	-2.20016	2	-0.233085	0.407848	0.489846	PRKCG	-0.213574	-2.11714	2	-0.254531	0.399543	0.47979	FER	-0.425011	-1.78582	1	-0.351634	0.362556	0.447638	PKN1	0.233894	5.93005	1	0.350351	0.363037	0.434845
ATM	-0.0452102	-0.489013	9	0.210518	0.416632	0.489846	ATR	-0.0380751	-0.377435	6	0.245685	0.402963	0.47979	PKM	-0.425011	-1.78582	1	-0.351634	0.362556	0.447638	MAP2K4	-0.153805	-3.89952	1	-0.348182	0.363852	0.434845
RIPK2	0.0407851	0.441149	1	0.19791	0.421558	0.489846	MAPK11	-0.166805	-1.65353	5	-0.235432	0.406937	0.47979	PAK1	-0.191719	-0.80557	16	0.34801	0.363916	0.447638	MAP2K6	-0.153805	-3.89952	1	-0.348182	0.363852	0.434845
ROCK1	-0.0208398	-0.225412	3	0.184243	0.426912	0.489846	PDK1	-0.183669	-1.82069	3	-0.229013	0.409429	0.47979	CAMKK1	-0.420224	-1.76571	1	-0.342634	0.365937	0.447638	MAP3K6	-0.153805	-3.89952	1	-0.348182	0.363852	0.434845
CDC7	-0.163873	-1.77252	3	-0.183751	0.427105	0.489846	PDK2	-0.183669	-1.82069	3	-0.229013	0.409429	0.47979	PRKCG	-0.110905	-0.466002	2	0.337927	0.367709	0.447638	MAPK14	-0.0158461	-0.401756	12	-0.345077	0.365018	0.434845
SRPK1	0.0266485	0.288242	1	0.176911	0.429789	0.489846	TBK1	-0.201553	-1.99798	2	-0.227381	0.410064	0.47979	TESK1	-0.0595813	-0.25035	1	0.335449	0.368643	0.447638	PLK2	0.173054	4.38754	2	0.340449	0.366759	0.434845
PRKG2	-0.173013	-1.87138	2	-0.169232	0.432807	0.489846	CDK19	-0.229375	-2.27377	1	-0.205216	0.418702	0.47979	CDK1	-0.220098	-0.924812	79	0.299042	0.382454	0.45854	CDK7	0.113101	2.86753	6	0.325084	0.372559	0.434845
BLVRA	0.0213285	0.230698	1	0.169009	0.432895	0.489846	CDK16	-0.228897	-2.26903	1	-0.204452	0.419	0.47979	MAP3K7	-0.132018	-0.554715	2	0.281787	0.389053	0.45854	CSNK2B	0.215531	5.46451	1	0.317268	0.37552	0.434845
MAP3K7	-0.012603	-0.13632	2	0.167736	0.433395	0.489846	PDPK1	-0.149664	-1.4836	5	-0.174218	0.430847	0.47979	MARK2	-0.132018	-0.554715	2	0.281787	0.389053	0.45854	NEK2	-0.130739	-3.3147	1	-0.306622	0.379566	0.434845
MARK2	-0.012603	-0.13632	2	0.167736	0.433395	0.489846	MAPK8	-0.137306	-1.3611	8	-0.164548	0.43465	0.47979	HIPK2	-0.177123	-0.744237	6	0.280338	0.389609	0.45854	IRAK1	-0.129345	-3.27936	1	-0.30411	0.380522	0.434845
CAMK1	-0.171659	-1.85674	2	-0.166387	0.433926	0.489846	CAMKK1	-0.000449424	-0.00445511	1	0.160391	0.436287	0.47979	BLVRA	-0.361425	-1.51864	1	-0.23208	0.408238	0.473578	NEK6	-0.129345	-3.27936	1	-0.30411	0.380522	0.434845
CSNK2A1	-0.106091	-1.14753	59	-0.15562	0.438166	0.489846	CHEK2	-0.158664	-1.57282	3	-0.159844	0.436502	0.47979	ULK1	-0.169212	-0.710996	3	0.223992	0.411382	0.473578	MAP2K1	-0.0358814	-0.909723	5	-0.303464	0.380768	0.434845
CDK20	0.00264147	0.0285713	1	0.141251	0.443836	0.489846	IRAK4	-0.0432548	-0.428781	3	0.159398	0.436678	0.47979	RIPK2	-0.119258	-0.501102	1	0.223244	0.411673	0.473578	PLK3	-0.0574991	-1.45781	3	-0.302525	0.381126	0.434845
CDK7	-0.0542832	-0.58715	6	0.138876	0.444774	0.489846	ATM	-0.132963	-1.31805	9	-0.153722	0.438914	0.47979	RAF1	-0.182946	-0.768707	3	0.179263	0.428865	0.48504	RPS6KB2	-0.125847	-3.19069	1	-0.297809	0.382924	0.434845
CAMKK1	-0.179223	-1.93855	1	-0.128889	0.448723	0.489846	AURKA	-0.00473156	-0.0469036	1	0.153552	0.438982	0.47979	PRKD1	-0.212772	-0.894028	13	0.170975	0.432122	0.48504	CDK19	-0.123673	-3.13556	1	-0.293892	0.38442	0.434845
STK11	-0.135463	-1.46523	4	-0.127778	0.449162	0.489846	PRKDC	-0.153973	-1.52632	3	-0.14687	0.441617	0.47979	CDC7	-0.187604	-0.788279	3	0.164094	0.434829	0.48504	MAPK1	0.0638501	1.61883	43	0.288376	0.386529	0.434845
MAPK1	-0.0794713	-0.859595	43	0.126437	0.449693	0.489846	MAPK1	-0.0868799	-0.861233	43	0.146601	0.441723	0.47979	CDK4	-0.279538	-1.17457	4	-0.156229	0.437926	0.48504	MAPK3	0.057042	1.44622	43	0.20794	0.417638	0.458181
JAK2	-0.134432	-1.45408	4	-0.124715	0.450375	0.489846	CSNK2A2	-0.163766	-1.6234	2	-0.142037	0.443525	0.47979	PRKAA2	-0.292431	-1.22874	2	-0.144753	0.442453	0.48504	MAPK9	-0.0249177	-0.631755	3	-0.200848	0.420409	0.458181
PRKACA	-0.0819891	-0.886829	61	0.121383	0.451694	0.489846	MAPK3	-0.0873249	-0.865645	43	0.141941	0.443563	0.47979	LATS1	-0.184646	-0.775849	2	0.141848	0.4436	0.48504	MAP3K8	-0.0185821	-0.471124	3	-0.181077	0.428154	0.458181
PLK3	-0.136442	-1.47582	3	-0.113178	0.454945	0.489846	MTOR	-0.0821237	-0.814086	18	0.127077	0.44944	0.47979	CDK14	-0.291122	-1.22324	2	-0.141272	0.443828	0.48504	CAMK1G	-0.0566204	-1.43553	1	-0.17308	0.431294	0.458181
TESK1	-0.0180566	-0.195308	1	0.110507	0.456004	0.489846	NEK9	-0.178898	-1.77341	1	-0.124602	0.450419	0.47979	GSK3B	-0.252387	-1.06048	20	-0.121038	0.45183	0.489741	PNCK	-0.0566204	-1.43553	1	-0.17308	0.431294	0.458181
AURKB	-0.114418	-1.23759	10	-0.103177	0.458911	0.489846	LIMK1	-0.0461913	-0.45789	2	0.123515	0.45085	0.47979	PLK2	-0.280949	-1.1805	2	-0.114222	0.454531	0.489741	CDK16	0.134499	3.41005	1	0.171269	0.432006	0.458181
CLK2	-0.156315	-1.69077	1	-0.0948623	0.462212	0.489846	LIMK2	-0.0461913	-0.45789	2	0.123515	0.45085	0.47979	STK11	-0.263694	-1.10799	4	-0.0966477	0.461503	0.490211	MAP2K2	0.101453	2.57221	2	0.158008	0.437225	0.458181
MTOR	-0.107217	-1.1597	18	-0.0930477	0.462933	0.489846	CSNK1D	-0.0469938	-0.465846	2	0.121703	0.451567	0.47979	CDK19	-0.282323	-1.18627	1	-0.0833508	0.466786	0.490211	DYRK1A	-0.0477062	-1.20953	1	-0.157019	0.437615	0.458181
MAPK3	-0.0832351	-0.900307	43	0.0897757	0.464233	0.489846	PRKD3	-0.140291	-1.3907	2	-0.0890169	0.464534	0.485614	PKN1	-0.194987	-0.8193	1	0.0808585	0.467777	0.490211	LATS1	-0.0208631	-0.528955	2	-0.15366	0.438939	0.458181
AKT1	-0.100192	-1.08372	33	-0.0660468	0.47367	0.492191	DYRK2	-0.0789209	-0.782336	6	0.0858976	0.465774	0.485614	PRKCI	-0.213606	-0.897532	3	0.0794173	0.46835	0.490211	PDGFRA	0.122933	3.11679	1	0.150428	0.440213	0.458181
DYRK2	-0.0773847	-0.837026	6	0.0548218	0.47814	0.492191	NUAK1	-0.153409	-1.52073	1	-0.0838947	0.46657	0.485614	MTOR	-0.247117	-1.03834	18	-0.0727891	0.470987	0.490211	PDGFRB	0.122933	3.11679	1	0.150428	0.440213	0.458181
SGK1	-0.103657	-1.1212	9	-0.0499304	0.480089	0.492191	RET	-0.0818107	-0.810983	4	0.0609046	0.475718	0.491789	HCK	-0.218889	-0.919731	3	0.0622122	0.475197	0.491251	ROCK1	0.00338016	0.0856995	3	-0.112539	0.455198	0.470576
ULK1	-0.0742202	-0.802797	3	0.0469064	0.481294	0.492191	PRKD1	-0.108625	-1.07679	13	-0.0446082	0.48221	0.491852	CDK6	-0.252577	-1.06128	1	-0.0274222	0.489061	0.49681	FYN	-0.0170243	-0.431627	1	-0.101738	0.459482	0.471818
PKN1	-0.0629784	-0.681201	1	0.0437799	0.48254	0.492191	ARAF	-0.0841662	-0.834333	2	0.037746	0.484945	0.491852	SRC	-0.242675	-1.01968	7	-0.0232961	0.490707	0.49681	CAMK2D	0.0644558	1.63419	1	0.0450683	0.482026	0.490161
HCK	-0.0839611	-0.908159	3	0.0218451	0.491286	0.497596	HCK	-0.114091	-1.13097	3	-0.0365482	0.485423	0.491852	SRPK1	-0.225968	-0.949475	1	0.0226088	0.490981	0.49681	MAPK13	0.0294884	0.747639	4	-0.0358678	0.485694	0.490161
CDK19	-0.0829064	-0.896751	1	0.014179	0.494344	0.497596	MAPK9	-0.106596	-1.05668	3	-0.015817	0.49369	0.494713	CSNK1A1	-0.235077	-0.987753	4	0.0109608	0.495627	0.49681	LMTK2	0.0522752	1.32537	2	0.0326994	0.486957	0.490161
PRKAA2	-0.0923484	-0.99888	2	0.00021756	0.499913	0.499913	JAK2	-0.0967293	-0.958869	4	0.0132531	0.494713	0.494713	CSNK2B	-0.233739	-0.98213	1	0.00799654	0.49681	0.49681	PRKD3	0.0459544	1.16511	2	0.0165937	0.49338	0.49338

## Sheet: Sheet3
The list of CCA-associated PKs predicted by enrichment-based method.
ID	Position	Code	Peptide	M.ID	Gene Name	Kinase ID	Kinase	Interaction	Predictor	Score	Cutoff		Summary
P02533	213	S	TELNLRMSVEADING	P02533	KRT14	Q1KKQ2	PKD1	String	CAMK/PKD	5	1.76		ALK1
P08727	178	S	TEQALRMSVEADING	P08727	KRT19	Q1KKQ2	PKD1	String	CAMK/PKD	3.9	1.76		AurC
P08727	315	S	IELQSQLSMKAALED	P08727	KRT19	Q1KKQ2	PKD1	String	CAMK/PKD	1.8	1.76		BCKDK
P08727	297	T	QMSRSEVTDLRRTLQ	P08727	KRT19	Q1KKQ2	PKD1	String	CAMK/PKD	2	1.76		CK1a
O14745	290	S	PALVRSASSDTSEEL	O14745	SLC9A3R1	Q1KKQ2	PKD1	String	CAMK/PKD	3.7	1.76		CK1a2
O14827	746	S	PVRARKLSLTSPLNS	O14827	RASGRF2	Q1KKQ2	PKD1	String	CAMK/PKD	5.7	1.76		CK1d
O14936	582	S	SSSCERDSPSTSRQS	O14936	CASK	Q1KKQ2	PKD1	Exp.&String	CAMK/PKD	2.1	1.76		CK1e
O15061	1044	S	ESLSRQRSPAPGSPD	O15061	SYNM	Q1KKQ2	PKD1	String	CAMK/PKD	3.7	1.76		CK1g1
O15061	429	S	QTNVRTFSPTYGLLR	O15061	SYNM	Q1KKQ2	PKD1	String	CAMK/PKD	1.8	1.76		CK1g2
O43707	507	S	DQWDALGSLTHSRRE	P35609	ACTN2	Q1KKQ2	PKD1	String	CAMK/PKD	1.8	1.76		CK1g3
O60664	130	S	ELVSSKVSGAQEMVS	O60664	PLIN3	Q1KKQ2	PKD1	String	CAMK/PKD	3.1	1.76		CK2a1
O75563	47	S	KAKEKRESLIKKIKD	O75563	SKAP2	Q1KKQ2	PKD1	String	CAMK/PKD	6	1.76		CK2a2
O94776	435	S	RPEAQSLSPYTTSAN	O94776	MTA2	Q1KKQ2	PKD1	String	CAMK/PKD	2.9	1.76		LATS1
Q15139	397	S	EDANRTISPSTSNNI	O94806	PKD3	Q1KKQ2	PKD1	Exp.	CAMK/PKD	2	1.76		PDHK3
Q15139	205	S	GVRRRRLSNVSLTGV	O94806	PKD3	Q1KKQ2	PKD1	Exp.	CAMK/PKD	17.6	1.76		PKACg
Q9BZL6	197	S	GARKRRLSSTSLASG	O94806	PKD3	Q1KKQ2	PKD1	Exp.	CAMK/PKD	12.2	1.76		PKCa
P00533	1166	S	QKGSHQISLDNPDYQ	P00533	EGFR	Q1KKQ2	PKD1	Exp.&String	CAMK/PKD	2.8	1.76		PKCb
P04792	82	S	RALSRQLSSGVSEIR	P04792	HSPB1	Q1KKQ2	PKD1	String	CAMK/PKD	12.4	1.76		PKCd
P05783	177	S	TELAMRQSVENDIHG	C9JEA8	N/A	Q1KKQ2	PKD1	String	CAMK/PKD	5.1	1.76		PKCe
P07900	231	S	KERDKEVSDDEAEEK	P07900	HSP90AA1	Q1KKQ2	PKD1	String	CAMK/PKD	2.2	1.76		PKCg
P07900	476	S	ASGDEMVSLKDYCTR	P07900	HSP90AA1	Q1KKQ2	PKD1	String	CAMK/PKD	2.1	1.76		PKCh
P08670	73	S	SAVRLRSSVPGVRLL	P08670	VIM	Q1KKQ2	PKD1	String	CAMK/PKD	4.5	1.76		PKCt
P08670	202	T	QREEAENTLQSFRQD	P08670	VIM	Q1KKQ2	PKD1	String	CAMK/PKD	2	1.76		PKCz
P08670	327	T	RRQVQSLTCEVDALK	P08670	VIM	Q1KKQ2	PKD1	String	CAMK/PKD	3	1.76		PKD2
Q9BYX7	33	S	APQAVFPSIVGRPRH	Q9BYX7	ACTBL3	Q1KKQ2	PKD1	String	CAMK/PKD	1.9	1.76		PKD3
P11171	709	S	SEWDKRLSTHSPFRT	P11171	EPB41	Q1KKQ2	PKD1	String	CAMK/PKD	2.7	1.76		PKN1
P11171	542	S	ASKRASRSLDGAAAV	P11171	EPB41	Q1KKQ2	PKD1	String	CAMK/PKD	2.3	1.76		PKN2
P12931	17	S	DASQRRRSLEPAENV	P12931	SRC	Q1KKQ2	PKD1	Exp.&String	CAMK/PKD	4.6	1.76		PKN3
P13797	339	S	DDLKRAESMLQQADK	P13797	PLS3	Q1KKQ2	PKD1	String	CAMK/PKD	1.9	1.76		TIE1
P15336	112	S	KKMPLDLSPLATPII	P15336	ATF2	Q1KKQ2	PKD1	String	CAMK/PKD	2.6	1.76		TIE2
P15924	165	S	VPRVRRASSKGGGGY	P15924	DSP	Q1KKQ2	PKD1	String	CAMK/PKD	4	1.76		TTBK1
P15924	2209	S	SVQKRSMSFQGIRQP	P15924	DSP	Q1KKQ2	PKD1	String	CAMK/PKD	2.1	1.76		TTBK2
P16157	1684	T	QRGQARITHSPTVSQ	P16157	ANK1	Q1KKQ2	PKD1	String	CAMK/PKD	2	1.76		VRK1
P16157	1378	T	GAEDRRRTPTPLALR	P16157	ANK1	Q1KKQ2	PKD1	String	CAMK/PKD	3.9	1.76		VRK2
P16284	653	S	NSNNEKMSDPNMEAN	P16284	PECAM1	Q1KKQ2	PKD1	String	CAMK/PKD	2.2	1.76		VRK3
P17252	497	T	MDGVTTRTFCGTPDY	P17252	PKCa	Q1KKQ2	PKD1	String	CAMK/PKD	2.1	1.76		YANK1
P17302	372	S	SRASSRASSRPRPDD	P17302	GJA1	Q1KKQ2	PKD1	String	CAMK/PKD	2.9	1.76		YANK3
P17302	373	S	RASSRASSRPRPDDL	P17302	GJA1	Q1KKQ2	PKD1	String	CAMK/PKD	1.9	1.76
P17302	364	S	AIVDQRPSSRASSRA	P17302	GJA1	Q1KKQ2	PKD1	String	CAMK/PKD	2.5	1.76
P17302	368	S	QRPSSRASSRASSRP	P17302	GJA1	Q1KKQ2	PKD1	String	CAMK/PKD	4.5	1.76
P18206	275	S	RALASIDSKLNQAKG	P18206	VCL	Q1KKQ2	PKD1	String	CAMK/PKD	2.8	1.76
P18206	809	S	KAVAGNISDPGLQKS	P18206	VCL	Q1KKQ2	PKD1	String	CAMK/PKD	2.8	1.76
P18206	346	S	RARGQGSSPVAMQKA	P18206	VCL	Q1KKQ2	PKD1	String	CAMK/PKD	2.8	1.76
P18206	600	S	QEVSDVFSDTTTPIK	P18206	VCL	Q1KKQ2	PKD1	String	CAMK/PKD	2	1.76
P18206	795	S	DELSKTISPMVMDAK	P18206	VCL	Q1KKQ2	PKD1	String	CAMK/PKD	4.5	1.76
P19634	599	S	GGMGKIPSAVSTVSM	P19634	SLC9A1	Q1KKQ2	PKD1	String	CAMK/PKD	3.1	1.76
P27448	419	S	SQKQRRYSDHAGPAI	P27448	MARK3	Q1KKQ2	PKD1	String	CAMK/PKD	4.5	1.76
P27448	507	T	GGMTRRNTYVCSERT	P27448	MARK3	Q1KKQ2	PKD1	String	CAMK/PKD	5.1	1.76
P29474	633	S	WRRKRKESSNTDSAG	P29474	NOS3	Q1KKQ2	PKD1	String	CAMK/PKD	2.4	1.76
P29474	634	S	RRKRKESSNTDSAGA	P29474	NOS3	Q1KKQ2	PKD1	String	CAMK/PKD	4	1.76
P29474	114	S	RKLQGRPSPGPPAPE	P29474	NOS3	Q1KKQ2	PKD1	String	CAMK/PKD	2.2	1.76
P30086	52	S	QVKNRPTSISWDGLD	P30086	PEBP1	Q1KKQ2	PKD1	String	CAMK/PKD	2.3	1.76
P35222	552	S	QDTQRRTSMGGTQQQ	B5BU28	CTNNB1	Q1KKQ2	PKD1	String	CAMK/PKD	5.4	1.76
P35568	329	S	GSFRVRASSDGEGTM	P35568	IRS1	Q1KKQ2	PKD1	String	CAMK/PKD	2.4	1.76
P35568	862	S	LARPTRLSLGDPKAS	P35568	IRS1	Q1KKQ2	PKD1	String	CAMK/PKD	3.8	1.76
P35568	527	S	RFRKRTHSAGTSPTI	P35568	IRS1	Q1KKQ2	PKD1	String	CAMK/PKD	3.9	1.76
P35579	1114	S	RELESQISELQEDLE	P35579	MYH9	Q1KKQ2	PKD1	String	CAMK/PKD	6.4	1.76
P42345	1261	S	PMKKLHVSTINLQKA	P42345	FRAP	Q1KKQ2	PKD1	String	CAMK/PKD	2.3	1.76
P42345	2448	S	RSRTRTDSYSAGQSV	P42345	FRAP	Q1KKQ2	PKD1	String	CAMK/PKD	1.8	1.76
P46108	40	S	GVFLVRDSSTSPGDY	P46108	CRK	Q1KKQ2	PKD1	String	CAMK/PKD	2.1	1.76
P46108	125	S	VSRSRQGSGVILRQE	P46108	CRK	Q1KKQ2	PKD1	String	CAMK/PKD	3.1	1.76
P47712	727	S	RQNPSRCSVSLSNVE	P47712	PLA2G4A	Q1KKQ2	PKD1	String	CAMK/PKD	4.6	1.76
P49815	1411	S	KADVGRLSPEVKARS	P49815	TSC2	Q1KKQ2	PKD1	String	CAMK/PKD	2.6	1.76
P49815	1254	S	TALYKSLSVPAASTA	P49815	TSC2	Q1KKQ2	PKD1	String	CAMK/PKD	4.9	1.76
P49815	1387	S	QPLSKSSSSPELQTL	P49815	TSC2	Q1KKQ2	PKD1	String	CAMK/PKD	3.8	1.76
P49815	1371	S	SSEGGRPSVDLSFQP	P49815	TSC2	Q1KKQ2	PKD1	String	CAMK/PKD	2	1.76
P49840	21	S	SGRARTSSFAEPGGG	D3DN89	GSK3B	Q1KKQ2	PKD1	Exp.&String	CAMK/PKD	1.8	1.76
P56524	467	S	RPLGRTQSAPLPQNA	P56524	HDAC4	Q1KKQ2	PKD1	String	CAMK/PKD	4.7	1.76
P57737	806	S	RCLRLRQSSLEPVAF	P57737	CORO7	Q1KKQ2	PKD1	String	CAMK/PKD	5.4	1.76
P57737	21	S	ARPPRRESWISDIRA	P57737	CORO7	Q1KKQ2	PKD1	String	CAMK/PKD	1.8	1.76
Q00610	576	S	ALKNNRPSEGPLQTR	Q00610	CLTC	Q1KKQ2	PKD1	String	CAMK/PKD	2	1.76
Q00610	67	S	NPIRRPISADSAIMN	Q00610	CLTC	Q1KKQ2	PKD1	String	CAMK/PKD	3.3	1.76
Q02952	248	S	ETLKREQSHAEISPP	Q02952	AKAP12	Q1KKQ2	PKD1	String	CAMK/PKD	3	1.76
Q02952	371	S	SAHEPRLSAEYEKVE	Q02952	AKAP12	Q1KKQ2	PKD1	String	CAMK/PKD	5.2	1.76
Q02952	696	S	KKRARRGSSSDEEGG	Q02952	AKAP12	Q1KKQ2	PKD1	String	CAMK/PKD	6	1.76
Q02952	627	S	KKRVRRPSESDKEDE	Q02952	AKAP12	Q1KKQ2	PKD1	String	CAMK/PKD	3.8	1.76
Q02952	644	S	KVKSATLSSTESTAS	Q02952	AKAP12	Q1KKQ2	PKD1	String	CAMK/PKD	4.5	1.76
Q03135	37	S	KAMADELSEKQVYDA	Q03135	CAV1	Q1KKQ2	PKD1	String	CAMK/PKD	4.6	1.76
Q05655	304	S	RASRRSDSASSEPVG	Q05655	PKCd	Q1KKQ2	PKD1	String	CAMK/PKD	2.3	1.76
Q05682	783	S	RNLWEKQSVDKVTSP	Q05682	CALD1	Q1KKQ2	PKD1	String	CAMK/PKD	3	1.76
Q05682	202	S	EEKPKRGSIGENQVE	Q05682	CALD1	Q1KKQ2	PKD1	String	CAMK/PKD	4	1.76
Q06187	55	S	RRGSKKGSIDVEKIT	Q06187	BTK	Q1KKQ2	PKD1	Exp.&String	CAMK/PKD	2	1.76
Q07157	927	S	QQKAEASSPVPYLSP	Q07157	TJP1	Q1KKQ2	PKD1	String	CAMK/PKD	1.8	1.76
Q07157	617	S	SKRNLRKSREDLSAQ	Q07157	TJP1	Q1KKQ2	PKD1	String	CAMK/PKD	4.7	1.76
Q07157	622	S	RKSREDLSAQPVQTK	Q07157	TJP1	Q1KKQ2	PKD1	String	CAMK/PKD	2	1.76
Q12802	1559	S	RSSMRSLSPFRRHSW	A8MVN0	AKAP13	Q1KKQ2	PKD1	String	CAMK/PKD	1.8	1.76
Q12802	2563	S	RALTRSLSRPSSLIE	A8MVN0	AKAP13	Q1KKQ2	PKD1	String	CAMK/PKD	7.1	1.76
Q12802	2567	S	RSLSRPSSLIEQEKQ	A8MVN0	AKAP13	Q1KKQ2	PKD1	String	CAMK/PKD	5.9	1.76
Q12802	1645	S	ERVDSLVSLSEEDLE	A8MVN0	AKAP13	Q1KKQ2	PKD1	String	CAMK/PKD	2.4	1.76
Q12802	2411	T	RVLFRSNTEEALKGG	A8MVN0	AKAP13	Q1KKQ2	PKD1	String	CAMK/PKD	2.2	1.76
Q13330	449	S	GPNRSNMSPHGLPAR	Q13330	MTA1	Q1KKQ2	PKD1	String	CAMK/PKD	3.7	1.76
Q13393	505	S	GSVKRVTSGPSLGSL	Q13393	PLD1	Q1KKQ2	PKD1	String	CAMK/PKD	3.5	1.76
Q13555	419	S	AGMQPQPSLCSSAMR	Q5SWX3	CAMK2G	Q1KKQ2	PKD1	String	CAMK/PKD	2.4	1.76
Q14155	249	S	KASEKPVSPKSGTLK	Q14155	ARHGEF7	Q1KKQ2	PKD1	String	CAMK/PKD	2.4	1.76
Q14155	518	S	LSASPRMSGFIYQGK	Q14155	ARHGEF7	Q1KKQ2	PKD1	String	CAMK/PKD	3.2	1.76
Q15052	488	S	LSASPRMSGFIYQGK	Q14155	ARHGEF7	Q1KKQ2	PKD1	String	CAMK/PKD	3.2	1.76
Q14573	1834	S	KGRVASFSIPGSSSR	Q14573	ITPR3	Q1KKQ2	PKD1	String	CAMK/PKD	1.8	1.76
Q14573	1843	S	PGSSSRYSLGPSLRR	Q14573	ITPR3	Q1KKQ2	PKD1	String	CAMK/PKD	3.9	1.76
Q14643	1598	S	RNAARRDSVLAASRD	Q14643	ITPR1	Q1KKQ2	PKD1	String	CAMK/PKD	7	1.76
Q14643	1764	S	RPSGRRESLTSFGNG	Q14643	ITPR1	Q1KKQ2	PKD1	String	CAMK/PKD	4	1.76
Q15746	1772	S	SGLSGRKSSTGSPTS	Q15746	smMLCK	Q1KKQ2	PKD1	String	CAMK/PKD	7.3	1.76
Q15746	1773	S	GLSGRKSSTGSPTSP	Q15746	smMLCK	Q1KKQ2	PKD1	String	CAMK/PKD	3.5	1.76
Q15746	1570	S	IKYMRQISEGVEYIH	Q15746	smMLCK	Q1KKQ2	PKD1	String	CAMK/PKD	2.4	1.76
Q15746	1209	S	KSRRPKSSLPPVLGT	Q15746	smMLCK	Q1KKQ2	PKD1	String	CAMK/PKD	3.2	1.76
Q16512	380	S	GSLSGRSSLKAEAEN	Q16512	PKN1	Q1KKQ2	PKD1	String	CAMK/PKD	5.6	1.76
Q5TBA9	1955	S	KLTASRKSTGQLNMN	Q5TBA9	FRY	Q1KKQ2	PKD1	String	CAMK/PKD	2.6	1.76
Q8WUI4	486	S	RPLSRAQSSPAAPAS	Q8WUI4	HDAC7	Q1KKQ2	PKD1	Exp.&String	CAMK/PKD	5.5	1.76
Q8WUI4	181	S	NPLLRKESAPPSLRR	Q8WUI4	HDAC7	Q1KKQ2	PKD1	Exp.&String	CAMK/PKD	3	1.76
Q8WUI4	185	S	RKESAPPSLRRRPAE	Q8WUI4	HDAC7	Q1KKQ2	PKD1	Exp.&String	CAMK/PKD	2.1	1.76
Q8WUI4	155	S	FPLRKTVSEPNLKLR	Q8WUI4	HDAC7	Q1KKQ2	PKD1	Exp.&String	CAMK/PKD	2.2	1.76
Q92918	374	S	SSPRKQLSESSDDDY	Q92918	HPK1	Q1KKQ2	PKD1	String	CAMK/PKD	2.5	1.76
Q969G5	62	S	GSVRRIQSGLGALSR	Q969G5	PRKCDBP	Q1KKQ2	PKD1	String	CAMK/PKD	2.4	1.76
Q96HC4	137	S	RPFGSVSSPKVTSIP	Q96HC4	PDLIM5	Q1KKQ2	PKD1	String	CAMK/PKD	1.9	1.76
Q96IZ0	108	S	AAPGPRRSEDEPPAA	Q96IZ0	PAWR	Q1KKQ2	PKD1	String	CAMK/PKD	1.9	1.76
Q96PY6	1052	S	PKMLRTCSLPDLSKL	Q96PY6	NEK1	Q1KKQ2	PKD1	String	CAMK/PKD	1.9	1.76
Q9NR12	78	S	RACGERLSLGLSRAQ	Q9NR12	PDLIM7	Q1KKQ2	PKD1	Exp.&String	CAMK/PKD	9.8	1.76
Q9NR12	260	S	TPLQSRTSIVQAAAG	Q9NR12	PDLIM7	Q1KKQ2	PKD1	Exp.&String	CAMK/PKD	6.3	1.76
Q9P2M7	332	S	TSVRRKVSLVLEKMQ	B9EK46	CGN	Q1KKQ2	PKD1	String	CAMK/PKD	6.4	1.76
Q9P2M7	131	S	GKLLRSHSQASLAGP	B9EK46	CGN	Q1KKQ2	PKD1	String	CAMK/PKD	4.9	1.76
Q9UBF8	511	S	GDIRRRLSEQLAHTP	Q9UBF8	PI4KB	Q1KKQ2	PKD1	String	CAMK/PKD	6.1	1.76
Q9UDY2	978	S	AQMRRAASSDQLRDN	Q9UDY2	TJP2	Q1KKQ2	PKD1	String	CAMK/PKD	2.4	1.76
Q9UDY2	192	S	RSRERDLSRDRSRGR	Q9UDY2	TJP2	Q1KKQ2	PKD1	String	CAMK/PKD	5.4	1.76
Q9UDY2	196	S	RDLSRDRSRGRSLER	Q9UDY2	TJP2	Q1KKQ2	PKD1	String	CAMK/PKD	4.1	1.76
Q9UDY2	244	S	RDRSRGRSIDQDYER	Q9UDY2	TJP2	Q1KKQ2	PKD1	String	CAMK/PKD	2.2	1.76
Q9UI08	259	S	KSDANRASSGGGGGG	Q9UI08	EVL	Q1KKQ2	PKD1	String	CAMK/PKD	2.3	1.76
Q9UKA4	18	S	TKASVRKSFSEDVFQ	Q9UKA4	AKAP11	Q1KKQ2	PKD1	String	CAMK/PKD	2.9	1.76
Q9Y2D5	720	S	SRKQRTLSMIEEEIR	B4E2K2	N/A	Q1KKQ2	PKD1	String	CAMK/PKD	3.7	1.76
Q9Y5P4	126	S	SGYGSESSLRRHGSM	B3KUB7	COL4A3BP	Q1KKQ2	PKD1	String	CAMK/PKD	2.2	1.76
O14939	76	T	VVGTERYTSGSKVGT	O14939	PLD2	Q1KKQ2	PKD1	String	CAMK/PKD	2.2	1.76
P05129	514	T	FPGTTTRTFCGTPDY	P05129	PKCg	Q1KKQ2	PKD1	String	CAMK/PKD	2.1	1.76
O14745	290	S	PALVRSASSDTSEEL	O14745	SLC9A3R1	Q9BZL6	PKD2	String	CAMK/PKD	3.7	1.76
O14936	582	S	SSSCERDSPSTSRQS	O14936	CASK	Q9BZL6	PKD2	Exp.&String	CAMK/PKD	2.1	1.76
O60664	130	S	ELVSSKVSGAQEMVS	O60664	PLIN3	Q9BZL6	PKD2	String	CAMK/PKD	3.1	1.76
Q9BZL6	197	S	GARKRRLSSTSLASG	O94806	PKD3	Q9BZL6	PKD2	Exp.	CAMK/PKD	12.2	1.76
P00533	1166	S	QKGSHQISLDNPDYQ	P00533	EGFR	Q9BZL6	PKD2	String	CAMK/PKD	2.8	1.76
P05783	177	S	TELAMRQSVENDIHG	C9JEA8	N/A	Q9BZL6	PKD2	String	CAMK/PKD	5.1	1.76
P08670	73	S	SAVRLRSSVPGVRLL	P08670	VIM	Q9BZL6	PKD2	String	CAMK/PKD	4.5	1.76
P08670	202	T	QREEAENTLQSFRQD	P08670	VIM	Q9BZL6	PKD2	String	CAMK/PKD	2	1.76
P08670	327	T	RRQVQSLTCEVDALK	P08670	VIM	Q9BZL6	PKD2	String	CAMK/PKD	3	1.76
P11171	709	S	SEWDKRLSTHSPFRT	P11171	EPB41	Q9BZL6	PKD2	String	CAMK/PKD	2.7	1.76
P11171	542	S	ASKRASRSLDGAAAV	P11171	EPB41	Q9BZL6	PKD2	String	CAMK/PKD	2.3	1.76
P12931	17	S	DASQRRRSLEPAENV	P12931	SRC	Q9BZL6	PKD2	String	CAMK/PKD	4.6	1.76
P15924	165	S	VPRVRRASSKGGGGY	P15924	DSP	Q9BZL6	PKD2	String	CAMK/PKD	4	1.76
P15924	2209	S	SVQKRSMSFQGIRQP	P15924	DSP	Q9BZL6	PKD2	String	CAMK/PKD	2.1	1.76
P16284	653	S	NSNNEKMSDPNMEAN	P16284	PECAM1	Q9BZL6	PKD2	String	CAMK/PKD	2.2	1.76
P17252	497	T	MDGVTTRTFCGTPDY	P17252	PKCa	Q9BZL6	PKD2	String	CAMK/PKD	2.1	1.76
P17302	372	S	SRASSRASSRPRPDD	P17302	GJA1	Q9BZL6	PKD2	String	CAMK/PKD	2.9	1.76
P17302	373	S	RASSRASSRPRPDDL	P17302	GJA1	Q9BZL6	PKD2	String	CAMK/PKD	1.9	1.76
P17302	364	S	AIVDQRPSSRASSRA	P17302	GJA1	Q9BZL6	PKD2	String	CAMK/PKD	2.5	1.76
P17302	368	S	QRPSSRASSRASSRP	P17302	GJA1	Q9BZL6	PKD2	String	CAMK/PKD	4.5	1.76
P18206	275	S	RALASIDSKLNQAKG	P18206	VCL	Q9BZL6	PKD2	String	CAMK/PKD	2.8	1.76
P18206	809	S	KAVAGNISDPGLQKS	P18206	VCL	Q9BZL6	PKD2	String	CAMK/PKD	2.8	1.76
P18206	346	S	RARGQGSSPVAMQKA	P18206	VCL	Q9BZL6	PKD2	String	CAMK/PKD	2.8	1.76
P18206	600	S	QEVSDVFSDTTTPIK	P18206	VCL	Q9BZL6	PKD2	String	CAMK/PKD	2	1.76
P18206	795	S	DELSKTISPMVMDAK	P18206	VCL	Q9BZL6	PKD2	String	CAMK/PKD	4.5	1.76
P19634	599	S	GGMGKIPSAVSTVSM	P19634	SLC9A1	Q9BZL6	PKD2	String	CAMK/PKD	3.1	1.76
P29474	633	S	WRRKRKESSNTDSAG	P29474	NOS3	Q9BZL6	PKD2	String	CAMK/PKD	2.4	1.76
P29474	634	S	RRKRKESSNTDSAGA	P29474	NOS3	Q9BZL6	PKD2	String	CAMK/PKD	4	1.76
P29474	114	S	RKLQGRPSPGPPAPE	P29474	NOS3	Q9BZL6	PKD2	String	CAMK/PKD	2.2	1.76
P30086	52	S	QVKNRPTSISWDGLD	P30086	PEBP1	Q9BZL6	PKD2	String	CAMK/PKD	2.3	1.76
P35222	552	S	QDTQRRTSMGGTQQQ	B5BU28	CTNNB1	Q9BZL6	PKD2	String	CAMK/PKD	5.4	1.76
P35568	329	S	GSFRVRASSDGEGTM	P35568	IRS1	Q9BZL6	PKD2	String	CAMK/PKD	2.4	1.76
P35568	862	S	LARPTRLSLGDPKAS	P35568	IRS1	Q9BZL6	PKD2	String	CAMK/PKD	3.8	1.76
P35568	527	S	RFRKRTHSAGTSPTI	P35568	IRS1	Q9BZL6	PKD2	String	CAMK/PKD	3.9	1.76
P35579	1114	S	RELESQISELQEDLE	P35579	MYH9	Q9BZL6	PKD2	String	CAMK/PKD	6.4	1.76
P42345	1261	S	PMKKLHVSTINLQKA	P42345	FRAP	Q9BZL6	PKD2	String	CAMK/PKD	2.3	1.76
P42345	2448	S	RSRTRTDSYSAGQSV	P42345	FRAP	Q9BZL6	PKD2	String	CAMK/PKD	1.8	1.76
P47712	727	S	RQNPSRCSVSLSNVE	P47712	PLA2G4A	Q9BZL6	PKD2	String	CAMK/PKD	4.6	1.76
P49815	1411	S	KADVGRLSPEVKARS	P49815	TSC2	Q9BZL6	PKD2	String	CAMK/PKD	2.6	1.76
P49815	1254	S	TALYKSLSVPAASTA	P49815	TSC2	Q9BZL6	PKD2	String	CAMK/PKD	4.9	1.76
P49815	1387	S	QPLSKSSSSPELQTL	P49815	TSC2	Q9BZL6	PKD2	String	CAMK/PKD	3.8	1.76
P49815	1371	S	SSEGGRPSVDLSFQP	P49815	TSC2	Q9BZL6	PKD2	String	CAMK/PKD	2	1.76
P49840	21	S	SGRARTSSFAEPGGG	D3DN89	GSK3B	Q9BZL6	PKD2	Exp.&String	CAMK/PKD	1.8	1.76
Q02952	248	S	ETLKREQSHAEISPP	Q02952	AKAP12	Q9BZL6	PKD2	String	CAMK/PKD	3	1.76
Q02952	371	S	SAHEPRLSAEYEKVE	Q02952	AKAP12	Q9BZL6	PKD2	String	CAMK/PKD	5.2	1.76
Q02952	696	S	KKRARRGSSSDEEGG	Q02952	AKAP12	Q9BZL6	PKD2	String	CAMK/PKD	6	1.76
Q02952	627	S	KKRVRRPSESDKEDE	Q02952	AKAP12	Q9BZL6	PKD2	String	CAMK/PKD	3.8	1.76
Q02952	644	S	KVKSATLSSTESTAS	Q02952	AKAP12	Q9BZL6	PKD2	String	CAMK/PKD	4.5	1.76
Q03135	37	S	KAMADELSEKQVYDA	Q03135	CAV1	Q9BZL6	PKD2	String	CAMK/PKD	4.6	1.76
Q05655	304	S	RASRRSDSASSEPVG	Q05655	PKCd	Q9BZL6	PKD2	String	CAMK/PKD	2.3	1.76
Q05682	783	S	RNLWEKQSVDKVTSP	Q05682	CALD1	Q9BZL6	PKD2	String	CAMK/PKD	3	1.76
Q05682	202	S	EEKPKRGSIGENQVE	Q05682	CALD1	Q9BZL6	PKD2	String	CAMK/PKD	4	1.76
Q06187	55	S	RRGSKKGSIDVEKIT	Q06187	BTK	Q9BZL6	PKD2	String	CAMK/PKD	2	1.76
Q07157	927	S	QQKAEASSPVPYLSP	Q07157	TJP1	Q9BZL6	PKD2	String	CAMK/PKD	1.8	1.76
Q07157	617	S	SKRNLRKSREDLSAQ	Q07157	TJP1	Q9BZL6	PKD2	String	CAMK/PKD	4.7	1.76
Q07157	622	S	RKSREDLSAQPVQTK	Q07157	TJP1	Q9BZL6	PKD2	String	CAMK/PKD	2	1.76
Q13393	505	S	GSVKRVTSGPSLGSL	Q13393	PLD1	Q9BZL6	PKD2	String	CAMK/PKD	3.5	1.76
Q14155	249	S	KASEKPVSPKSGTLK	Q14155	ARHGEF7	Q9BZL6	PKD2	String	CAMK/PKD	2.4	1.76
Q14155	518	S	LSASPRMSGFIYQGK	Q14155	ARHGEF7	Q9BZL6	PKD2	String	CAMK/PKD	3.2	1.76
Q15052	488	S	LSASPRMSGFIYQGK	Q14155	ARHGEF7	Q9BZL6	PKD2	String	CAMK/PKD	3.2	1.76
Q14573	1834	S	KGRVASFSIPGSSSR	Q14573	ITPR3	Q9BZL6	PKD2	String	CAMK/PKD	1.8	1.76
Q14573	1843	S	PGSSSRYSLGPSLRR	Q14573	ITPR3	Q9BZL6	PKD2	String	CAMK/PKD	3.9	1.76
Q14643	1598	S	RNAARRDSVLAASRD	Q14643	ITPR1	Q9BZL6	PKD2	String	CAMK/PKD	7	1.76
Q14643	1764	S	RPSGRRESLTSFGNG	Q14643	ITPR1	Q9BZL6	PKD2	String	CAMK/PKD	4	1.76
Q15746	1772	S	SGLSGRKSSTGSPTS	Q15746	smMLCK	Q9BZL6	PKD2	String	CAMK/PKD	7.3	1.76
Q15746	1773	S	GLSGRKSSTGSPTSP	Q15746	smMLCK	Q9BZL6	PKD2	String	CAMK/PKD	3.5	1.76
Q15746	1570	S	IKYMRQISEGVEYIH	Q15746	smMLCK	Q9BZL6	PKD2	String	CAMK/PKD	2.4	1.76
Q15746	1209	S	KSRRPKSSLPPVLGT	Q15746	smMLCK	Q9BZL6	PKD2	String	CAMK/PKD	3.2	1.76
Q16512	380	S	GSLSGRSSLKAEAEN	Q16512	PKN1	Q9BZL6	PKD2	String	CAMK/PKD	5.6	1.76
Q8WUI4	486	S	RPLSRAQSSPAAPAS	Q8WUI4	HDAC7	Q9BZL6	PKD2	Exp.&String	CAMK/PKD	5.5	1.76
Q8WUI4	181	S	NPLLRKESAPPSLRR	Q8WUI4	HDAC7	Q9BZL6	PKD2	Exp.&String	CAMK/PKD	3	1.76
Q8WUI4	185	S	RKESAPPSLRRRPAE	Q8WUI4	HDAC7	Q9BZL6	PKD2	Exp.&String	CAMK/PKD	2.1	1.76
Q8WUI4	155	S	FPLRKTVSEPNLKLR	Q8WUI4	HDAC7	Q9BZL6	PKD2	Exp.&String	CAMK/PKD	2.2	1.76
Q969G5	62	S	GSVRRIQSGLGALSR	Q969G5	PRKCDBP	Q9BZL6	PKD2	String	CAMK/PKD	2.4	1.76
Q96IZ0	108	S	AAPGPRRSEDEPPAA	Q96IZ0	PAWR	Q9BZL6	PKD2	String	CAMK/PKD	1.9	1.76
Q9NR12	78	S	RACGERLSLGLSRAQ	Q9NR12	PDLIM7	Q9BZL6	PKD2	Exp.&String	CAMK/PKD	9.8	1.76
Q9NR12	260	S	TPLQSRTSIVQAAAG	Q9NR12	PDLIM7	Q9BZL6	PKD2	Exp.&String	CAMK/PKD	6.3	1.76
Q9UDY2	978	S	AQMRRAASSDQLRDN	Q9UDY2	TJP2	Q9BZL6	PKD2	String	CAMK/PKD	2.4	1.76
Q9UDY2	192	S	RSRERDLSRDRSRGR	Q9UDY2	TJP2	Q9BZL6	PKD2	String	CAMK/PKD	5.4	1.76
Q9UDY2	196	S	RDLSRDRSRGRSLER	Q9UDY2	TJP2	Q9BZL6	PKD2	String	CAMK/PKD	4.1	1.76
Q9UDY2	244	S	RDRSRGRSIDQDYER	Q9UDY2	TJP2	Q9BZL6	PKD2	String	CAMK/PKD	2.2	1.76
O14939	76	T	VVGTERYTSGSKVGT	O14939	PLD2	Q9BZL6	PKD2	String	CAMK/PKD	2.2	1.76
P05129	514	T	FPGTTTRTFCGTPDY	P05129	PKCg	Q9BZL6	PKD2	String	CAMK/PKD	2.1	1.76
O14745	290	S	PALVRSASSDTSEEL	O14745	SLC9A3R1	O94806	PKD3	String	CAMK/PKD	3.7	1.76
P00533	1166	S	QKGSHQISLDNPDYQ	P00533	EGFR	O94806	PKD3	String	CAMK/PKD	2.8	1.76
P05783	177	S	TELAMRQSVENDIHG	C9JEA8	N/A	O94806	PKD3	String	CAMK/PKD	5.1	1.76
P08670	73	S	SAVRLRSSVPGVRLL	P08670	VIM	O94806	PKD3	String	CAMK/PKD	4.5	1.76
P08670	202	T	QREEAENTLQSFRQD	P08670	VIM	O94806	PKD3	String	CAMK/PKD	2	1.76
P08670	327	T	RRQVQSLTCEVDALK	P08670	VIM	O94806	PKD3	String	CAMK/PKD	3	1.76
P11171	709	S	SEWDKRLSTHSPFRT	P11171	EPB41	O94806	PKD3	String	CAMK/PKD	2.7	1.76
P11171	542	S	ASKRASRSLDGAAAV	P11171	EPB41	O94806	PKD3	String	CAMK/PKD	2.3	1.76
P12931	17	S	DASQRRRSLEPAENV	P12931	SRC	O94806	PKD3	String	CAMK/PKD	4.6	1.76
P15924	165	S	VPRVRRASSKGGGGY	P15924	DSP	O94806	PKD3	String	CAMK/PKD	4	1.76
P15924	2209	S	SVQKRSMSFQGIRQP	P15924	DSP	O94806	PKD3	String	CAMK/PKD	2.1	1.76
P16284	653	S	NSNNEKMSDPNMEAN	P16284	PECAM1	O94806	PKD3	String	CAMK/PKD	2.2	1.76
P17252	497	T	MDGVTTRTFCGTPDY	P17252	PKCa	O94806	PKD3	String	CAMK/PKD	2.1	1.76
P17302	372	S	SRASSRASSRPRPDD	P17302	GJA1	O94806	PKD3	String	CAMK/PKD	2.9	1.76
P17302	373	S	RASSRASSRPRPDDL	P17302	GJA1	O94806	PKD3	String	CAMK/PKD	1.9	1.76
P17302	364	S	AIVDQRPSSRASSRA	P17302	GJA1	O94806	PKD3	String	CAMK/PKD	2.5	1.76
P17302	368	S	QRPSSRASSRASSRP	P17302	GJA1	O94806	PKD3	String	CAMK/PKD	4.5	1.76
P18206	275	S	RALASIDSKLNQAKG	P18206	VCL	O94806	PKD3	String	CAMK/PKD	2.8	1.76
P18206	809	S	KAVAGNISDPGLQKS	P18206	VCL	O94806	PKD3	String	CAMK/PKD	2.8	1.76
P18206	346	S	RARGQGSSPVAMQKA	P18206	VCL	O94806	PKD3	String	CAMK/PKD	2.8	1.76
P18206	600	S	QEVSDVFSDTTTPIK	P18206	VCL	O94806	PKD3	String	CAMK/PKD	2	1.76
P18206	795	S	DELSKTISPMVMDAK	P18206	VCL	O94806	PKD3	String	CAMK/PKD	4.5	1.76
P19634	599	S	GGMGKIPSAVSTVSM	P19634	SLC9A1	O94806	PKD3	String	CAMK/PKD	3.1	1.76
P29474	633	S	WRRKRKESSNTDSAG	P29474	NOS3	O94806	PKD3	String	CAMK/PKD	2.4	1.76
P29474	634	S	RRKRKESSNTDSAGA	P29474	NOS3	O94806	PKD3	String	CAMK/PKD	4	1.76
P29474	114	S	RKLQGRPSPGPPAPE	P29474	NOS3	O94806	PKD3	String	CAMK/PKD	2.2	1.76
P30086	52	S	QVKNRPTSISWDGLD	P30086	PEBP1	O94806	PKD3	String	CAMK/PKD	2.3	1.76
P35222	552	S	QDTQRRTSMGGTQQQ	B5BU28	CTNNB1	O94806	PKD3	String	CAMK/PKD	5.4	1.76
P35568	329	S	GSFRVRASSDGEGTM	P35568	IRS1	O94806	PKD3	String	CAMK/PKD	2.4	1.76
P35568	862	S	LARPTRLSLGDPKAS	P35568	IRS1	O94806	PKD3	String	CAMK/PKD	3.8	1.76
P35568	527	S	RFRKRTHSAGTSPTI	P35568	IRS1	O94806	PKD3	String	CAMK/PKD	3.9	1.76
P35579	1114	S	RELESQISELQEDLE	P35579	MYH9	O94806	PKD3	String	CAMK/PKD	6.4	1.76
P42345	1261	S	PMKKLHVSTINLQKA	P42345	FRAP	O94806	PKD3	String	CAMK/PKD	2.3	1.76
P42345	2448	S	RSRTRTDSYSAGQSV	P42345	FRAP	O94806	PKD3	String	CAMK/PKD	1.8	1.76
P47712	727	S	RQNPSRCSVSLSNVE	P47712	PLA2G4A	O94806	PKD3	String	CAMK/PKD	4.6	1.76
P49815	1411	S	KADVGRLSPEVKARS	P49815	TSC2	O94806	PKD3	String	CAMK/PKD	2.6	1.76
P49815	1254	S	TALYKSLSVPAASTA	P49815	TSC2	O94806	PKD3	String	CAMK/PKD	4.9	1.76
P49815	1387	S	QPLSKSSSSPELQTL	P49815	TSC2	O94806	PKD3	String	CAMK/PKD	3.8	1.76
P49815	1371	S	SSEGGRPSVDLSFQP	P49815	TSC2	O94806	PKD3	String	CAMK/PKD	2	1.76
P49840	21	S	SGRARTSSFAEPGGG	D3DN89	GSK3B	O94806	PKD3	Exp.&String	CAMK/PKD	1.8	1.76
Q02952	248	S	ETLKREQSHAEISPP	Q02952	AKAP12	O94806	PKD3	String	CAMK/PKD	3	1.76
Q02952	371	S	SAHEPRLSAEYEKVE	Q02952	AKAP12	O94806	PKD3	String	CAMK/PKD	5.2	1.76
Q02952	696	S	KKRARRGSSSDEEGG	Q02952	AKAP12	O94806	PKD3	String	CAMK/PKD	6	1.76
Q02952	627	S	KKRVRRPSESDKEDE	Q02952	AKAP12	O94806	PKD3	String	CAMK/PKD	3.8	1.76
Q02952	644	S	KVKSATLSSTESTAS	Q02952	AKAP12	O94806	PKD3	String	CAMK/PKD	4.5	1.76
Q05655	304	S	RASRRSDSASSEPVG	Q05655	PKCd	O94806	PKD3	String	CAMK/PKD	2.3	1.76
Q05682	783	S	RNLWEKQSVDKVTSP	Q05682	CALD1	O94806	PKD3	String	CAMK/PKD	3	1.76
Q05682	202	S	EEKPKRGSIGENQVE	Q05682	CALD1	O94806	PKD3	String	CAMK/PKD	4	1.76
Q06187	55	S	RRGSKKGSIDVEKIT	Q06187	BTK	O94806	PKD3	String	CAMK/PKD	2	1.76
Q07157	927	S	QQKAEASSPVPYLSP	Q07157	TJP1	O94806	PKD3	String	CAMK/PKD	1.8	1.76
Q07157	617	S	SKRNLRKSREDLSAQ	Q07157	TJP1	O94806	PKD3	String	CAMK/PKD	4.7	1.76
Q07157	622	S	RKSREDLSAQPVQTK	Q07157	TJP1	O94806	PKD3	String	CAMK/PKD	2	1.76
Q13393	505	S	GSVKRVTSGPSLGSL	Q13393	PLD1	O94806	PKD3	String	CAMK/PKD	3.5	1.76
Q14155	249	S	KASEKPVSPKSGTLK	Q14155	ARHGEF7	O94806	PKD3	String	CAMK/PKD	2.4	1.76
Q14155	518	S	LSASPRMSGFIYQGK	Q14155	ARHGEF7	O94806	PKD3	String	CAMK/PKD	3.2	1.76
Q15052	488	S	LSASPRMSGFIYQGK	Q14155	ARHGEF7	O94806	PKD3	String	CAMK/PKD	3.2	1.76
Q14573	1834	S	KGRVASFSIPGSSSR	Q14573	ITPR3	O94806	PKD3	String	CAMK/PKD	1.8	1.76
Q14573	1843	S	PGSSSRYSLGPSLRR	Q14573	ITPR3	O94806	PKD3	String	CAMK/PKD	3.9	1.76
Q14643	1598	S	RNAARRDSVLAASRD	Q14643	ITPR1	O94806	PKD3	String	CAMK/PKD	7	1.76
Q14643	1764	S	RPSGRRESLTSFGNG	Q14643	ITPR1	O94806	PKD3	String	CAMK/PKD	4	1.76
Q15746	1772	S	SGLSGRKSSTGSPTS	Q15746	smMLCK	O94806	PKD3	String	CAMK/PKD	7.3	1.76
Q15746	1773	S	GLSGRKSSTGSPTSP	Q15746	smMLCK	O94806	PKD3	String	CAMK/PKD	3.5	1.76
Q15746	1570	S	IKYMRQISEGVEYIH	Q15746	smMLCK	O94806	PKD3	String	CAMK/PKD	2.4	1.76
Q15746	1209	S	KSRRPKSSLPPVLGT	Q15746	smMLCK	O94806	PKD3	String	CAMK/PKD	3.2	1.76
Q16512	380	S	GSLSGRSSLKAEAEN	Q16512	PKN1	O94806	PKD3	String	CAMK/PKD	5.6	1.76
Q969G5	62	S	GSVRRIQSGLGALSR	Q969G5	PRKCDBP	O94806	PKD3	String	CAMK/PKD	2.4	1.76
Q96IZ0	108	S	AAPGPRRSEDEPPAA	Q96IZ0	PAWR	O94806	PKD3	String	CAMK/PKD	1.9	1.76
Q9UDY2	978	S	AQMRRAASSDQLRDN	Q9UDY2	TJP2	O94806	PKD3	String	CAMK/PKD	2.4	1.76
Q9UDY2	192	S	RSRERDLSRDRSRGR	Q9UDY2	TJP2	O94806	PKD3	String	CAMK/PKD	5.4	1.76
Q9UDY2	196	S	RDLSRDRSRGRSLER	Q9UDY2	TJP2	O94806	PKD3	String	CAMK/PKD	4.1	1.76
Q9UDY2	244	S	RDRSRGRSIDQDYER	Q9UDY2	TJP2	O94806	PKD3	String	CAMK/PKD	2.2	1.76
O14939	76	T	VVGTERYTSGSKVGT	O14939	PLD2	O94806	PKD3	String	CAMK/PKD	2.2	1.76
P05129	514	T	FPGTTTRTFCGTPDY	P05129	PKCg	O94806	PKD3	String	CAMK/PKD	2.1	1.76
